# Supplementary material for: The relative binding position of Nck and Grb2 adaptors impacts actin-based motility of Vaccinia virus
Source: eLife journal article supplement (doi:10.7554/elife.74655), 2022-07-07
Supplement: supp [file Basant and Way_resub_stats summary table.docx]

| *Figure* | *Measurement* | *Conditions* | *Test* | *p value* | *95% CI lo* | *95% CI hi* |
| --- | --- | --- | --- | --- | --- | --- |
| Fig2B | % virus w/ tails | A36 N-G vs A36 G-N | Welch’s t | 0.80926575 | -8.58 | 10.05 |
| Fig2B | Tail length | A36 N-G vs A36 G-N | Welch’s t | 1.70E-03 | -2.32 | -1.07 |
| Fig2C | Virus speed | A36 N-G vs A36 G-N | Welch’s t | 0.01622998 | -0.12 | -0.02 |
| Fig2D | Plaque size | A36 N-G vs A36 G-N | Welch’s t | 0.00570193 | -0.45 | -0.15 |
| Fig2-supp1A | % virus w/ tails | A36 N-G vs A36 N-X | Dunnett’s* | 0.6993 | -3.643 | 7.018 |
| Fig2-supp1A | % virus w/ tails | A36 N-G vs A36 X-G | Dunnett’s* | <0.0001 | 11.72 | 22.38 |
| Fig2-supp1A | % virus w/ tails | A36 N-G vs A36 X-X | Dunnett’s* | <0.0001 | 14.62 | 25.28 |
| Fig2-supp1A | Tail length | A36 N-G vs A36 N-X | Dunnett’s* | 0.0022 | 0.6130 | 2.154 |
| Fig2-supp1A | Tail length | A36 N-G vs A36 X-G | Dunnett’s* | <0.0001 | 1.473 | 3.014 |
| Fig2-supp1A | Tail length | A36 N-G vs A36 X-X | Dunnett’s* | <0.0001 | 3.236 | 4.777 |
| Fig2-supp1B | % virus w/ tails | A36 N-X vs A36 X-N | Welch’s t | 0.180999 | -1.78 | 6.13 |
| Fig2-supp1B | Tail length | A36 N-X vs A36 X-N | Welch’s t | 0.18949283 | -1.35 | 0.39 |
| Fig2-supp1C | Plaque size | A36 G-N clone 1 vs 2 | Welch’s t | 0.57525568 | -0.26 | 0.41 |
| Fig2-supp2A | % virus w/ tails | A36 N-G vs A36 N-N | Tukey’s* | 0.0603 | -13.69 | 0.3448 |
| Fig2-supp2A | % virus w/ tails | A36 N-N vs A36 G-G | Tukey’s* | <0.0001 | 19.31 | 33.34 |
| Fig2-supp2A | Tail length | A36 N-G vs A36 N-N | Tukey’s* | 0.3164 | -0.5598 | 1.686 |
| Fig2-supp2A | Tail length | A36 N-N vs A36 G-G | Tukey’s* | 0.0058 | 0.9076 | 3.419 |
| Fig2-supp2B | % virus w/ tails | A36 N-G 3x vs A36 G-N 3x | Welch’s t | 0.43878577 | -18.18 | 10.96 |
| Fig2-supp2B | Tail length | A36 N-G 3x vs A36 G-N 3x | Welch’s t | 0.03873604 | -2.17 | -0.12 |
| Fig3C | % virus w/ tails | N-WASP +/+ vs -/- | Welch’s t | 0.01762321 | -35.1 | -9.36 |
| Fig3D | % virus w/ tails | p14 N-G vs Y96F | Dunnett’s* | 0.0009 | 11.02 | 31.81 |
| Fig3D | % virus w/ tails | p14 N-G vs Y100F | Dunnett’s* | 0.3844 | -5.144 | 15.65 |
| Fig3D | % virus w/ tails | p14 N-G vs Y116F | Dunnett’s* | 0.0075 | 4.833 | 25.62 |
| Fig3D | Tail length | p14 N-G vs Y96F | Dunnett’s* | 0.0010 | 0.7896 | 2.304 |
| Fig3D | Tail length | p14 N-G vs Y100F | Dunnett’s* | 0.6587 | -1.014 | 0.5004 |
| Fig3D | Tail length | p14 N-G vs Y116F | Dunnett’s* | 0.0077 | 0.3462 | 1.860 |
| Fig3E | % virus w/ tails | p14 N-G vs Y96,116F | Welch’s t | 2.04E-04 | -23.56 | -20.84 |
| Fig4C | % virus w/ tails | p14 N-G vs p14 G-N | Welch’s t | 0.48204762 | -8.46 | 4.5 |
| Fig4C | Tail length | p14 N-G vs p14 G-N | Welch’s t | 0.01480858 | -1.17 | -0.21 |
| Fig4D | Virus speed | p14 N-G vs p14 G-N | Welch’s t | 0.03578749 | -0.09 | -0.01 |
| Fig4E | Plaque size | p14 N-G vs p14 G-N | Welch’s t | 0.00512664 | -0.7 | -0.26 |
| Fig5A | Nck intensity | A36 N-G vs A36 G-N | Welch’s t | 0.73826746 | -0.06 | 0.07 |
| Fig5A | Grb2 intensity | A36 N-G vs A36 G-N | Welch’s t | 0.0103029 | -0.14 | -0.04 |
| Fig5A | N-WASP intensity | A36 N-G vs A36 G-N | Welch’s t | 0.01907974 | -0.4 | -0.07 |
| Fig5B | Nck intensity | A36 N-G vs A36 G-N | Welch’s t | 0.86798292 | -3977.11 | 3500.43 |
| Fig5B | N-WASP intensity | A36 N-G vs A36 G-N | Welch’s t | 0.00597793 | -0.19 | -0.06 |
| Fig5C | Nck intensity | A36 N-G vs A36 G-N | Dunnett’s* | 0.8707 | -0.1244 | 0.09102 |
| Fig5C | Nck intensity | A36 N-G vs A36 N-X | Dunnett’s* | 0.9140 | -0.09436 | 0.1210 |
| Fig5C | N-WASP intensity | A36 N-G vs A36 G-N | Dunnett’s* | 0.0161 | 0.03749 | 0.2692 |
| Fig5C | N-WASP intensity | A36 N-G vs A36 N-X | Dunnett’s* | 0.1787 | -0.03917 | 0.1925 |
| Fig5-supp1A | RFP intensity | A36 N-G vs A36 G-N | Welch’s t | 0.82768272 | -489.48 | 429.98 |
| Fig5-supp1A | RFP intensity | GFP-Nck vs -Grb2 | Dunnett’s* | 0.5265 | -462.7 | 219.5 |
| Fig5-supp1A | RFP intensity | GFP-Nck vs -N-WASP | Dunnett’s* | 0.5998 | -234.4 | 447.9 |
| Fig5-supp1B | tgGFP2 intensity | A36 N-G vs A36 G-N | Welch’s t | 0.26334481 | -0.3 | 0.11 |
| Fig5-supp1C | WIP intensity | A36 N-G vs A36 G-N | Welch’s t | 0.11405022 | -0.45 | 0.09 |
| Fig6A | Src intensity | A36 N-G vs A36 G-N | Welch’s t | 0.67752574 | -0.22 | 0.17 |
| Fig6B | pY418 intensity | A36 N-G vs A36 G-N | Welch’s t | 0.61605355 | 23969.89 | -16142.32 |
| Fig6C | Nck(SH2)intensity | A36 N-G vs A36 G-N | Welch’s t | 0.80287918 | -0.36 | 0.43 |
| Fig6D | pY132 intensity | A36 N-G vs A36 G-N | Tukey’s* | 0.0025 | -74854 | -23645 |
| Fig6D | pY132 intensity | A36 N-G vs A36 N-X | Tukey’s* | 0.0496 | 48.91 | 51258 |
| Fig6-supp1C | pY132 intensity | AllStars vs Grb2 siRNA | Welch’s t | 0.19693593 | -27463.85 | 81286.68 |
| Fig7B | Tail length | A36 N-G vs A36 G-N | Tukey’s* | 0.0003 | 1.063 | 2.650 |
| Fig7B | Tail length | A36 N-G vs A36 G-N-G | Tukey’s* | 0.0067 | 0.3698 | 1.957 |
| Fig7B | Tail length | A36 N-G vs A36 G-G-N | Tukey’s* | 0.0001 | 1.316 | 2.904 |
| Fig7B | Tail length | A36 G-N vs A36 G-G-N | Tukey’s* | 0.7419 | -0.5402 | 1.047 |
| Fig7B | Tail length | A36 G-N-G vs A36 G-G-N | Tukey’s* | 0.0212 | 0.1532 | 1.740 |
| Fig7C | Virus speed | A36 N-G vs A36 G-N | Tukey’s* | 0.0015 | 0.04492 | 0.1484 |
| Fig7C | Virus speed | A36 N-G vs A36 G-N-G | Tukey’s* | 0.0082 | 0.02159 | 0.1251 |
| Fig7C | Virus speed | A36 N-G vs A36 G-G-N | Tukey’s* | 0.0006 | 0.05825 | 0.1617 |
| Fig7C | Virus speed | A36 G-N vs A36 G-G-N | Tukey’s* | 0.8412 | -0.03841 | 0.06508 |
| Fig7C | Virus speed | A36 G-N-G vs A36 G-G-N | Tukey’s* | 0.1847 | -0.01508 | 0.08841 |
| Fig7D | Plaque size | A36 N-G vs A36 G-N | Tukey’s* | 0.0027 | 0.1284 | 0.4916 |
| Fig7D | Plaque size | A36 N-G vs A36 G-N-G | Tukey’s* | 0.0788 | -0.01829 | 0.3450 |
| Fig7D | Plaque size | A36 N-G vs A36 G-G-N | Tukey’s* | 0.0035 | 0.1150 | 0.4783 |
| Fig7D | Plaque size | A36 G-N vs A36 G-G-N | Tukey’s* | 0.9951 | -0.1950 | 0.1683 |
| Fig7D | Plaque size | A36 G-N-G vs A36 G-G-N | Tukey’s* | 0.1652 | -0.04829 | 0.3150 |
| Fig7E | N-WASP intensity | A36 N-G vs A36 G-N | Tukey’s* | 0.0384 | 0.008537 | 0.2981 |
| Fig7E | N-WASP intensity | A36 N-G vs A36 G-N-G | Tukey’s* | 0.8795 | -0.1781 | 0.1115 |
| Fig7E | N-WASP intensity | A36 N-G vs A36 G-G-N | Tukey’s* | 0.0384 | 0.008537 | 0.2981 |
| Fig7E | N-WASP intensity | A36 G-N vs A36 G-G-N | Tukey’s* | >0.9999 | -0.1448 | 0.1448 |
| Fig7E | N-WASP intensity | A36 G-N-G vs A36 G-G-N | Tukey’s* | 0.0140 | 0.04187 | 0.3315 |
| Fig7-supp1A | % virus w/ tails | A36 N-G vs A36 G-N | Tukey’s* | 0.6528 | -8.371 | 18.19 |
| Fig7-supp1A | % virus w/ tails | A36 N-G vs A36 G-N-G | Tukey’s* | 0.7972 | -9.479 | 17.08 |
| Fig7-supp1A | % virus w/ tails | A36 N-G vs A36 G-G-N | Tukey’s* | 0.3775 | -6.179 | 20.38 |
| Fig7-supp1A | % virus w/ tails | A36 G-N vs A36 G-G-N | Tukey’s* | 0.9497 | -11.09 | 15.47 |
| Fig7-supp1A | % virus w/ tails | A36 G-N-G vs A36 G-G-N | Tukey’s* | 0.8544 | -9.979 | 16.58 |
| Fig7-supp1B | Nck intensity | A36 N-G vs A36 G-N | Tukey’s* | 0.9731 | -0.1432 | 0.1099 |
| Fig7-supp1B | Nck intensity | A36 N-G vs A36 G-N-G | Tukey’s* | 0.8703 | -0.09653 | 0.1565 |
| Fig7-supp1B | Nck intensity | A36 N-G vs A36 G-G-N | Tukey’s* | 0.7913 | -0.08986 | 0.1632 |
| Fig7-supp1B | Nck intensity | A36 G-N vs A36 G-G-N | Tukey’s* | 0.5602 | -0.07319 | 0.1799 |
| Fig7-supp1B | Nck intensity | A36 G-N-G vs A36 G-G-N | Tukey’s* | 0.9981 | -0.1199 | 0.1332 |
| Fig7-supp1C | Grb2 intensity | A36 N-G vs A36 G-N | Tukey’s* | 0.0024 | 0.1412 | 0.5255 |
| Fig7-supp1C | Grb2 intensity | A36 N-G vs A36 G-N-G | Tukey’s* | 0.1968 | -0.3255 | 0.05881 |
| Fig7-supp1C | Grb2 intensity | A36 N-G vs A36 G-G-N | Tukey’s* | 0.0024 | 0.1412 | 0.5255 |
| Fig7-supp1C | Grb2 intensity | A36 G-N vs A36 G-G-N | Tukey’s* | >0.9999 | -0.1921 | 0.1921 |
| Fig7-supp1C | Grb2 intensity | A36 G-N-G vs A36 G-G-N | Tukey’s* | 0.0002 | 0.2745 | 0.6588 |
| Fig7-supp2A | Plaque size | A36 G-N-G clone 1 vs 2 | Welch’s t | 0.90641681 | -0.67 | 0.61 |
| Fig7-supp2B | Plaque size | A36 G-G-N clone 1 vs 2 | Welch’s t | 0.49468885 | -0.25 | 0.44 |

* multiple comparisons tests
