# Supplementary material for: The relative binding position of Nck and Grb2 adaptors impacts actin-based motility of Vaccinia virus
Source: eLife journal article supplement (doi:10.7554/elife.74655), 2022-07-07
Supplement: supp [file elife-74655-supp-v1.zip]

**A**

A36 N-G virus

...TEHIYDSVAGSTLLINNDRNEQTIYQNTTVI  
Nck motif Grb2 motif

A36 N-N virus

...TEHIYDSVAGSTLLINNDRNTEHIYDSVAGST  
Nck motif Nck motif

A36 G-G virus

...EQTIYQNTTVILLINNDRNEQTIYQNTTVI  
Grb2 motif Grb2 motif

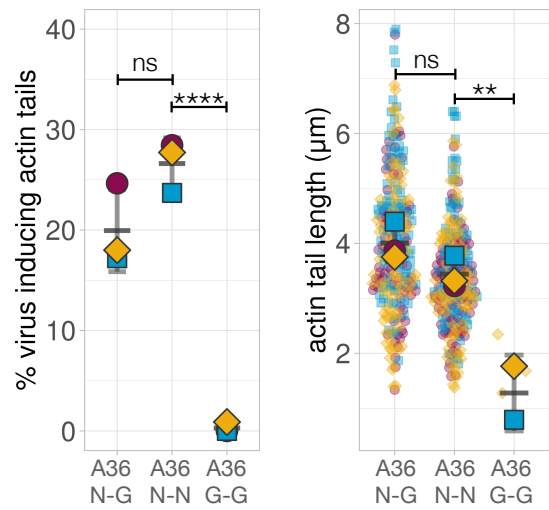

**B**

A36 N-G virus 3x linker

...TEHIYDSVAGSTLLINNDRNLLINNDRNLLINNDRNEQTIYQNTTVI  
Nck motif

A36 G-N virus 3x linker

...EQTIYQNTTVILLINNDRNLLINNDRNLLINNDRNTEHIYDSVAGST  
Grb2 motif

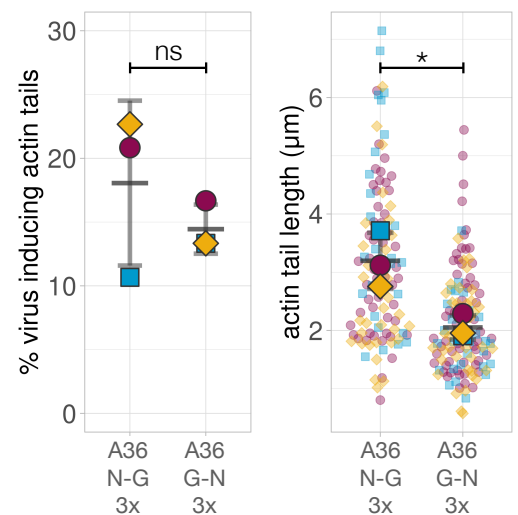

**Figure 2 - suppl 2**
