# Supplementary material for: The relative binding position of Nck and Grb2 adaptors impacts actin-based motility of Vaccinia virus
Source: eLife journal article supplement (doi:10.7554/elife.74655), 2022-07-07
Supplement: supp [file elife-74655-supp-v1.zip]

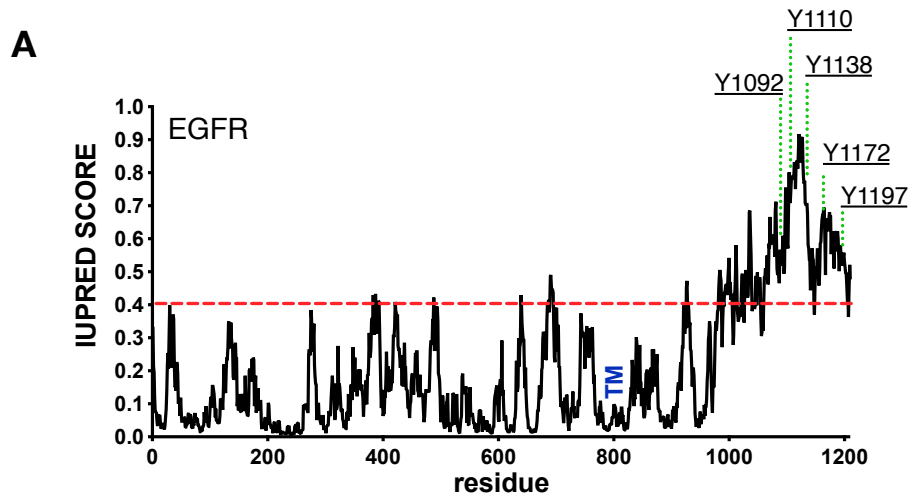

**B**

|                |                              |      |                               |      |                      |      |
|----------------|------------------------------|------|-------------------------------|------|----------------------|------|
| EGFR_human     | SFLQRYSSDPTGALTEDSIDDTFLPVPE | 1092 | YINQSVPKRPAGS--VQN            | 1110 | NPVYHNQPLNPA--PS     | 1120 |
| EGFR_pig       | SFLQRYSSDPTGALTEDSLDDTFLPAPE |      | YVNQSVPKRPAGS--VQN            |      | NPVYHNQPLSAA--PG     | 1078 |
| EGFR_mouse     | AFLQRYSSDPTGAVTEDNIDDAFLPVPE |      | YVNQSVPKRPAGS--VQN            |      | NPVYHNQPLHPA--PG     | 1120 |
| EGFR_frog      | SFVQRYSTDPTV-ILEDSDIDFLPVPE  |      | YVNQSVMLKPL-VETQTN            |      | SVYQNLI              | 1117 |
| EGFR_chicken   | SFVQRYSSDPTGNFLEESIDDGFLPAPE |      | YVNQLMPKKPSTAMVQNI            |      | YNNISLTAISKLP        | 1134 |
| EGFR_zebrafish | SMVLRYIPDPTERFQE----         |      | GDFQPAPGYNEYMNQNE----         |      | SSMINPVYQQPHGPPRTLL- | 1110 |
|                | .....                        |      | .....                         |      | .....                |      |
| EGFR_human     | RDPHYQDPHSTAVGNPEY           | 1138 | LNTVQPTCVNSTF----             |      | DSPAHWAQKGSHQISLD    | 1172 |
| EGFR_pig       | RDPHYQNSHNSAVGNPEY           |      | LNTPRPACINGGL----             |      | DGPAFWAQTGSHQINLD    | 1135 |
| EGFR_mouse     | RDLHYQNPHNSAVGNPEY           |      | LNTAQPTCLSSGF----             |      | NSPALWIQKGSHQMSLD    | 1177 |
| EGFR_frog      | KENLYQNSHNSGLNPEY            |      | LNADQTLVTKTDF----             |      | DYSSIWDQKANLQINLD    | 1174 |
| EGFR_chicken   | MDSRYQNSHSTAVDNPEY           |      | LNTNQSPKLVTF----              |      | ESSPYWIQSGNHQINLD    | 1191 |
| EGFR_zebrafish | -----HSSPALDETEEY            |      | LNCFKSPAPASVVEYLNTSHTQLLSTKPF |      | FSSMDNPDYQQDFC       | 1165 |
|                | .....                        |      | .....                         |      | .....                |      |
| EGFR_human     | PKEAKPNGIFKGSTAENAEY         | 1197 | LRVAPQSSEFIGA--               |      |                      | 1210 |
| EGFR_pig       | PKEAKSNGICKGPAAENAEY         |      | LRAAPASSDLTGA--               |      |                      | 1168 |
| EGFR_mouse     | PKETKPNGIFKGPTAENAEY         |      | LRVAPPSSEFIGA--               |      |                      | 1210 |
| EGFR_frog      | PKEHKTNGHFKIPAAQNPEY         |      | FGLAPVT-DYVEASA               |      |                      | 1208 |
| EGFR_chicken   | PNETKPNGLLKVPAAENPEY         |      | LRVAAPKSEYIEASA               |      |                      | 1226 |
| EGFR_zebrafish | PLELKTHTNGHLPAAQNQEY         |      | MGLEVH-----                   |      |                      | 1191 |
|                | .....                        |      | .....                         |      | .....                |      |

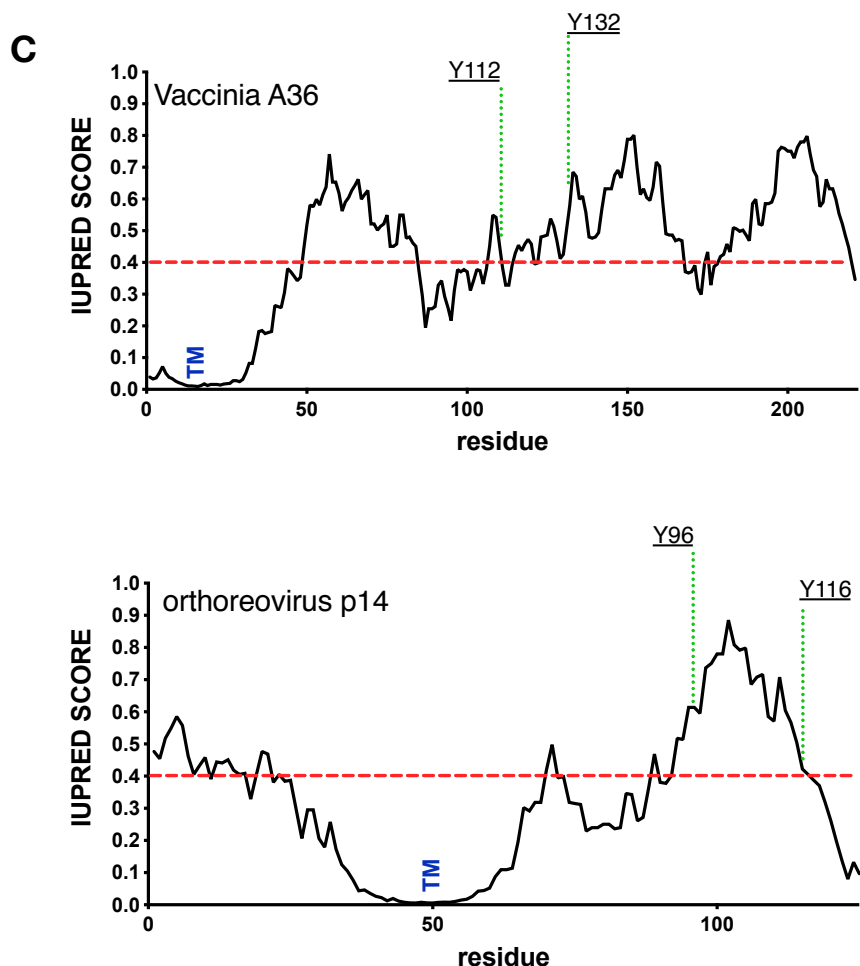

Figure 1 - suppl 1
