# Supplementary material for: The relative binding position of Nck and Grb2 adaptors impacts actin-based motility of Vaccinia virus
Source: eLife journal article supplement (doi:10.7554/elife.74655), 2022-07-07
Supplement: supp [file elife-74655-supp-v1.zip]

**A**

A36 N-G virus

...TEHIYDSVAGSTLLINNDRNEQTIYQNTTVVI  
Nck motif Grb2 motif

A36 X-G virus

...TEHIFDSVAGSTLLINNDRNEQTIYQNTTVVI  
Grb2 motif

A36 N-X virus

...TEHIYDSVAGSTLLINNDRNEQTIYQNTTVVI  
Nck motif

A36 X-X virus

...TEHIFDSVAGSTLLINNDRNEQTIYQNTTVVI

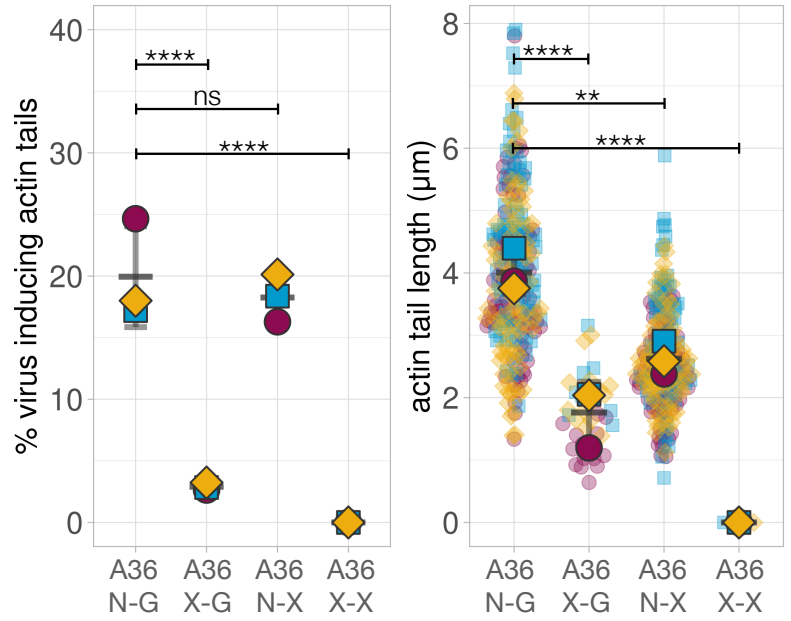

**B**

A36 N-X virus

...TEHIYDSVAGSTLLINNDRNEQTIYQNTTVVI  
Nck motif

A36 X-N virus

...EQTIYQNTTVVILLINNDRNTEHIYDSVAGST  
Nck motif

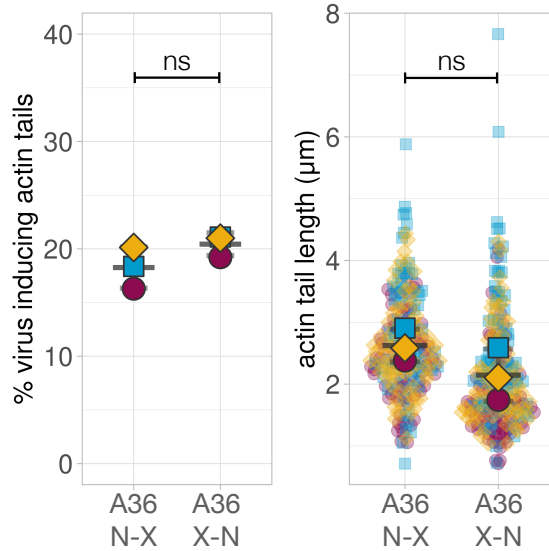

**C**

A36 G-N virus

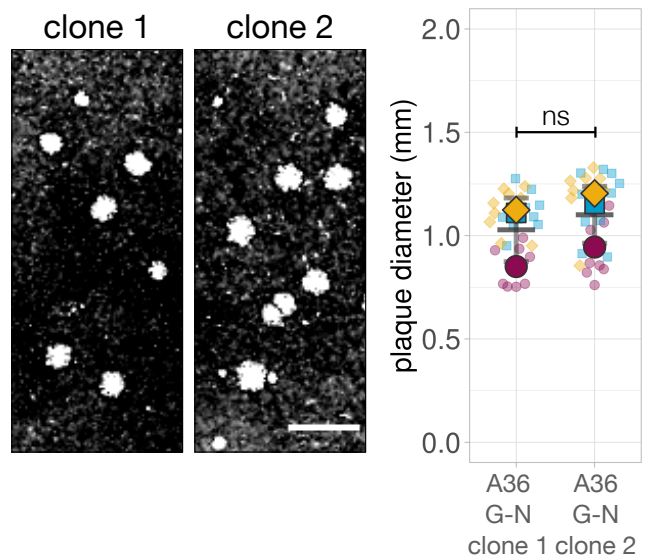

Figure 2 - suppl 1
