# Supplementary material for: The relative binding position of Nck and Grb2 adaptors impacts actin-based motility of Vaccinia virus
Source: eLife journal article supplement (doi:10.7554/elife.74655), 2022-07-07
Supplement: supp [file Fig2-suppl1A_source data.xlsx]

## Sheet: Sheet1
replicate	condition	actin tail length			replicate	condition	actin tail number
1	NG	4.57244			1	NG	24.6528
1	NG	3.47226			2	NG	17.193
1	NG	3.19927			3	NG	18
1	NG	2.36594			1	NX	16.2866
1	NG	1.92053			2	NX	18.3673
1	NG	3.9648			3	NX	20.1299
1	NG	1.75043			1	XG	2.63158
1	NG	2.11242			2	XG	2.83401
1	NG	2.58358			3	XG	3.23887
1	NG	5.52832			1	XX	0
1	NG	5.55673			2	XX	0
1	NG	5.39607			3	XX	0
1	NG	3.85096
1	NG	4.50713
1	NG	7.79944
1	NG	4.54897
1	NG	3.22347
1	NG	4.48045
1	NG	3.56547
1	NG	3.87812
1	NG	1.33461
1	NG	2.65407
1	NG	3.35895
1	NG	3.13719
1	NG	3.62324
1	NG	4.03502
1	NG	3.85475
1	NG	5.56171
1	NG	3.87917
1	NG	3.8634
1	NG	3.52383
1	NG	4.13381
1	NG	3.00218
1	NG	4.59072
1	NG	3.24808
1	NG	3.3761
1	NG	5.2624
1	NG	2.58687
1	NG	3.37125
1	NG	5.99511
1	NG	3.23112
1	NG	4.6905
1	NG	3.45226
1	NG	3.23135
1	NG	3.33891
1	NG	4.45982
1	NG	4.34564
1	NG	2.8418
1	NG	2.20397
1	NG	4.97312
1	NG	3.05818
1	NG	3.59029
1	NG	2.79091
1	NG	4.64069
1	NG	3.20172
1	NG	2.26949
1	NG	2.41562
1	NG	4.116
1	NG	2.33895
1	NG	5.25013
1	NG	3.88307
1	NG	4.34878
1	NG	4.10961
1	NG	4.33288
1	NG	3.5744
1	NG	3.3504
1	NG	6.03606
1	NG	5.8524
1	NG	5.34785
1	NG	3.35632
1	NG	2.34139
1	NG	3.12995
1	NG	4.33874
1	NG	5.70363
1	NG	5.95964
1	NG	3.383
1	NG	4.55865
1	NG	5.74635
1	NG	3.15022
2	NG	3.06377
2	NG	3.25217
2	NG	5.54717
2	NG	6.39367
2	NG	4.04501
2	NG	2.9172
2	NG	4.73586
2	NG	5.50841
2	NG	3.39476
2	NG	5.77381
2	NG	3.23156
2	NG	4.29655
2	NG	4.15252
2	NG	4.87295
2	NG	4.20934
2	NG	3.69699
2	NG	5.41549
2	NG	5.08807
2	NG	3.37263
2	NG	3.24758
2	NG	2.69076
2	NG	7.28841
2	NG	4.41283
2	NG	6.61307
2	NG	4.61917
2	NG	4.77299
2	NG	5.56655
2	NG	4.53135
2	NG	2.91802
2	NG	4.69455
2	NG	5.68334
2	NG	7.84431
2	NG	6.26851
2	NG	5.75872
2	NG	7.52281
2	NG	5.67161
2	NG	5.96731
2	NG	6.48791
2	NG	5.64356
2	NG	4.93456
2	NG	4.25105
2	NG	4.63702
2	NG	7.89959
2	NG	3.72667
2	NG	4.66548
2	NG	3.73218
2	NG	4.25789
2	NG	3.88008
2	NG	4.61764
2	NG	3.89518
2	NG	4.12529
2	NG	2.99003
2	NG	3.13466
2	NG	2.62997
2	NG	2.89476
2	NG	2.38955
2	NG	2.96065
2	NG	4.97597
2	NG	5.41304
2	NG	3.53124
2	NG	1.8675
2	NG	4.68094
2	NG	4.59601
2	NG	3.56748
2	NG	3.52036
2	NG	3.72251
2	NG	4.78139
2	NG	3.74208
2	NG	3.18893
2	NG	4.37595
2	NG	3.80869
2	NG	5.9436
2	NG	4.01348
2	NG	4.67066
2	NG	6.10982
2	NG	2.35889
2	NG	4.45229
2	NG	3.96054
2	NG	4.5206
2	NG	5.94644
2	NG	2.92819
2	NG	5.10216
2	NG	3.6202
2	NG	3.82853
2	NG	4.63826
2	NG	3.46152
2	NG	4.0807
2	NG	4.72561
2	NG	3.15237
2	NG	2.42452
2	NG	4.21276
2	NG	2.90125
2	NG	3.21774
3	NG	5.31491
3	NG	3.85835
3	NG	5.16508
3	NG	5.48383
3	NG	6.43732
3	NG	6.79249
3	NG	5.36846
3	NG	4.79716
3	NG	5.99709
3	NG	4.1056
3	NG	3.76023
3	NG	6.44395
3	NG	2.12711
3	NG	5.457
3	NG	3.35774
3	NG	6.27963
3	NG	6.11225
3	NG	3.07081
3	NG	3.2947
3	NG	4.31939
3	NG	4.60918
3	NG	2.18443
3	NG	3.12222
3	NG	2.11313
3	NG	2.08733
3	NG	2.74074
3	NG	5.01473
3	NG	2.8355
3	NG	4.35367
3	NG	4.24514
3	NG	4.43139
3	NG	4.4829
3	NG	3.10437
3	NG	3.10447
3	NG	3.01084
3	NG	5.18211
3	NG	2.78654
3	NG	2.6879
3	NG	1.75195
3	NG	4.20883
3	NG	4.30828
3	NG	2.59243
3	NG	1.40617
3	NG	1.91311
3	NG	3.27104
3	NG	3.43597
3	NG	6.88316
3	NG	2.68546
3	NG	3.42904
3	NG	2.64812
3	NG	1.39393
3	NG	3.43112
3	NG	3.93321
3	NG	2.66996
3	NG	1.70299
3	NG	2.37501
3	NG	4.02662
3	NG	2.73293
3	NG	2.05049
3	NG	4.47568
3	NG	3.35099
3	NG	2.06721
3	NG	2.48875
3	NG	4.78206
3	NG	3.43052
3	NG	3.24073
3	NG	2.22303
3	NG	3.74562
3	NG	4.76556
3	NG	4.85995
3	NG	3.28899
3	NG	2.4082
3	NG	3.71039
3	NG	5.23292
3	NG	3.62568
3	NG	4.79476
3	NG	5.06243
3	NG	3.24736
3	NG	3.20267
1	NX	3.48187
1	NX	3.73351
1	NX	3.00716
1	NX	1.42678
1	NX	2.72901
1	NX	1.77317
1	NX	2.56051
1	NX	1.97339
1	NX	3.47402
1	NX	1.0557
1	NX	2.38384
1	NX	1.97156
1	NX	3.4477
1	NX	3.20188
1	NX	2.74186
1	NX	1.80387
1	NX	2.13537
1	NX	1.50022
1	NX	2.4176
1	NX	2.66342
1	NX	2.61232
1	NX	1.67831
1	NX	1.8462
1	NX	1.24613
1	NX	2.94086
1	NX	2.34457
1	NX	2.16138
1	NX	3.10202
1	NX	3.53338
1	NX	3.04419
1	NX	3.56276
1	NX	2.44721
1	NX	2.28426
1	NX	2.19788
1	NX	1.41053
1	NX	2.32282
1	NX	2.78556
1	NX	2.16939
1	NX	1.99716
1	NX	3.62693
1	NX	2.56466
1	NX	2.65833
1	NX	2.29929
1	NX	2.32503
1	NX	2.88617
1	NX	1.33687
1	NX	1.96487
1	NX	1.07349
1	NX	2.42503
1	NX	2.62155
1	NX	2.42495
1	NX	3.28613
1	NX	1.82385
1	NX	2.97805
1	NX	2.51688
1	NX	1.78259
1	NX	2.04228
1	NX	3.23739
1	NX	1.88936
1	NX	1.20411
1	NX	1.3671
1	NX	2.89458
1	NX	1.72978
1	NX	2.07461
1	NX	1.29977
1	NX	1.95086
1	NX	3.22686
1	NX	2.34842
1	NX	2.7543
1	NX	2.23422
1	NX	2.612
1	NX	2.75162
1	NX	2.41137
2	NX	2.51736
2	NX	3.36845
2	NX	3.21076
2	NX	3.79777
2	NX	3.48881
2	NX	3.80327
2	NX	3.96025
2	NX	4.44893
2	NX	4.5848
2	NX	5.87999
2	NX	4.36897
2	NX	2.28347
2	NX	3.03736
2	NX	4.76687
2	NX	3.50819
2	NX	4.86907
2	NX	3.44066
2	NX	3.48391
2	NX	2.42842
2	NX	3.87569
2	NX	3.78706
2	NX	1.928
2	NX	1.49899
2	NX	3.41445
2	NX	0.714
2	NX	3.74768
2	NX	3.77757
2	NX	2.36263
2	NX	2.84264
2	NX	2.26685
2	NX	2.53715
2	NX	1.22002
2	NX	2.64781
2	NX	2.15476
2	NX	1.59331
2	NX	2.20779
2	NX	2.39485
2	NX	3.07259
2	NX	3.43875
2	NX	2.0636
2	NX	2.23027
2	NX	2.27579
2	NX	1.27026
2	NX	2.41817
2	NX	1.76328
2	NX	1.05066
2	NX	2.76608
2	NX	2.11224
2	NX	3.27631
2	NX	2.1564
2	NX	2.57039
2	NX	2.90555
2	NX	2.33318
2	NX	1.39071
2	NX	1.91929
2	NX	2.79934
2	NX	2.74763
2	NX	2.88413
2	NX	1.95197
2	NX	2.62263
2	NX	2.95206
2	NX	3.56188
2	NX	3.92374
2	NX	2.5167
2	NX	3.58227
2	NX	3.6204
2	NX	2.94758
2	NX	4.74226
2	NX	3.5456
2	NX	2.01043
2	NX	3.31211
2	NX	2.24767
3	NX	3.21014
3	NX	2.68505
3	NX	2.91751
3	NX	1.75124
3	NX	2.67475
3	NX	3.58326
3	NX	2.58101
3	NX	2.58009
3	NX	2.62925
3	NX	1.95789
3	NX	1.85293
3	NX	2.06213
3	NX	2.85733
3	NX	1.76725
3	NX	2.3511
3	NX	1.5403
3	NX	2.31489
3	NX	2.29551
3	NX	1.59671
3	NX	2.52766
3	NX	2.35324
3	NX	3.32398
3	NX	3.14599
3	NX	3.9831
3	NX	2.80775
3	NX	2.75196
3	NX	2.84376
3	NX	2.08366
3	NX	2.23003
3	NX	1.52806
3	NX	2.28205
3	NX	1.44085
3	NX	1.122
3	NX	1.74961
3	NX	2.59786
3	NX	2.243
3	NX	3.84785
3	NX	2.62952
3	NX	2.45207
3	NX	2.31813
3	NX	2.67729
3	NX	2.77701
3	NX	2.20031
3	NX	4.33686
3	NX	2.17472
3	NX	1.88458
3	NX	2.99795
3	NX	3.67668
3	NX	2.3675
3	NX	1.632
3	NX	2.18656
3	NX	3.98432
3	NX	2.37866
3	NX	3.30983
3	NX	2.42013
3	NX	3.22463
3	NX	1.7419
3	NX	2.14309
3	NX	2.38186
3	NX	2.61685
3	NX	2.14861
3	NX	2.77385
3	NX	2.13625
3	NX	1.60284
3	NX	2.55572
3	NX	3.50495
3	NX	2.29108
3	NX	4.14632
3	NX	3.50424
3	NX	4.4378
3	NX	2.58507
3	NX	3.10652
3	NX	3.04272
3	NX	3.82565
3	NX	2.49426
3	NX	2.25367
3	NX	2.64632
3	NX	1.95505
1	XG	0.888216
1	XG	0.640662
1	XG	1.68473
1	XG	1.17606
1	XG	1.734
1	XG	1.40194
1	XG	0.925444
1	XG	1.58444
1	XG	1.02671
1	XG	0.90127
1	XG	1.25211
1	XG	1.02387
1	XG	1.42189
1	XG	1.07149
2	XG	2.08651
2	XG	2.47432
2	XG	3.15547
2	XG	1.7901
2	XG	2.40057
2	XG	2.13537
2	XG	1.55846
2	XG	1.18585
2	XG	2.02796
2	XG	1.72157
3	XG	1.95208
3	XG	1.51633
3	XG	3.00502
3	XG	2.91088
3	XG	1.78949
3	XG	2.19127
3	XG	2.27858
3	XG	2.12823
3	XG	2.24206
3	XG	1.38735
3	XG	2.04586
3	XG	1.63518
3	XG	1.80391
3	XG	1.64682
1	XX	0
2	XX	0
3	XX	0
