# Supplementary material for: The relative binding position of Nck and Grb2 adaptors impacts actin-based motility of Vaccinia virus
Source: eLife journal article supplement (doi:10.7554/elife.74655), 2022-07-07
Supplement: supp [file Fig2-suppl1B_source data.xlsx]

## Sheet: Sheet1
replicate	condition	actin tail length		replicate	condition	actin tail NUMBER
1	NX	3.48187		1	NX	16.2866
1	NX	3.73351		2	NX	18.3673
1	NX	3.00716		3	NX	20.1299
1	NX	1.42678		1	XN	19.2171
1	NX	2.72901		2	XN	21.1039
1	NX	1.77317		3	XN	20.9964
1	NX	2.56051
1	NX	1.97339
1	NX	3.47402
1	NX	1.0557
1	NX	2.38384
1	NX	1.97156
1	NX	3.4477
1	NX	3.20188
1	NX	2.74186
1	NX	1.80387
1	NX	2.13537
1	NX	1.50022
1	NX	2.4176
1	NX	2.66342
1	NX	2.61232
1	NX	1.67831
1	NX	1.8462
1	NX	1.24613
1	NX	2.94086
1	NX	2.34457
1	NX	2.16138
1	NX	3.10202
1	NX	3.53338
1	NX	3.04419
1	NX	3.56276
1	NX	2.44721
1	NX	2.28426
1	NX	2.19788
1	NX	1.41053
1	NX	2.32282
1	NX	2.78556
1	NX	2.16939
1	NX	1.99716
1	NX	3.62693
1	NX	2.56466
1	NX	2.65833
1	NX	2.29929
1	NX	2.32503
1	NX	2.88617
1	NX	1.33687
1	NX	1.96487
1	NX	1.07349
1	NX	2.42503
1	NX	2.62155
1	NX	2.42495
1	NX	3.28613
1	NX	1.82385
1	NX	2.97805
1	NX	2.51688
1	NX	1.78259
1	NX	2.04228
1	NX	3.23739
1	NX	1.88936
1	NX	1.20411
1	NX	1.3671
1	NX	2.89458
1	NX	1.72978
1	NX	2.07461
1	NX	1.29977
1	NX	1.95086
1	NX	3.22686
1	NX	2.34842
1	NX	2.7543
1	NX	2.23422
1	NX	2.612
1	NX	2.75162
1	NX	2.41137
2	NX	2.51736
2	NX	3.36845
2	NX	3.21076
2	NX	3.79777
2	NX	3.48881
2	NX	3.80327
2	NX	3.96025
2	NX	4.44893
2	NX	4.5848
2	NX	5.87999
2	NX	4.36897
2	NX	2.28347
2	NX	3.03736
2	NX	4.76687
2	NX	3.50819
2	NX	4.86907
2	NX	3.44066
2	NX	3.48391
2	NX	2.42842
2	NX	3.87569
2	NX	3.78706
2	NX	1.928
2	NX	1.49899
2	NX	3.41445
2	NX	0.714
2	NX	3.74768
2	NX	3.77757
2	NX	2.36263
2	NX	2.84264
2	NX	2.26685
2	NX	2.53715
2	NX	1.22002
2	NX	2.64781
2	NX	2.15476
2	NX	1.59331
2	NX	2.20779
2	NX	2.39485
2	NX	3.07259
2	NX	3.43875
2	NX	2.0636
2	NX	2.23027
2	NX	2.27579
2	NX	1.27026
2	NX	2.41817
2	NX	1.76328
2	NX	1.05066
2	NX	2.76608
2	NX	2.11224
2	NX	3.27631
2	NX	2.1564
2	NX	2.57039
2	NX	2.90555
2	NX	2.33318
2	NX	1.39071
2	NX	1.91929
2	NX	2.79934
2	NX	2.74763
2	NX	2.88413
2	NX	1.95197
2	NX	2.62263
2	NX	2.95206
2	NX	3.56188
2	NX	3.92374
2	NX	2.5167
2	NX	3.58227
2	NX	3.6204
2	NX	2.94758
2	NX	4.74226
2	NX	3.5456
2	NX	2.01043
2	NX	3.31211
2	NX	2.24767
3	NX	3.21014
3	NX	2.68505
3	NX	2.91751
3	NX	1.75124
3	NX	2.67475
3	NX	3.58326
3	NX	2.58101
3	NX	2.58009
3	NX	2.62925
3	NX	1.95789
3	NX	1.85293
3	NX	2.06213
3	NX	2.85733
3	NX	1.76725
3	NX	2.3511
3	NX	1.5403
3	NX	2.31489
3	NX	2.29551
3	NX	1.59671
3	NX	2.52766
3	NX	2.35324
3	NX	3.32398
3	NX	3.14599
3	NX	3.9831
3	NX	2.80775
3	NX	2.75196
3	NX	2.84376
3	NX	2.08366
3	NX	2.23003
3	NX	1.52806
3	NX	2.28205
3	NX	1.44085
3	NX	1.122
3	NX	1.74961
3	NX	2.59786
3	NX	2.243
3	NX	3.84785
3	NX	2.62952
3	NX	2.45207
3	NX	2.31813
3	NX	2.67729
3	NX	2.77701
3	NX	2.20031
3	NX	4.33686
3	NX	2.17472
3	NX	1.88458
3	NX	2.99795
3	NX	3.67668
3	NX	2.3675
3	NX	1.632
3	NX	2.18656
3	NX	3.98432
3	NX	2.37866
3	NX	3.30983
3	NX	2.42013
3	NX	3.22463
3	NX	1.7419
3	NX	2.14309
3	NX	2.38186
3	NX	2.61685
3	NX	2.14861
3	NX	2.77385
3	NX	2.13625
3	NX	1.60284
3	NX	2.55572
3	NX	3.50495
3	NX	2.29108
3	NX	4.14632
3	NX	3.50424
3	NX	4.4378
3	NX	2.58507
3	NX	3.10652
3	NX	3.04272
3	NX	3.82565
3	NX	2.49426
3	NX	2.25367
3	NX	2.64632
3	NX	1.95505
1	XN	2.8205
1	XN	2.36834
1	XN	2.09171
1	XN	1.47655
1	XN	1.57814
1	XN	2.52878
1	XN	1.91689
1	XN	3.47942
1	XN	1.27214
1	XN	1.47523
1	XN	1.67759
1	XN	1.29622
1	XN	1.6679
1	XN	1.89271
1	XN	2.27797
1	XN	2.10293
1	XN	1.34395
1	XN	1.14373
1	XN	1.80622
1	XN	2.34651
1	XN	1.18167
1	XN	1.51674
1	XN	1.28449
1	XN	2.77573
1	XN	2.79949
1	XN	1.38567
1	XN	1.86629
1	XN	4.19202
1	XN	2.08734
1	XN	2.96333
1	XN	3.14023
1	XN	1.19944
1	XN	1.32191
1	XN	1.75217
1	XN	1.46544
1	XN	1.04933
1	XN	1.2221
1	XN	1.62396
1	XN	2.03217
1	XN	0.969
1	XN	0.764144
1	XN	1.45419
1	XN	1.79739
1	XN	1.36746
1	XN	1.06131
1	XN	1.05869
1	XN	1.74998
1	XN	1.27939
1	XN	1.23604
1	XN	1.43815
1	XN	1.11821
1	XN	1.32163
1	XN	1.31989
1	XN	1.6253
1	XN	1.71645
1	XN	2.15449
1	XN	1.97196
1	XN	0.714
1	XN	1.19613
1	XN	1.54288
1	XN	1.11206
1	XN	1.65053
1	XN	1.26614
1	XN	1.38605
1	XN	0.762158
1	XN	1.55189
1	XN	1.64385
1	XN	2.36148
1	XN	4.05273
1	XN	1.55955
1	XN	2.78316
1	XN	1.68072
1	XN	1.40923
1	XN	1.56259
1	XN	1.7969
2	XN	2.04296
2	XN	2.40812
2	XN	2.9735
2	XN	3.19964
2	XN	1.67708
2	XN	2.89598
2	XN	3.49095
2	XN	1.92311
2	XN	1.88578
2	XN	2.3614
2	XN	2.14292
2	XN	1.71462
2	XN	1.99298
2	XN	4.22708
2	XN	2.32407
2	XN	2.24665
2	XN	2.10691
2	XN	2.70769
2	XN	1.32896
2	XN	1.15566
2	XN	0.727872
2	XN	3.80307
2	XN	3.05041
2	XN	2.80755
2	XN	4.28135
2	XN	3.83163
2	XN	2.50328
2	XN	3.80776
2	XN	2.142
2	XN	2.34671
2	XN	2.08213
2	XN	1.99522
2	XN	1.59803
2	XN	2.01583
2	XN	1.4686
2	XN	2.22686
2	XN	0.99756
2	XN	1.54255
2	XN	2.57866
2	XN	3.34397
2	XN	6.08093
2	XN	4.05807
2	XN	4.62019
2	XN	2.31193
2	XN	3.29684
2	XN	4.12141
2	XN	7.66224
2	XN	4.51921
2	XN	4.50942
2	XN	2.72534
2	XN	3.58459
2	XN	1.69759
2	XN	3.83489
2	XN	3.42425
2	XN	2.0928
2	XN	3.0235
2	XN	2.68907
2	XN	1.65019
2	XN	1.48325
2	XN	2.27994
2	XN	2.38789
2	XN	1.91013
2	XN	1.52006
2	XN	1.72172
2	XN	1.27216
2	XN	2.22739
2	XN	1.61123
2	XN	1.36497
2	XN	1.2789
2	XN	3.50121
2	XN	2.28747
2	XN	2.01926
2	XN	2.36818
2	XN	1.59471
2	XN	1.63884
2	XN	2.08394
2	XN	2.52098
2	XN	3.44157
2	XN	2.04537
2	XN	2.05371
2	XN	3.02926
2	XN	2.82276
3	XN	2.71412
3	XN	1.85885
3	XN	1.56825
3	XN	2.39231
3	XN	1.24522
3	XN	2.23033
3	XN	1.9635
3	XN	1.83416
3	XN	1.85344
3	XN	1.44932
3	XN	1.27806
3	XN	1.50878
3	XN	1.82845
3	XN	2.14231
3	XN	1.87221
3	XN	1.67943
3	XN	1.54408
3	XN	2.11344
3	XN	1.79938
3	XN	2.12364
3	XN	2.49206
3	XN	1.38332
3	XN	3.01685
3	XN	2.75706
3	XN	2.60488
3	XN	2.27001
3	XN	1.60293
3	XN	3.05164
3	XN	1.49614
3	XN	2.07978
3	XN	1.96676
3	XN	2.25216
3	XN	2.07682
3	XN	1.53908
3	XN	1.62772
3	XN	1.62821
3	XN	2.20727
3	XN	1.59296
3	XN	1.71602
3	XN	1.04218
3	XN	1.60689
3	XN	1.72033
3	XN	1.67934
3	XN	1.34629
3	XN	1.04218
3	XN	1.40547
3	XN	1.45018
3	XN	1.16194
3	XN	1.47805
3	XN	1.21112
3	XN	1.40563
3	XN	1.86644
3	XN	1.56177
3	XN	2.51789
3	XN	1.70892
3	XN	3.19459
3	XN	3.05345
3	XN	1.77614
3	XN	1.58667
3	XN	2.19308
3	XN	3.3351
3	XN	3.27757
3	XN	4.30744
3	XN	3.55333
3	XN	3.7275
3	XN	3.33648
3	XN	2.79684
3	XN	2.83451
3	XN	4.16872
3	XN	3.23903
3	XN	2.24962
3	XN	1.53
3	XN	2.95037
