# Supplementary material for: The relative binding position of Nck and Grb2 adaptors impacts actin-based motility of Vaccinia virus
Source: eLife journal article supplement (doi:10.7554/elife.74655), 2022-07-07
Supplement: supp [file Fig2-suppl1C_source data.xlsx]

## Sheet: Sheet1
replicate	condition	plaque size
1	orig	0.897318
1	orig	0.861334
1	orig	0.752614
1	orig	0.766906
1	orig	0.936621
1	orig	0.850615
1	orig	0.928964
1	orig	0.989449
1	orig	0.753635
1	orig	0.766906
2	orig	1.05044
2	orig	1.07979
2	orig	1.09102
2	orig	1.13568
2	orig	1.2245
2	orig	1.08949
2	orig	1.14742
2	orig	1.27605
2	orig	1.05376
2	orig	0.951168
3	orig	1.06601
3	orig	0.951168
3	orig	1.20306
3	orig	1.18188
3	orig	1.14462
3	orig	1.10914
3	orig	1.15712
3	orig	1.23853
3	orig	1.22679
3	orig	0.962397
1	backup	1.06346
1	backup	0.855974
1	backup	0.821521
1	backup	1.11654
1	backup	0.867459
1	backup	0.760781
1	backup	0.837854
1	backup	0.951168
1	backup	1.02799
1	backup	1.14538
2	backup	1.07341
2	backup	1.30132
2	backup	0.896808
2	backup	1.20638
2	backup	1.25283
2	backup	1.32071
2	backup	1.20076
2	backup	1.06678
2	backup	1.3031
2	backup	0.913397
3	backup	1.27886
3	backup	1.18188
3	backup	1.32888
3	backup	1.22679
3	backup	1.27605
3	backup	1.21812
3	backup	1.21812
3	backup	0.854954
3	backup	1.26457
3	backup	1.19413
