# Supplementary material for: The relative binding position of Nck and Grb2 adaptors impacts actin-based motility of Vaccinia virus
Source: eLife journal article supplement (doi:10.7554/elife.74655), 2022-07-07
Supplement: supp [file Fig2-suppl2A_source data.xlsx]

## Sheet: Sheet1
replicate	condition	actin tail length			replicate	condition	% actin tails
1	NG	4.57244			1	NG	24.6528
1	NG	3.47226			2	NG	17.193
1	NG	3.19927			3	NG	18
1	NG	2.36594			1	NN	28.4375
1	NG	1.92053			2	NN	23.6967
1	NG	3.9648			3	NN	27.7228
1	NG	1.75043			1	GG	0
1	NG	2.11242			2	GG	0
1	NG	2.58358			3	GG	0.888889
1	NG	5.52832
1	NG	5.55673
1	NG	5.39607
1	NG	3.85096
1	NG	4.50713
1	NG	7.79944
1	NG	4.54897
1	NG	3.22347
1	NG	4.48045
1	NG	3.56547
1	NG	3.87812
1	NG	1.33461
1	NG	2.65407
1	NG	3.35895
1	NG	3.13719
1	NG	3.62324
1	NG	4.03502
1	NG	3.85475
1	NG	5.56171
1	NG	3.87917
1	NG	3.8634
1	NG	3.52383
1	NG	4.13381
1	NG	3.00218
1	NG	4.59072
1	NG	3.24808
1	NG	3.3761
1	NG	5.2624
1	NG	2.58687
1	NG	3.37125
1	NG	5.99511
1	NG	3.23112
1	NG	4.6905
1	NG	3.45226
1	NG	3.23135
1	NG	3.33891
1	NG	4.45982
1	NG	4.34564
1	NG	2.8418
1	NG	2.20397
1	NG	4.97312
1	NG	3.05818
1	NG	3.59029
1	NG	2.79091
1	NG	4.64069
1	NG	3.20172
1	NG	2.26949
1	NG	2.41562
1	NG	4.116
1	NG	2.33895
1	NG	5.25013
1	NG	3.88307
1	NG	4.34878
1	NG	4.10961
1	NG	4.33288
1	NG	3.5744
1	NG	3.3504
1	NG	6.03606
1	NG	5.8524
1	NG	5.34785
1	NG	3.35632
1	NG	2.34139
1	NG	3.12995
1	NG	4.33874
1	NG	5.70363
1	NG	5.95964
1	NG	3.383
1	NG	4.55865
1	NG	5.74635
1	NG	3.15022
2	NG	3.06377
2	NG	3.25217
2	NG	5.54717
2	NG	6.39367
2	NG	4.04501
2	NG	2.9172
2	NG	4.73586
2	NG	5.50841
2	NG	3.39476
2	NG	5.77381
2	NG	3.23156
2	NG	4.29655
2	NG	4.15252
2	NG	4.87295
2	NG	4.20934
2	NG	3.69699
2	NG	5.41549
2	NG	5.08807
2	NG	3.37263
2	NG	3.24758
2	NG	2.69076
2	NG	7.28841
2	NG	4.41283
2	NG	6.61307
2	NG	4.61917
2	NG	4.77299
2	NG	5.56655
2	NG	4.53135
2	NG	2.91802
2	NG	4.69455
2	NG	5.68334
2	NG	7.84431
2	NG	6.26851
2	NG	5.75872
2	NG	7.52281
2	NG	5.67161
2	NG	5.96731
2	NG	6.48791
2	NG	5.64356
2	NG	4.93456
2	NG	4.25105
2	NG	4.63702
2	NG	7.89959
2	NG	3.72667
2	NG	4.66548
2	NG	3.73218
2	NG	4.25789
2	NG	3.88008
2	NG	4.61764
2	NG	3.89518
2	NG	4.12529
2	NG	2.99003
2	NG	3.13466
2	NG	2.62997
2	NG	2.89476
2	NG	2.38955
2	NG	2.96065
2	NG	4.97597
2	NG	5.41304
2	NG	3.53124
2	NG	1.8675
2	NG	4.68094
2	NG	4.59601
2	NG	3.56748
2	NG	3.52036
2	NG	3.72251
2	NG	4.78139
2	NG	3.74208
2	NG	3.18893
2	NG	4.37595
2	NG	3.80869
2	NG	5.9436
2	NG	4.01348
2	NG	4.67066
2	NG	6.10982
2	NG	2.35889
2	NG	4.45229
2	NG	3.96054
2	NG	4.5206
2	NG	5.94644
2	NG	2.92819
2	NG	5.10216
2	NG	3.6202
2	NG	3.82853
2	NG	4.63826
2	NG	3.46152
2	NG	4.0807
2	NG	4.72561
2	NG	3.15237
2	NG	2.42452
2	NG	4.21276
2	NG	2.90125
2	NG	3.21774
3	NG	5.31491
3	NG	3.85835
3	NG	5.16508
3	NG	5.48383
3	NG	6.43732
3	NG	6.79249
3	NG	5.36846
3	NG	4.79716
3	NG	5.99709
3	NG	4.1056
3	NG	3.76023
3	NG	6.44395
3	NG	2.12711
3	NG	5.457
3	NG	3.35774
3	NG	6.27963
3	NG	6.11225
3	NG	3.07081
3	NG	3.2947
3	NG	4.31939
3	NG	4.60918
3	NG	2.18443
3	NG	3.12222
3	NG	2.11313
3	NG	2.08733
3	NG	2.74074
3	NG	5.01473
3	NG	2.8355
3	NG	4.35367
3	NG	4.24514
3	NG	4.43139
3	NG	4.4829
3	NG	3.10437
3	NG	3.10447
3	NG	3.01084
3	NG	5.18211
3	NG	2.78654
3	NG	2.6879
3	NG	1.75195
3	NG	4.20883
3	NG	4.30828
3	NG	2.59243
3	NG	1.40617
3	NG	1.91311
3	NG	3.27104
3	NG	3.43597
3	NG	6.88316
3	NG	2.68546
3	NG	3.42904
3	NG	2.64812
3	NG	1.39393
3	NG	3.43112
3	NG	3.93321
3	NG	2.66996
3	NG	1.70299
3	NG	2.37501
3	NG	4.02662
3	NG	2.73293
3	NG	2.05049
3	NG	4.47568
3	NG	3.35099
3	NG	2.06721
3	NG	2.48875
3	NG	4.78206
3	NG	3.43052
3	NG	3.24073
3	NG	2.22303
3	NG	3.74562
3	NG	4.76556
3	NG	4.85995
3	NG	3.28899
3	NG	2.4082
3	NG	3.71039
3	NG	5.23292
3	NG	3.62568
3	NG	4.79476
3	NG	5.06243
3	NG	3.24736
3	NG	3.20267
1	NN	2.397
1	NN	3.78094
1	NN	3.89762
1	NN	4.08061
1	NN	3.40894
1	NN	2.31234
1	NN	3.01716
1	NN	3.55215
1	NN	3.07826
1	NN	3.45331
1	NN	1.989
1	NN	1.82366
1	NN	3.19811
1	NN	4.03043
1	NN	2.93597
1	NN	3.49401
1	NN	3.4578
1	NN	4.81705
1	NN	4.26839
1	NN	3.60366
1	NN	2.5193
1	NN	2.65139
1	NN	2.43607
1	NN	2.50604
1	NN	2.60498
1	NN	3.4937
1	NN	2.36773
1	NN	3.37712
1	NN	3.34672
1	NN	3.51196
1	NN	2.8813
1	NN	3.55898
1	NN	2.83988
1	NN	1.58192
1	NN	3.71555
1	NN	2.77195
1	NN	3.49279
1	NN	2.43902
1	NN	3.11896
1	NN	2.3816
1	NN	1.97921
1	NN	3.42332
1	NN	3.33693
1	NN	2.82744
1	NN	1.60038
1	NN	2.64547
1	NN	3.74942
1	NN	3.05745
1	NN	2.78246
1	NN	2.31336
1	NN	3.02083
1	NN	3.07775
1	NN	2.66863
1	NN	3.35294
1	NN	2.33835
1	NN	4.00352
1	NN	2.17543
1	NN	1.73798
1	NN	3.31922
1	NN	3.00666
1	NN	3.1396
1	NN	4.03311
1	NN	4.06624
1	NN	3.86368
1	NN	3.36133
1	NN	3.92647
1	NN	2.95406
1	NN	5.76282
1	NN	5.12494
1	NN	4.65131
1	NN	2.98444
1	NN	3.45357
1	NN	2.89628
1	NN	4.36685
1	NN	3.59501
1	NN	2.73481
1	NN	4.43504
1	NN	2.37594
1	NN	2.53503
1	NN	4.89785
1	NN	3.60942
1	NN	3.46682
1	NN	2.12178
1	NN	2.7653
1	NN	3.16531
1	NN	3.62635
1	NN	3.80227
1	NN	2.96385
1	NN	3.28524
1	NN	3.17653
1	NN	2.36773
1	NN	3.44308
1	NN	4.1197
1	NN	3.65087
1	NN	3.91453
1	NN	4.73069
1	NN	3.53834
1	NN	2.0336
1	NN	2.55141
1	NN	3.99407
1	NN	3.70028
2	NN	4.27727
2	NN	4.1259
2	NN	3.93618
2	NN	3.66109
2	NN	1.98665
2	NN	2.74421
2	NN	2.51848
2	NN	3.29266
2	NN	3.91537
2	NN	3.8708
2	NN	3.6516
2	NN	3.77839
2	NN	3.51013
2	NN	3.72351
2	NN	1.90046
2	NN	3.1214
2	NN	4.20515
2	NN	5.33531
2	NN	5.50504
2	NN	5.16997
2	NN	5.34215
2	NN	5.9009
2	NN	4.1206
2	NN	3.02665
2	NN	4.77778
2	NN	4.65895
2	NN	2.83376
2	NN	4.19455
2	NN	3.00808
2	NN	2.73054
2	NN	3.25951
2	NN	3.74677
2	NN	3.4682
2	NN	4.75922
2	NN	3.15863
2	NN	2.43454
2	NN	6.39805
2	NN	3.11936
2	NN	4.49279
2	NN	6.31686
2	NN	3.66802
2	NN	2.60702
2	NN	3.49942
2	NN	4.18802
2	NN	1.89863
2	NN	4.70243
2	NN	2.45867
2	NN	5.55105
2	NN	6.31375
2	NN	1.80761
2	NN	3.83728
2	NN	3.12216
2	NN	3.7071
2	NN	2.68951
2	NN	3.50757
2	NN	3.50441
2	NN	4.64863
2	NN	6.40109
2	NN	5.50184
2	NN	3.01559
2	NN	4.40605
2	NN	3.19596
2	NN	3.01016
2	NN	4.15142
2	NN	3.02834
2	NN	2.64347
2	NN	4.73753
2	NN	2.66011
2	NN	5.15746
2	NN	2.809
2	NN	2.52638
2	NN	2.23079
2	NN	2.54573
3	NN	3.84866
3	NN	4.12743
3	NN	5.21057
3	NN	4.07102
3	NN	4.13641
3	NN	3.79481
3	NN	2.85743
3	NN	3.9982
3	NN	3.05215
3	NN	3.36743
3	NN	2.85773
3	NN	3.3967
3	NN	3.03532
3	NN	3.22963
3	NN	1.62098
3	NN	2.9324
3	NN	3.04031
3	NN	1.96136
3	NN	5.12213
3	NN	4.81919
3	NN	2.75777
3	NN	4.38406
3	NN	3.41873
3	NN	1.37465
3	NN	2.08009
3	NN	4.08418
3	NN	3.48157
3	NN	3.08683
3	NN	1.7443
3	NN	2.50685
3	NN	2.05805
3	NN	3.09101
3	NN	4.2176
3	NN	4.93558
3	NN	2.99197
3	NN	3.03521
3	NN	4.13824
3	NN	2.53847
3	NN	4.44292
3	NN	4.33857
3	NN	1.78633
3	NN	2.31275
3	NN	1.56539
3	NN	2.43574
3	NN	3.42296
3	NN	3.62284
3	NN	3.33295
3	NN	3.24192
3	NN	5.86335
3	NN	4.06199
3	NN	3.04418
3	NN	5.79465
3	NN	4.36449
3	NN	3.95159
3	NN	4.47913
3	NN	5.40181
3	NN	4.18059
3	NN	3.2369
3	NN	3.41504
3	NN	2.82357
3	NN	1.428
3	NN	2.873
3	NN	2.40995
3	NN	3.82464
3	NN	3.10737
3	NN	1.64692
3	NN	4.22222
3	NN	3.03619
3	NN	1.93199
3	NN	1.9832
3	NN	5.14332
3	NN	3.94246
3	NN	3.10013
3	NN	4.26718
3	NN	3.02881
3	NN	2.93615
3	NN	3.04349
3	NN	1.90066
3	NN	3.77564
3	NN	2.74394
3	NN	2.99252
3	NN	2.36203
3	NN	2.24692
2	GG	0.789072
3	GG	1.27621
3	GG	2.3441
3	GG	1.67637
