# Supplementary material for: The relative binding position of Nck and Grb2 adaptors impacts actin-based motility of Vaccinia virus
Source: eLife journal article supplement (doi:10.7554/elife.74655), 2022-07-07
Supplement: supp [file Fig2-suppl2B_source data.xlsx]

## Sheet: Sheet1
replicate	condition	actin tail length		replicate	condition	% actin tails
1	A36 N-G 3x	4.9601		1	A36 N-G 3x	20.8333
1	A36 N-G 3x	1.92221		2	A36 N-G 3x	10.6667
1	A36 N-G 3x	3.23685		3	A36 N-G 3x	22.6667
1	A36 N-G 3x	2.2216		1	A36 G-N 3x	16.6667
1	A36 N-G 3x	3.68157		2	A36 G-N 3x	13.3333
1	A36 N-G 3x	3.55627		3	A36 G-N 3x	13.3333
1	A36 N-G 3x	3.8624
1	A36 N-G 3x	1.82937
1	A36 N-G 3x	1.86244
1	A36 N-G 3x	1.18575
1	A36 N-G 3x	2.78708
1	A36 N-G 3x	2.91692
1	A36 N-G 3x	3.0869
1	A36 N-G 3x	2.30803
1	A36 N-G 3x	1.89303
1	A36 N-G 3x	2.57408
1	A36 N-G 3x	1.92289
1	A36 N-G 3x	1.95266
1	A36 N-G 3x	2.44562
1	A36 N-G 3x	4.72778
1	A36 N-G 3x	1.8218
1	A36 N-G 3x	4.50182
1	A36 N-G 3x	3.68612
1	A36 N-G 3x	2.89563
1	A36 N-G 3x	2.53456
1	A36 N-G 3x	3.20447
1	A36 N-G 3x	2.1656
1	A36 N-G 3x	3.05006
1	A36 N-G 3x	2.89572
1	A36 N-G 3x	6.11415
1	A36 N-G 3x	2.78152
1	A36 N-G 3x	4.40492
1	A36 N-G 3x	2.71694
1	A36 N-G 3x	4.5413
1	A36 N-G 3x	3.84894
1	A36 N-G 3x	3.50831
1	A36 N-G 3x	3.99966
1	A36 N-G 3x	4.77498
1	A36 N-G 3x	4.65209
1	A36 N-G 3x	3.18904
1	A36 N-G 3x	3.63486
1	A36 N-G 3x	0.805355
1	A36 N-G 3x	2.39776
1	A36 N-G 3x	4.39723
1	A36 N-G 3x	5.1989
1	A36 N-G 3x	2.09045
1	A36 N-G 3x	3.44299
1	A36 N-G 3x	1.95076
1	A36 N-G 3x	1.52432
1	A36 N-G 3x	1.90715
1	A36 N-G 3x	4.12561
1	A36 N-G 3x	4.57615
1	A36 G-N 3x	2.47681
1	A36 G-N 3x	3.20361
1	A36 G-N 3x	3.41698
1	A36 G-N 3x	2.34221
1	A36 G-N 3x	2.90462
1	A36 G-N 3x	4.21868
1	A36 G-N 3x	4.5113
1	A36 G-N 3x	1.69308
1	A36 G-N 3x	2.73242
1	A36 G-N 3x	3.64341
1	A36 G-N 3x	2.96304
1	A36 G-N 3x	3.21608
1	A36 G-N 3x	1.95829
1	A36 G-N 3x	3.41658
1	A36 G-N 3x	3.31714
1	A36 G-N 3x	2.11179
1	A36 G-N 3x	1.73259
1	A36 G-N 3x	1.02
1	A36 G-N 3x	2.39485
1	A36 G-N 3x	1.86375
1	A36 G-N 3x	1.20957
1	A36 G-N 3x	1.08799
1	A36 G-N 3x	1.46364
1	A36 G-N 3x	1.25403
1	A36 G-N 3x	1.31267
1	A36 G-N 3x	3.40036
1	A36 G-N 3x	1.86365
1	A36 G-N 3x	2.63477
1	A36 G-N 3x	3.14212
1	A36 G-N 3x	3.15525
1	A36 G-N 3x	2.19157
1	A36 G-N 3x	1.72608
1	A36 G-N 3x	1.83221
1	A36 G-N 3x	2.24407
1	A36 G-N 3x	1.01209
1	A36 G-N 3x	2.77969
1	A36 G-N 3x	1.95835
1	A36 G-N 3x	1.47946
1	A36 G-N 3x	1.59991
1	A36 G-N 3x	3.72602
1	A36 G-N 3x	4.99988
1	A36 G-N 3x	5.44402
1	A36 G-N 3x	1.23689
1	A36 G-N 3x	1.40972
1	A36 G-N 3x	2.80953
1	A36 G-N 3x	1.40013
1	A36 G-N 3x	1.57816
1	A36 G-N 3x	1.45234
1	A36 G-N 3x	1.82284
1	A36 G-N 3x	1.27559
1	A36 G-N 3x	1.77542
1	A36 G-N 3x	2.31245
1	A36 G-N 3x	1.81674
1	A36 G-N 3x	1.67401
1	A36 G-N 3x	1.97876
1	A36 G-N 3x	1.44033
1	A36 G-N 3x	1.28632
1	A36 G-N 3x	1.28705
1	A36 G-N 3x	2.51723
1	A36 G-N 3x	1.64194
2	A36 N-G 3x	2.62554
2	A36 N-G 3x	3.79961
2	A36 N-G 3x	6.08399
2	A36 N-G 3x	3.16803
2	A36 N-G 3x	1.79819
2	A36 N-G 3x	7.14588
2	A36 N-G 3x	3.39713
2	A36 N-G 3x	3.14879
2	A36 N-G 3x	4.6819
2	A36 N-G 3x	2.77239
2	A36 N-G 3x	3.24259
2	A36 N-G 3x	5.36562
2	A36 N-G 3x	5.95258
2	A36 N-G 3x	2.24092
2	A36 N-G 3x	6.04393
2	A36 N-G 3x	2.04899
2	A36 N-G 3x	1.66474
2	A36 N-G 3x	5.06756
2	A36 N-G 3x	2.63192
2	A36 N-G 3x	3.26348
2	A36 N-G 3x	4.35245
2	A36 N-G 3x	1.76328
2	A36 N-G 3x	6.8016
2	A36 N-G 3x	1.55029
2	A36 N-G 3x	3.95422
2	A36 N-G 3x	1.95417
3	A36 N-G 3x	3.89356
3	A36 N-G 3x	4.36893
3	A36 N-G 3x	2.89066
3	A36 N-G 3x	3.38685
3	A36 N-G 3x	5.19132
3	A36 N-G 3x	3.16096
3	A36 N-G 3x	1.12998
3	A36 N-G 3x	4.13728
3	A36 N-G 3x	5.50713
3	A36 N-G 3x	3.84418
3	A36 N-G 3x	1.75055
3	A36 N-G 3x	3.63471
3	A36 N-G 3x	2.27644
3	A36 N-G 3x	1.50067
3	A36 N-G 3x	2.56646
3	A36 N-G 3x	2.38487
3	A36 N-G 3x	1.81461
3	A36 N-G 3x	2.07441
3	A36 N-G 3x	6.18718
3	A36 N-G 3x	2.17217
3	A36 N-G 3x	1.02
3	A36 N-G 3x	1.77463
3	A36 N-G 3x	3.45153
3	A36 N-G 3x	2.09638
3	A36 N-G 3x	2.91637
3	A36 N-G 3x	2.01949
3	A36 N-G 3x	3.11903
3	A36 N-G 3x	1.95734
3	A36 N-G 3x	2.12689
3	A36 N-G 3x	1.79204
3	A36 N-G 3x	1.85393
3	A36 N-G 3x	1.15266
3	A36 N-G 3x	1.79394
2	A36 G-N 3x	1.42653
2	A36 G-N 3x	1.38125
2	A36 G-N 3x	1.77601
2	A36 G-N 3x	1.34066
2	A36 G-N 3x	1.12024
2	A36 G-N 3x	2.2323
2	A36 G-N 3x	1.77837
2	A36 G-N 3x	2.70476
2	A36 G-N 3x	1.80813
2	A36 G-N 3x	2.45697
2	A36 G-N 3x	2.19157
2	A36 G-N 3x	1.93421
2	A36 G-N 3x	1.89263
2	A36 G-N 3x	2.30819
2	A36 G-N 3x	1.24055
2	A36 G-N 3x	1.06063
2	A36 G-N 3x	2.82757
2	A36 G-N 3x	2.67854
2	A36 G-N 3x	3.71363
2	A36 G-N 3x	1.31822
2	A36 G-N 3x	1.64589
2	A36 G-N 3x	2.65548
2	A36 G-N 3x	2.3431
2	A36 G-N 3x	2.00791
2	A36 G-N 3x	1.80813
2	A36 G-N 3x	1.60616
2	A36 G-N 3x	2.00219
2	A36 G-N 3x	1.8166
2	A36 G-N 3x	0.837324
2	A36 G-N 3x	1.41802
3	A36 G-N 3x	1.70467
3	A36 G-N 3x	1.94981
3	A36 G-N 3x	2.22133
3	A36 G-N 3x	1.69434
3	A36 G-N 3x	1.49692
3	A36 G-N 3x	1.31369
3	A36 G-N 3x	1.70329
3	A36 G-N 3x	1.66103
3	A36 G-N 3x	2.64361
3	A36 G-N 3x	2.70072
3	A36 G-N 3x	2.22085
3	A36 G-N 3x	3.0817
3	A36 G-N 3x	2.79829
3	A36 G-N 3x	2.46089
3	A36 G-N 3x	2.47
3	A36 G-N 3x	3.58084
3	A36 G-N 3x	2.48416
3	A36 G-N 3x	3.23196
3	A36 G-N 3x	2.73275
3	A36 G-N 3x	1.91005
3	A36 G-N 3x	2.50819
3	A36 G-N 3x	1.55429
3	A36 G-N 3x	3.20763
3	A36 G-N 3x	2.40359
3	A36 G-N 3x	2.31334
3	A36 G-N 3x	1.71825
3	A36 G-N 3x	1.32032
3	A36 G-N 3x	1.53726
3	A36 G-N 3x	1.224
3	A36 G-N 3x	0.576999
3	A36 G-N 3x	0.918
3	A36 G-N 3x	1.24399
3	A36 G-N 3x	1.16313
3	A36 G-N 3x	1.71323
3	A36 G-N 3x	1.30664
3	A36 G-N 3x	0.966158
3	A36 G-N 3x	0.612
