# Supplementary material for: The relative binding position of Nck and Grb2 adaptors impacts actin-based motility of Vaccinia virus
Source: eLife journal article supplement (doi:10.7554/elife.74655), 2022-07-07
Supplement: supp [file Fig2B_source data.xlsx]

## Sheet: 1-139vsSwap_SuperPlotsofData
replicate	condition	actin tail length				replicate	condition	actin tail number
1	N-G	4.99127				1	N-G	12.3028
1	N-G	4.93456				3	N-G	13.7712
1	N-G	4.45199				4	N-G	9.93711
1	N-G	4.36764				1	G-N	17.6039
1	N-G	3.68516				3	G-N	9.02655
1	N-G	4.40416				4	G-N	11.5861
1	N-G	6.68488
1	N-G	3.57367
1	N-G	5.24392
1	N-G	4.31409
1	N-G	4.70934
1	N-G	2.93383
1	N-G	3.85376
1	N-G	4.05623
1	N-G	5.39111
1	N-G	5.73995
1	N-G	3.83275
1	N-G	6.80085
1	N-G	4.07102
1	N-G	4.58898
1	N-G	6.51923
1	N-G	4.0853
1	N-G	2.86691
1	N-G	3.40843
1	N-G	5.66957
1	N-G	3.94291
1	N-G	4.42966
1	N-G	6.43855
1	N-G	7.21395
1	N-G	4.95842
1	N-G	4.69016
1	N-G	6.86582
1	N-G	4.87723
1	N-G	5.36061
1	N-G	4.08969
1	N-G	4.49065
1	N-G	5.01952
1	N-G	8.69203
1	N-G	6.69997
1	N-G	8.13715
1	N-G	6.48547
1	N-G	7.88868
1	N-G	2.95392
1	N-G	3.17108
1	N-G	2.54235
1	N-G	2.26389
1	N-G	2.07519
1	N-G	2.0297
1	N-G	2.23737
1	N-G	2.14445
1	N-G	2.90506
1	N-G	2.59223
1	N-G	2.78633
1	N-G	2.25808
1	N-G	3.81388
1	N-G	3.43964
1	N-G	4.36142
1	N-G	1.87751
1	N-G	2.61263
1	N-G	2.73013
1	N-G	4.52992
1	N-G	2.16974
1	N-G	3.11528
1	N-G	2.77389
1	N-G	3.54266
1	N-G	2.9528
1	N-G	3.78961
1	N-G	4.51411
1	N-G	3.15588
1	N-G	4.19302
1	N-G	3.66313
1	N-G	3.29531
1	N-G	4.81766
1	N-G	4.08245
1	N-G	4.84276
1	N-G	6.76566
1	N-G	5.17242
1	N-G	5.14202
1	N-G	9.46183
1	N-G	5.34133
1	N-G	4.02665
1	N-G	6.33593
1	N-G	6.7318
1	N-G	7.33757
1	N-G	6.49873
1	N-G	6.39571
3	N-G	5.83389
3	N-G	3.00869
3	N-G	2.90914
3	N-G	5.52911
3	N-G	3.17628
3	N-G	4.56052
3	N-G	6.25668
3	N-G	3.00196
3	N-G	3.99014
3	N-G	4.77574
3	N-G	3.11641
3	N-G	2.80408
3	N-G	3.64058
3	N-G	3.36651
3	N-G	5.28227
3	N-G	2.25848
3	N-G	3.15833
3	N-G	3.46392
3	N-G	6.824
3	N-G	7.09512
3	N-G	6.62347
3	N-G	5.71098
3	N-G	6.07226
3	N-G	6.03034
3	N-G	5.63407
3	N-G	2.10997
3	N-G	5.7121
3	N-G	2.77093
3	N-G	3.13109
3	N-G	2.90527
3	N-G	2.74798
3	N-G	5.21659
3	N-G	2.45698
3	N-G	4.63651
3	N-G	2.69841
3	N-G	5.59235
3	N-G	4.42088
3	N-G	6.23975
3	N-G	3.42995
3	N-G	2.6825
3	N-G	5.5436
3	N-G	5.16314
3	N-G	1.94891
3	N-G	4.60193
3	N-G	6.50658
3	N-G	6.59705
3	N-G	3.70076
3	N-G	6.4874
3	N-G	4.1822
3	N-G	6.8135
3	N-G	3.40486
3	N-G	5.27207
3	N-G	1.18891
3	N-G	2.35518
3	N-G	1.90638
3	N-G	3.46892
3	N-G	2.36191
3	N-G	3.1111
3	N-G	5.53136
3	N-G	3.62681
3	N-G	3.23534
3	N-G	3.41159
3	N-G	4.2127
3	N-G	4.67425
3	N-G	2.80082
3	N-G	5.09592
3	N-G	4.9266
4	N-G	4.24993
4	N-G	4.95598
4	N-G	4.18965
4	N-G	4.07602
4	N-G	3.76094
4	N-G	4.15171
4	N-G	3.32418
4	N-G	5.49821
4	N-G	3.97994
4	N-G	4.33072
4	N-G	5.54533
4	N-G	4.06837
4	N-G	4.28777
4	N-G	5.58807
4	N-G	4.7788
4	N-G	4.72546
4	N-G	4.40263
4	N-G	3.04572
4	N-G	4.55328
4	N-G	4.15028
4	N-G	6.75709
4	N-G	5.17834
4	N-G	3.49268
4	N-G	3.09529
4	N-G	3.80103
4	N-G	4.28512
4	N-G	3.41221
4	N-G	3.54725
4	N-G	3.62018
4	N-G	6.45272
4	N-G	4.26503
4	N-G	6.66407
4	N-G	5.87469
4	N-G	5.51137
4	N-G	4.25707
4	N-G	4.17088
4	N-G	5.35174
4	N-G	3.06959
4	N-G	5.48923
4	N-G	6.67233
4	N-G	4.06439
4	N-G	3.95525
4	N-G	4.57348
4	N-G	4.9776
4	N-G	5.25902
4	N-G	4.33255
4	N-G	7.1655
4	N-G	4.72546
4	N-G	6.80003
4	N-G	5.57155
4	N-G	4.00748
4	N-G	5.11652
4	N-G	3.68832
4	N-G	4.80797
4	N-G	3.09284
4	N-G	2.55836
4	N-G	4.42384
4	N-G	4.11162
4	N-G	4.34948
4	N-G	4.53217
4	N-G	5.02248
4	N-G	5.80033
4	N-G	6.52463
4	N-G	4.00442
4	N-G	3.60774
4	N-G	4.01166
4	N-G	4.82909
4	N-G	5.12744
4	N-G	5.11224
4	N-G	4.73872
4	N-G	4.5082
4	N-G	4.27074
4	N-G	4.23922
4	N-G	4.95465
4	N-G	3.59091
4	N-G	4.14742
4	N-G	3.68251
4	N-G	7.5173
4	N-G	5.3854
4	N-G	7.77597
4	N-G	3.51329
4	N-G	6.46129
4	N-G	5.43395
4	N-G	3.62324
4	N-G	5.87969
4	N-G	3.71851
4	N-G	5.05349
4	N-G	3.83173
4	N-G	3.91333
4	N-G	4.55542
4	N-G	4.07347
4	N-G	2.87018
4	N-G	5.15161
4	N-G	4.24055
4	N-G	3.80511
4	N-G	4.35091
4	N-G	3.46749
4	N-G	6.59991
4	N-G	5.75005
4	N-G	5.12764
4	N-G	7.13602
4	N-G	5.21169
4	N-G	4.65018
4	N-G	6.71976
4	N-G	5.09949
4	N-G	8.72253
4	N-G	5.10734
4	N-G	4.73637
4	N-G	5.42956
4	N-G	5.1202
4	N-G	4.39957
4	N-G	3.95525
4	N-G	3.51196
4	N-G	4.74769
4	N-G	4.81838
4	N-G	4.32368
4	N-G	8.19611
4	N-G	4.7736
1	G-N	3.15088
1	G-N	3.11732
1	G-N	3.59846
1	G-N	1.84906
1	G-N	3.1774
1	G-N	3.23768
1	G-N	4.30165
1	G-N	4.4929
1	G-N	4.25309
1	G-N	4.13957
1	G-N	3.70036
1	G-N	1.44799
1	G-N	2.5194
1	G-N	2.10528
1	G-N	2.71442
1	G-N	2.78848
1	G-N	2.74156
1	G-N	3.75952
1	G-N	2.72003
1	G-N	1.8615
1	G-N	2.01124
1	G-N	1.40342
1	G-N	1.9227
1	G-N	2.73982
1	G-N	2.77216
1	G-N	1.31213
1	G-N	3.23177
1	G-N	3.28165
1	G-N	2.43994
1	G-N	3.17944
1	G-N	1.8565
1	G-N	2.142
1	G-N	1.5608
1	G-N	2.22595
1	G-N	2.96851
1	G-N	1.5965
1	G-N	2.65751
1	G-N	3.94526
1	G-N	2.84896
1	G-N	2.94545
1	G-N	3.57377
1	G-N	3.66211
1	G-N	3.21881
1	G-N	3.0599
1	G-N	2.81642
1	G-N	5.3652
1	G-N	5.66161
1	G-N	3.76931
1	G-N	3.52583
1	G-N	4.20383
1	G-N	3.40864
1	G-N	2.42413
1	G-N	1.99339
1	G-N	3.96719
1	G-N	2.26052
1	G-N	3.42669
1	G-N	3.08611
1	G-N	3.77788
1	G-N	3.02012
1	G-N	2.81224
1	G-N	3.53858
1	G-N	4.41874
1	G-N	3.33958
1	G-N	3.07938
1	G-N	3.57653
1	G-N	2.67138
1	G-N	3.60437
1	G-N	4.72393
1	G-N	1.71319
1	G-N	4.16843
1	G-N	4.36407
1	G-N	3.36488
1	G-N	2.79837
1	G-N	2.23604
1	G-N	3.77114
1	G-N	2.79878
1	G-N	4.87876
1	G-N	2.66047
1	G-N	3.00747
1	G-N	2.93403
1	G-N	3.29491
1	G-N	2.8661
1	G-N	1.64669
1	G-N	1.89638
1	G-N	2.97157
3	G-N	3.24176
3	G-N	2.08723
3	G-N	1.64373
3	G-N	1.73369
3	G-N	1.37425
3	G-N	1.15127
3	G-N	2.93699
3	G-N	1.60946
3	G-N	1.86007
3	G-N	1.67647
3	G-N	2.44943
3	G-N	2.70545
3	G-N	3.96454
3	G-N	4.04338
3	G-N	2.65781
3	G-N	2.91281
3	G-N	2.02266
3	G-N	5.84633
3	G-N	3.80246
3	G-N	2.72983
3	G-N	2.76991
3	G-N	3.91558
3	G-N	2.07335
3	G-N	2.64568
3	G-N	6.22322
3	G-N	2.25206
3	G-N	2.611
3	G-N	1.93606
3	G-N	1.79306
3	G-N	3.7381
3	G-N	6.29513
3	G-N	4.06021
3	G-N	2.56051
3	G-N	2.30092
3	G-N	2.27899
3	G-N	3.0855
3	G-N	1.71482
3	G-N	1.75848
3	G-N	1.69667
3	G-N	2.21942
3	G-N	5.14172
3	G-N	3.90048
3	G-N	5.92365
3	G-N	2.39129
3	G-N	2.95443
3	G-N	1.66454
3	G-N	2.03878
3	G-N	1.41474
3	G-N	6.52504
3	G-N	3.5443
3	G-N	2.31193
3	G-N	1.122
3	G-N	4.03726
3	G-N	3.73034
3	G-N	3.60162
3	G-N	2.55867
3	G-N	1.7647
3	G-N	1.66393
3	G-N	2.85539
3	G-N	2.34998
3	G-N	2.66444
3	G-N	2.4787
3	G-N	2.66118
3	G-N	3.70178
3	G-N	1.71095
3	G-N	3.19199
4	G-N	2.44474
4	G-N	2.6266
4	G-N	2.17841
4	G-N	1.91862
4	G-N	1.6831
4	G-N	2.25818
4	G-N	2.51981
4	G-N	2.13323
4	G-N	3.0955
4	G-N	2.45473
4	G-N	2.65159
4	G-N	2.87793
4	G-N	3.43577
4	G-N	2.09906
4	G-N	3.59856
4	G-N	2.69362
4	G-N	2.20524
4	G-N	1.56784
4	G-N	1.78551
4	G-N	2.02603
4	G-N	2.40159
4	G-N	1.29815
4	G-N	1.84875
4	G-N	2.02286
4	G-N	3.63273
4	G-N	4.0545
4	G-N	2.66659
4	G-N	3.24278
4	G-N	2.93495
4	G-N	2.81928
4	G-N	2.0755
4	G-N	2.20667
4	G-N	1.60803
4	G-N	2.44229
4	G-N	2.74237
4	G-N	2.98044
4	G-N	3.40772
4	G-N	3.27461
4	G-N	3.27522
4	G-N	2.98493
4	G-N	2.2643
4	G-N	2.61406
4	G-N	3.40088
4	G-N	3.02848
4	G-N	3.02328
4	G-N	4.16354
4	G-N	3.4325
4	G-N	2.92322
4	G-N	2.87446
4	G-N	2.08559
4	G-N	1.73726
4	G-N	2.01022
4	G-N	2.02256
4	G-N	1.53357
4	G-N	1.81774
4	G-N	2.76604
4	G-N	2.79827
4	G-N	1.88751
4	G-N	1.73023
4	G-N	2.23737
4	G-N	2.44637
4	G-N	2.30816
4	G-N	2.28919
4	G-N	1.13669
4	G-N	1.95126
4	G-N	2.20779
4	G-N	2.64435
4	G-N	2.13384
4	G-N	2.24594
4	G-N	1.87109
4	G-N	2.30122
4	G-N	2.13761
4	G-N	1.80968
4	G-N	1.93943
4	G-N	2.44565
4	G-N	3.19219
4	G-N	1.6981
4	G-N	1.8413
4	G-N	2.42974
4	G-N	4.12794
4	G-N	3.14364
4	G-N	2.56255
4	G-N	4.67599
4	G-N	3.8402
4	G-N	2.77338
4	G-N	2.7031
4	G-N	2.31275
4	G-N	1.60222
4	G-N	1.06009
4	G-N	1.76052
4	G-N	1.63883
4	G-N	1.87894
4	G-N	2.87589
4	G-N	2.22064
4	G-N	1.88945
4	G-N	1.83202
4	G-N	2.17648
4	G-N	2.27164
4	G-N	2.44025
4	G-N	2.41057
4	G-N	2.32468
4	G-N	1.24307
4	G-N	1.64822
4	G-N	2.30438
4	G-N	3.05806
4	G-N	2.44555
4	G-N	2.82397
4	G-N	2.19769
4	G-N	3.50911
4	G-N	4.87631
4	G-N	5.22719
4	G-N	3.46576
4	G-N	3.65558
4	G-N	1.5555
4	G-N	1.16831
4	G-N	2.33886
4	G-N	2.79368
