# Supplementary material for: The relative binding position of Nck and Grb2 adaptors impacts actin-based motility of Vaccinia virus
Source: eLife journal article supplement (doi:10.7554/elife.74655), 2022-07-07
Supplement: supp [file Fig2C_source data.xlsx]

## Sheet: Sheet1
replicate	condition	virus speed
3	N-G	0.117
3	N-G	0.286
3	N-G	0.318
3	N-G	0.302
3	N-G	0.268
3	N-G	0.197
3	N-G	0.108
3	N-G	0.207
3	N-G	0.25
3	N-G	0.24
3	N-G	0.223
3	N-G	0.251
3	N-G	0.174
3	N-G	0.079
3	N-G	0.137
3	N-G	0.216
3	N-G	0.151
3	N-G	0.206
3	N-G	0.236
3	N-G	0.203
3	N-G	0.238
3	N-G	0.182
3	N-G	0.194
3	N-G	0.19
3	N-G	0.204
3	N-G	0.179
3	G-N	0.154
3	G-N	0.256
3	G-N	0.129
3	G-N	0.119
3	G-N	0.151
3	G-N	0.096
3	G-N	0.083
3	G-N	0.129
3	G-N	0.2
3	G-N	0.108
3	G-N	0.118
3	G-N	0.156
3	G-N	0.076
3	G-N	0.117
3	G-N	0.129
3	G-N	0.146
3	G-N	0.073
3	G-N	0.133
3	G-N	0.129
3	G-N	0.145
3	G-N	0.112
3	G-N	0.157
3	G-N	0.136
3	G-N	0.186
3	G-N	0.101
3	G-N	0.137
3	G-N	0.194
2	N-G	0.154
2	N-G	0.182
2	N-G	0.129
2	N-G	0.108
2	N-G	0.132
2	N-G	0.139
2	N-G	0.229
2	N-G	0.153
2	N-G	0.17
2	N-G	0.191
2	N-G	0.125
2	N-G	0.176
2	N-G	0.184
2	N-G	0.225
2	N-G	0.243
2	N-G	0.272
2	N-G	0.219
2	N-G	0.183
2	N-G	0.144
2	N-G	0.109
2	N-G	0.122
2	N-G	0.125
2	N-G	0.226
2	N-G	0.136
2	N-G	0.16
2	N-G	0.127
2	N-G	0.142
2	N-G	0.145
2	G-N	0.131
2	G-N	0.139
2	G-N	0.138
2	G-N	0.116
2	G-N	0.125
2	G-N	0.12
2	G-N	0.15
2	G-N	0.141
2	G-N	0.132
2	G-N	0.111
2	G-N	0.145
2	G-N	0.134
2	G-N	0.116
2	G-N	0.107
2	G-N	0.123
2	G-N	0.159
2	G-N	0.14
2	G-N	0.115
2	G-N	0.143
2	G-N	0.105
2	G-N	0.143
2	G-N	0.114
2	G-N	0.107
2	G-N	0.119
2	G-N	0.121
1	N-G	0.168
1	N-G	0.241
1	N-G	0.229
1	N-G	0.248
1	N-G	0.165
1	N-G	0.23
1	N-G	0.235
1	N-G	0.258
1	N-G	0.192
1	N-G	0.213
1	N-G	0.204
1	N-G	0.162
1	N-G	0.111
1	N-G	0.145
1	N-G	0.111
1	N-G	0.331
1	N-G	0.188
1	N-G	0.221
1	N-G	0.158
1	N-G	0.236
1	N-G	0.257
1	N-G	0.19
1	N-G	0.245
1	N-G	0.221
1	N-G	0.173
1	N-G	0.146
1	N-G	0.207
1	N-G	0.337
1	G-N	0.166
1	G-N	0.095
1	G-N	0.1
1	G-N	0.086
1	G-N	0.097
1	G-N	0.112
1	G-N	0.134
1	G-N	0.083
1	G-N	0.182
1	G-N	0.077
1	G-N	0.105
1	G-N	0.136
1	G-N	0.097
1	G-N	0.104
1	G-N	0.101
1	G-N	0.08
1	G-N	0.09
1	G-N	0.122
1	G-N	0.112
1	G-N	0.107
1	G-N	0.111
1	G-N	0.099
1	G-N	0.067
1	G-N	0.158
1	G-N	0.093
1	G-N	0.09
1	G-N	0.071
1	G-N	0.11
1	G-N	0.07
1	G-N	0.098
