# Supplementary material for: The relative binding position of Nck and Grb2 adaptors impacts actin-based motility of Vaccinia virus
Source: eLife journal article supplement (doi:10.7554/elife.74655), 2022-07-07
Supplement: supp [file Fig2D_source data.xlsx]

## Sheet: Sheet1
replicate	condition	plaque size
2	N-G	1.4547
2	N-G	1.40366
2	N-G	1.19949
2	N-G	1.35261
2	N-G	1.4547
2	N-G	1.4547
2	N-G	0.995319
2	N-G	1.5823
2	N-G	1.40366
2	N-G	1.40366
2	N-G	1.5823
2	N-G	1.19949
2	N-G	1.25053
2	N-G	1.53126
2	N-G	1.30157
2	N-G	1.60782
2	N-G	1.27605
2	N-G	1.60782
2	N-G	1.5823
2	N-G	1.32709
2	N-G	1.53126
2	N-G	1.25053
2	N-G	1.48022
2	N-G	1.19949
2	N-G	1.37813
2	N-G	1.4547
3	N-G	1.35261
3	N-G	1.65887
3	N-G	1.22501
3	N-G	1.5823
3	N-G	1.19949
3	N-G	1.17397
3	N-G	1.30157
3	N-G	1.07188
3	N-G	1.48022
3	N-G	1.35261
3	N-G	1.12292
3	N-G	0.76563
3	N-G	0.842193
3	N-G	1.07188
3	N-G	1.27605
3	N-G	1.19949
3	N-G	1.48022
3	N-G	1.40366
3	N-G	1.37813
3	N-G	1.50574
3	N-G	0.816672
3	N-G	1.40366
3	N-G	1.32709
3	N-G	1.37813
3	N-G	1.30157
2	G-N	1.0974
2	G-N	1.02084
2	G-N	1.12292
2	G-N	0.995319
2	G-N	0.944277
2	G-N	1.02084
2	G-N	1.25053
2	G-N	1.19949
2	G-N	0.918756
2	G-N	0.944277
2	G-N	0.995319
2	G-N	0.842193
2	G-N	1.17397
2	G-N	1.07188
2	G-N	0.740109
2	G-N	1.02084
2	G-N	1.14844
2	G-N	0.893235
2	G-N	1.07188
2	G-N	0.944277
2	G-N	1.0974
2	G-N	1.02084
3	G-N	1.19949
3	G-N	0.995319
3	G-N	1.07188
3	G-N	1.07188
3	G-N	1.19949
3	G-N	1.19949
3	G-N	1.14844
3	G-N	1.37813
3	G-N	1.22501
3	G-N	1.19949
3	G-N	1.0974
3	G-N	1.25053
3	G-N	1.22501
3	G-N	1.22501
3	G-N	1.22501
3	G-N	1.14844
3	G-N	0.944277
3	G-N	0.791151
3	G-N	1.19949
3	G-N	0.816672
3	G-N	0.944277
1	N-G	1.40442
1	N-G	1.38885
1	N-G	0.63241
1	N-G	1.40442
1	N-G	1.52182
1	N-G	0.970819
1	N-G	1.69817
1	N-G	1.44628
1	N-G	1.49119
1	N-G	1.50753
1	N-G	1.3618
1	N-G	1.55244
1	N-G	1.50855
1	N-G	1.62135
1	N-G	1.42662
1	N-G	1.47665
1	G-N	1.40442
1	G-N	1.07597
1	G-N	1.10914
1	G-N	1.06346
1	G-N	0.544618
1	G-N	0.628072
1	G-N	1.17958
1	G-N	1.00374
1	G-N	0.995829
1	G-N	1.07112
1	G-N	0.95959
1	G-N	0.608931
1	G-N	1.18647
1	G-N	1.12369
1	G-N	1.17039
1	G-N	0.794724
1	G-N	1.23343
1	G-N	1.12369
