# Supplementary material for: The relative binding position of Nck and Grb2 adaptors impacts actin-based motility of Vaccinia virus
Source: eLife journal article supplement (doi:10.7554/elife.74655), 2022-07-07
Supplement: supp [file Fig3C_source data.xlsx]

## Sheet: Sheet1
replicate	condition	actin tail number
1	parental	16.6667
2	parental	23.1132
3	parental	26.9231
1	null	0
2	null	0
3	null	0
