# Supplementary material for: The relative binding position of Nck and Grb2 adaptors impacts actin-based motility of Vaccinia virus
Source: eLife journal article supplement (doi:10.7554/elife.74655), 2022-07-07
Supplement: supp [file Fig3D_source data.xlsx]

## Sheet: Sheet1
replicate	condition	actin tail length		replicate	condition	actin tail number
3	hybrid NG	1.61084		3	hybrid N-G	21.831
3	hybrid NG	4.49038		3	Y96F	0.724638
3	hybrid NG	6.0647		3	Y100F	17.3611
3	hybrid NG	4.27141		3	Y116F	8.63309
3	hybrid NG	1.27275		2	hybrid N-G	17.3228
3	hybrid NG	1.731		2	Y96F	1
3	hybrid NG	4.48632		2	Y100F	21.4765
3	hybrid NG	5.93939		2	Y116F	1.66667
3	hybrid NG	1.55024		1	hybrid N-G	28.8288
3	hybrid NG	2.43407		1	Y96F	2
3	hybrid NG	2.33066		1	Y100F	13.3929
3	hybrid NG	3.56318		1	Y116F	12
3	hybrid NG	6.41731
3	hybrid NG	6.72311
3	hybrid NG	5.43077
3	hybrid NG	7.68832
3	hybrid NG	3.84815
3	hybrid NG	5.75694
3	hybrid NG	5.42966
3	hybrid NG	5.07404
3	hybrid NG	6.79404
3	hybrid NG	3.887
3	hybrid NG	4.93858
3	hybrid NG	4.54359
3	hybrid NG	2.92546
3	hybrid NG	3.90147
3	hybrid NG	3.47996
3	hybrid NG	1.91735
3	hybrid NG	2.69654
3	hybrid NG	4.8549
3	hybrid NG	4.14868
3	hybrid NG	1.04876
3	hybrid NG	4.05501
3	hybrid NG	1.22504
3	hybrid NG	7.34673
3	hybrid NG	4.37619
3	hybrid NG	3.63284
3	hybrid NG	4.10108
3	hybrid NG	1.73165
3	hybrid NG	3.8339
3	hybrid NG	2.38291
3	hybrid NG	3.87787
3	hybrid NG	1.53331
3	hybrid NG	2.04951
3	hybrid NG	3.95445
3	hybrid NG	3.25134
3	Y96F	1.04876
3	Y96F	2.08533
3	Y96F	2.09336
3	Y96F	0.871488
3	Y100F	3.43321
3	Y100F	5.09301
3	Y100F	4.69665
3	Y100F	2.4503
3	Y100F	4.62772
3	Y100F	1.69299
3	Y100F	3.20467
3	Y100F	5.46183
3	Y100F	5.81654
3	Y100F	7.20109
3	Y100F	5.28485
3	Y100F	3.25642
3	Y100F	4.00684
3	Y100F	2.78938
3	Y100F	2.05371
3	Y100F	1.43402
3	Y100F	3.37153
3	Y100F	5.48352
3	Y100F	6.91766
3	Y100F	6.40237
3	Y100F	4.33929
3	Y100F	3.55507
3	Y100F	5.15457
3	Y100F	5.29725
3	Y100F	5.62728
3	Y100F	4.01152
3	Y100F	2.1155
3	Y100F	3.09525
3	Y100F	2.90734
3	Y100F	2.63544
3	Y100F	2.60756
3	Y100F	1.26893
3	Y100F	3.85119
3	Y100F	6.08854
3	Y100F	4.2795
3	Y100F	4.80377
3	Y100F	4.02073
3	Y100F	5.72554
3	Y100F	3.15969
3	Y100F	5.44582
3	Y100F	3.17474
3	Y100F	5.77589
3	Y100F	5.50369
3	Y100F	5.11663
3	Y100F	1.5236
3	Y100F	2.27192
3	Y116F	2.71547
3	Y116F	1.86762
3	Y116F	4.78458
3	Y116F	2.50561
3	Y116F	2.76324
3	Y116F	1.16298
3	Y116F	2.71324
3	Y116F	1.224
3	Y116F	2.19903
3	Y116F	1.41682
3	Y116F	2.15303
3	Y116F	1.95294
3	Y116F	3.71453
3	Y116F	3.43072
3	Y116F	1.98838
3	Y116F	1.4829
3	Y116F	3.07802
3	Y116F	1.7368
3	Y116F	3.86143
3	Y116F	1.14933
3	Y116F	1.71634
3	Y116F	2.47923
3	Y116F	1.56841
3	Y116F	4.01974
2	hybrid NG	2.99255
2	hybrid NG	3.46065
2	hybrid NG	2.28786
2	hybrid NG	6.94074
2	hybrid NG	2.4971
2	hybrid NG	4.56106
2	hybrid NG	2.17357
2	hybrid NG	3.51424
2	hybrid NG	3.14487
2	hybrid NG	2.35384
2	hybrid NG	4.55501
2	hybrid NG	4.99207
2	hybrid NG	1.90634
2	hybrid NG	4.72524
2	hybrid NG	3.71536
2	hybrid NG	1.40161
2	hybrid NG	3.27089
2	hybrid NG	3.32801
2	hybrid NG	1.85426
2	hybrid NG	1.98369
2	hybrid NG	2.35419
2	hybrid NG	1.86339
2	hybrid NG	2.10514
2	hybrid NG	2.69366
2	hybrid NG	5.29762
2	hybrid NG	5.62249
2	hybrid NG	2.77225
2	hybrid NG	2.24874
2	hybrid NG	1.25307
2	hybrid NG	4.65511
2	hybrid NG	3.54801
2	hybrid NG	1.01824
2	hybrid NG	2.07539
2	hybrid NG	4.41905
2	hybrid NG	1.98253
2	hybrid NG	2.29471
2	hybrid NG	2.20365
2	hybrid NG	3.5704
2	hybrid NG	3.52055
2	hybrid NG	4.63003
2	hybrid NG	4.65636
2	hybrid NG	6.15175
2	hybrid NG	4.20657
2	hybrid NG	1.61177
2	hybrid NG	1.85002
2	hybrid NG	2.08968
2	Y96F	2.09582
2	Y96F	2.34755
2	Y96F	1.47021
2	Y96F	2.84635
2	Y100F	2.82395
2	Y100F	3.00445
2	Y100F	5.05287
2	Y100F	5.2124
2	Y100F	4.73677
2	Y100F	3.10323
2	Y100F	4.70021
2	Y100F	5.25597
2	Y100F	4.82517
2	Y100F	2.22147
2	Y100F	4.48437
2	Y100F	2.31552
2	Y100F	2.81387
2	Y100F	2.80471
2	Y100F	3.69122
2	Y100F	2.21721
2	Y100F	2.70967
2	Y100F	7.04741
2	Y100F	4.47263
2	Y100F	7.03957
2	Y100F	5.29142
2	Y100F	4.6415
2	Y100F	4.3596
2	Y100F	1.29291
2	Y100F	3.96418
2	Y100F	2.353
2	Y100F	2.58912
2	Y100F	2.71023
2	Y100F	3.75044
2	Y100F	4.33103
2	Y100F	2.78585
2	Y100F	4.13539
2	Y100F	2.51775
2	Y100F	1.86995
2	Y100F	4.74197
2	Y100F	6.50195
2	Y100F	4.21666
2	Y100F	5.08433
2	Y100F	3.22366
2	Y100F	2.58338
2	Y100F	3.04688
2	Y100F	4.08885
2	Y100F	3.3683
2	Y100F	2.95019
2	Y100F	3.25147
2	Y100F	4.22851
2	Y116F	1.73469
2	Y116F	3.70584
2	Y116F	1.17369
2	Y116F	2.35661
1	hybrid NG	1.47616
1	hybrid NG	2.46601
1	hybrid NG	1.25383
1	hybrid NG	2.7312
1	hybrid NG	2.31254
1	hybrid NG	1.42679
1	hybrid NG	2.62924
1	hybrid NG	2.54716
1	hybrid NG	4.91202
1	hybrid NG	5.18847
1	hybrid NG	5.73584
1	hybrid NG	4.56884
1	hybrid NG	3.2241
1	hybrid NG	2.30106
1	hybrid NG	2.75192
1	hybrid NG	2.86698
1	hybrid NG	3.07417
1	hybrid NG	6.90424
1	hybrid NG	4.57729
1	hybrid NG	3.66731
1	hybrid NG	4.35681
1	hybrid NG	2.66361
1	hybrid NG	5.02207
1	hybrid NG	3.63477
1	hybrid NG	3.31659
1	hybrid NG	3.36424
1	hybrid NG	3.37644
1	hybrid NG	2.56979
1	hybrid NG	2.59406
1	hybrid NG	3.36042
1	hybrid NG	5.34816
1	Y96F	1.632
1	Y96F	1.71845
1	Y96F	2.14747
1	Y96F	2.11209
1	Y96F	2.89422
1	Y96F	2.30067
1	Y96F	2.14289
1	Y100F	4.8176
1	Y100F	2.82781
1	Y100F	2.60579
1	Y100F	3.18905
1	Y100F	2.60095
1	Y100F	2.75659
1	Y100F	2.59897
1	Y100F	4.16349
1	Y100F	2.73006
1	Y100F	2.93672
1	Y100F	3.13355
1	Y100F	5.24869
1	Y100F	1.65801
1	Y100F	2.48606
1	Y100F	3.84461
1	Y100F	2.8218
1	Y100F	4.48539
1	Y100F	3.88985
1	Y100F	3.17015
1	Y100F	2.57022
1	Y100F	5.8635
1	Y100F	4.54774
1	Y100F	2.40594
1	Y100F	4.02512
1	Y100F	4.21339
1	Y100F	3.88847
1	Y100F	1.66377
1	Y100F	4.26462
1	Y100F	3.96881
1	Y100F	3.32017
1	Y100F	5.68354
1	Y100F	2.82784
1	Y100F	1.95304
1	Y100F	2.76097
1	Y100F	2.76277
1	Y100F	4.5377
1	Y100F	4.30996
1	Y100F	1.74702
1	Y100F	2.59325
1	Y116F	2.20238
1	Y116F	3.15148
1	Y116F	2.51818
1	Y116F	2.89985
1	Y116F	1.0866
1	Y116F	1.90419
1	Y116F	2.21692
1	Y116F	1.78951
1	Y116F	2.37894
1	Y116F	3.70803
1	Y116F	5.05454
1	Y116F	1.4771
1	Y116F	1.40653
1	Y116F	1.18248
1	Y116F	2.07874
1	Y116F	3.66736
1	Y116F	3.57523
1	Y116F	3.49892
1	Y116F	2.67952
1	Y116F	2.77098
1	Y116F	2.15091
