# Supplementary material for: The relative binding position of Nck and Grb2 adaptors impacts actin-based motility of Vaccinia virus
Source: eLife journal article supplement (doi:10.7554/elife.74655), 2022-07-07
Supplement: supp [file Fig3E_source data.xlsx]

## Sheet: Sheet1
replicate	condition	actin tail number
1	hybrid NG	21.5686
2	hybrid NG	22.5806
3	hybrid NG	22.449
1	Y96,116F	0
2	Y96,116F	0
3	Y96,116F	0
