# Supplementary material for: The relative binding position of Nck and Grb2 adaptors impacts actin-based motility of Vaccinia virus
Source: eLife journal article supplement (doi:10.7554/elife.74655), 2022-07-07
Supplement: supp [file Fig4C_source data.xlsx]

## Sheet: Sheet1
replicate	condition	actin tail length			replicate	condition	actin tail number
4	chimera	3.89748			4	chimera	19.9005
4	chimera	2.47287			3	chimera	24.5
4	chimera	6.25064			2	chimera	16.2791
4	chimera	4.90517			1	chimera	17.9104
4	chimera	3.55509			4	swap	22.561
4	chimera	5.84019			3	swap	13.5
4	chimera	6.83974			2	swap	15.859
4	chimera	2.35418			1	swap	18.75
4	chimera	2.09299
4	chimera	3.61159
4	chimera	3.38199
4	chimera	1.64357
4	chimera	1.82977
4	chimera	0.998774
4	chimera	2.1266
4	chimera	3.07038
4	chimera	4.45091
4	chimera	3.16073
4	chimera	1.57839
4	chimera	1.29097
4	chimera	3.55758
4	chimera	3.38797
4	chimera	2.307
4	chimera	1.84828
4	chimera	1.68243
4	chimera	3.81604
4	chimera	4.3422
4	chimera	4.1111
4	chimera	3.50953
4	chimera	2.60444
4	chimera	3.54105
4	chimera	3.2327
4	chimera	2.20867
4	chimera	2.79394
4	chimera	5.46717
4	chimera	2.90454
4	chimera	2.66565
4	chimera	1.56857
4	chimera	1.95875
4	chimera	2.28505
4	chimera	3.2346
4	chimera	2.54361
4	chimera	2.54069
4	chimera	3.62517
4	chimera	3.61799
4	chimera	3.9528
4	chimera	2.40882
4	chimera	2.87618
4	chimera	1.67894
4	chimera	2.00495
4	chimera	4.87317
4	chimera	3.06654
4	chimera	4.31211
4	chimera	1.41668
4	chimera	2.985
4	chimera	2.86818
4	chimera	2.34793
4	chimera	3.20016
4	chimera	3.42791
4	chimera	3.50057
4	chimera	4.17257
4	chimera	3.41358
4	chimera	2.88342
4	chimera	3.46519
4	chimera	1.87048
4	chimera	2.39632
4	chimera	5.75618
4	chimera	2.714
4	chimera	2.65252
4	chimera	6.37223
4	chimera	1.01446
4	chimera	6.36874
4	chimera	1.77389
4	chimera	5.56049
4	chimera	1.13289
4	chimera	2.28319
4	chimera	1.7321
4	chimera	3.4481
4	chimera	2.35856
4	chimera	3.70178
4	chimera	4.25002
4	chimera	3.78427
4	chimera	4.31026
4	chimera	3.19131
4	chimera	2.01716
3	chimera	3.18874
3	chimera	3.96694
3	chimera	2.862
3	chimera	2.36794
3	chimera	3.45212
3	chimera	4.67737
3	chimera	2.84882
3	chimera	2.58948
3	chimera	3.62889
3	chimera	3.92477
3	chimera	2.74478
3	chimera	2.68655
3	chimera	1.76638
3	chimera	5.82474
3	chimera	4.96411
3	chimera	4.94344
3	chimera	4.92135
3	chimera	3.63206
3	chimera	2.89377
3	chimera	3.07414
3	chimera	2.17123
3	chimera	1.75138
3	chimera	2.2936
3	chimera	4.3895
3	chimera	2.59652
3	chimera	1.57284
3	chimera	2.14861
3	chimera	4.28078
3	chimera	3.15821
3	chimera	6.80879
3	chimera	3.73948
3	chimera	2.49596
3	chimera	1.91781
3	chimera	6.50579
3	chimera	7.70926
3	chimera	5.00691
3	chimera	1.84406
3	chimera	6.38508
3	chimera	3.30358
3	chimera	2.90262
3	chimera	2.1893
3	chimera	3.03591
3	chimera	4.31195
3	chimera	4.3258
3	chimera	3.90627
3	chimera	5.25189
3	chimera	4.68068
3	chimera	2.10997
3	chimera	3.52708
3	chimera	2.89294
3	chimera	1.77846
3	chimera	2.32455
3	chimera	2.94201
3	chimera	2.72309
3	chimera	1.73535
3	chimera	4.17653
3	chimera	1.35694
3	chimera	1.27343
3	chimera	3.71538
3	chimera	3.33251
3	chimera	1.29839
3	chimera	2.38047
3	chimera	4.57792
3	chimera	2.7861
3	chimera	4.39311
3	chimera	2.22776
3	chimera	2.41053
3	chimera	3.16344
3	chimera	1.31355
3	chimera	5.23846
3	chimera	2.93752
3	chimera	2.55563
3	chimera	2.05706
3	chimera	4.26483
3	chimera	2.88725
3	chimera	1.33087
3	chimera	2.85951
3	chimera	4.38279
3	chimera	2.59011
3	chimera	1.99708
3	chimera	2.3013
3	chimera	1.56779
3	chimera	3.74086
3	chimera	2.99617
2	chimera	5.24588
2	chimera	3.65102
2	chimera	5.24056
2	chimera	2.26325
2	chimera	2.05864
2	chimera	2.83841
2	chimera	2.41803
2	chimera	1.89562
2	chimera	1.62278
2	chimera	2.73301
2	chimera	1.78869
2	chimera	3.62326
2	chimera	2.56088
2	chimera	3.3759
2	chimera	4.04705
2	chimera	3.64229
2	chimera	2.13534
2	chimera	2.08433
2	chimera	3.58065
2	chimera	4.18121
2	chimera	5.602
2	chimera	2.21958
2	chimera	3.40726
2	chimera	5.26706
2	chimera	2.55022
2	chimera	2.59924
2	chimera	3.05719
2	chimera	2.60278
2	chimera	1.82672
2	chimera	1.92445
2	chimera	5.66601
2	chimera	3.4926
2	chimera	2.65634
2	chimera	2.86927
2	chimera	4.59288
2	chimera	1.47365
2	chimera	2.30747
2	chimera	5.50421
2	chimera	3.05297
2	chimera	2.43191
2	chimera	3.6278
2	chimera	3.31553
2	chimera	4.4144
2	chimera	1.84921
2	chimera	2.06434
2	chimera	2.13929
2	chimera	3.86859
2	chimera	4.45665
2	chimera	2.074
2	chimera	3.06383
2	chimera	1.39032
2	chimera	3.60469
2	chimera	4.18038
2	chimera	1.94093
2	chimera	2.92119
2	chimera	2.5891
2	chimera	2.66082
2	chimera	2.47767
2	chimera	3.40207
2	chimera	1.30714
2	chimera	4.34514
2	chimera	1.66644
2	chimera	1.86802
2	chimera	3.60631
2	chimera	1.31924
2	chimera	2.32127
2	chimera	2.83091
2	chimera	1.86855
2	chimera	1.63047
2	chimera	5.22259
2	chimera	5.91469
2	chimera	2.71328
2	chimera	8.14092
2	chimera	2.12654
2	chimera	4.24814
2	chimera	1.97559
2	chimera	1.90562
2	chimera	1.942
2	chimera	2.75481
2	chimera	3.49144
2	chimera	2.73332
2	chimera	2.31863
2	chimera	2.97634
2	chimera	2.35605
2	chimera	2.01464
1	chimera	1.03446
1	chimera	2.65633
1	chimera	4.536
1	chimera	1.23322
1	chimera	0.897664
1	chimera	2.54932
1	chimera	4.12491
1	chimera	3.98363
1	chimera	2.82981
1	chimera	2.91371
1	chimera	4.10667
1	chimera	4.04421
1	chimera	3.68796
1	chimera	4.61951
1	chimera	2.33958
1	chimera	3.18118
1	chimera	3.91542
1	chimera	2.25338
1	chimera	2.76755
1	chimera	4.43109
1	chimera	2.22082
1	chimera	6.23371
1	chimera	5.06478
1	chimera	4.3667
1	chimera	5.1011
1	chimera	3.15397
1	chimera	1.34354
1	chimera	5.34892
1	chimera	3.57302
1	chimera	1.32082
1	chimera	3.3088
1	chimera	4.43971
1	chimera	1.96561
1	chimera	5.32251
1	chimera	2.141
1	chimera	2.81472
1	chimera	2.74562
1	chimera	5.10264
1	chimera	3.63095
1	chimera	2.50597
1	chimera	3.86253
1	chimera	4.16471
1	chimera	3.31633
1	chimera	2.53392
1	chimera	4.81888
1	chimera	2.53709
1	chimera	2.59046
1	chimera	4.77455
1	chimera	2.98229
1	chimera	3.4332
1	chimera	3.89085
1	chimera	3.31527
1	chimera	4.53295
1	chimera	4.47287
1	chimera	5.46595
1	chimera	2.67576
1	chimera	3.63583
1	chimera	2.52924
1	chimera	4.06483
1	chimera	2.63747
1	chimera	3.2679
1	chimera	1.97961
1	chimera	6.18607
1	chimera	4.61019
1	chimera	5.13985
1	chimera	4.215
1	chimera	2.77982
1	chimera	2.75308
1	chimera	2.10095
1	chimera	2.81848
1	chimera	2.82573
1	chimera	3.09149
1	chimera	2.95091
1	chimera	2.99706
1	chimera	4.52562
1	chimera	1.95731
1	chimera	3.20256
1	chimera	2.80282
4	swap	2.45134
4	swap	1.6615
4	swap	2.01859
4	swap	1.85617
4	swap	2.11421
4	swap	0.929549
4	swap	1.35175
4	swap	2.47292
4	swap	2.50143
4	swap	1.81752
4	swap	4.12764
4	swap	1.73981
4	swap	1.59246
4	swap	2.55196
4	swap	2.14336
4	swap	1.86596
4	swap	1.10943
4	swap	0.815758
4	swap	2.52945
4	swap	1.45018
4	swap	1.53637
4	swap	0.828039
4	swap	0.665601
4	swap	1.19206
4	swap	1.51273
4	swap	1.48656
4	swap	1.53554
4	swap	1.83174
4	swap	1.48461
4	swap	2.08236
4	swap	4.514
4	swap	2.07824
4	swap	4.29427
4	swap	3.70108
4	swap	3.71868
4	swap	3.44169
4	swap	1.97208
4	swap	1.0691
4	swap	1.90807
4	swap	2.43545
4	swap	2.34369
4	swap	2.6657
4	swap	5.73603
4	swap	1.86106
4	swap	4.75555
4	swap	2.1122
4	swap	4.12252
4	swap	1.65795
4	swap	2.03712
4	swap	2.49351
4	swap	2.97305
4	swap	1.59471
4	swap	3.63214
4	swap	3.27728
4	swap	3.03896
4	swap	1.29381
4	swap	1.65522
4	swap	0.98379
4	swap	1.61383
4	swap	2.17969
4	swap	2.08154
4	swap	2.44378
4	swap	2.51642
4	swap	1.98634
4	swap	2.29195
4	swap	3.0926
4	swap	2.8293
4	swap	3.48128
4	swap	3.05726
4	swap	1.20403
4	swap	3.03544
4	swap	2.25539
4	swap	2.72972
4	swap	2.19551
4	swap	1.88361
4	swap	3.26919
3	swap	3.23444
3	swap	2.02633
3	swap	2.59083
3	swap	3.11519
3	swap	2.33719
3	swap	1.36727
3	swap	1.29387
3	swap	1.13517
3	swap	2.57185
3	swap	1.84269
3	swap	1.17989
3	swap	2.21981
3	swap	1.62267
3	swap	1.9219
3	swap	2.14661
3	swap	1.46923
3	swap	1.64223
3	swap	1.70909
3	swap	2.50875
3	swap	1.3252
3	swap	3.90835
3	swap	2.56123
3	swap	1.28888
3	swap	1.56419
3	swap	1.40818
3	swap	3.05953
3	swap	3.55732
3	swap	1.4956
3	swap	4.04375
3	swap	2.18222
3	swap	2.05396
3	swap	0.896553
3	swap	1.84454
3	swap	2.04565
3	swap	2.10442
3	swap	2.03325
3	swap	1.14496
3	swap	1.89239
3	swap	1.04081
3	swap	1.17844
3	swap	1.87345
3	swap	2.67472
3	swap	3.17689
3	swap	2.63719
3	swap	1.98564
3	swap	2.45791
3	swap	2.97439
3	swap	2.32931
3	swap	1.88521
3	swap	2.25498
3	swap	1.32858
3	swap	3.93815
3	swap	0.75673
3	swap	2.50496
3	swap	2.69627
3	swap	2.0914
3	swap	1.50768
3	swap	3.43255
3	swap	3.49888
3	swap	1.13817
3	swap	2.12643
3	swap	2.46266
3	swap	3.03734
3	swap	4.79181
3	swap	1.59731
3	swap	3.69214
3	swap	2.9798
3	swap	2.30717
3	swap	1.67984
3	swap	1.39641
3	swap	5.67645
3	swap	3.23961
3	swap	2.98376
3	swap	1.96753
3	swap	1.60614
3	swap	2.1645
3	swap	2.21768
3	swap	1.51057
3	swap	1.93994
3	swap	1.16705
2	swap	1.52813
2	swap	1.88527
2	swap	1.78258
2	swap	3.93575
2	swap	3.00672
2	swap	4.10156
2	swap	2.28706
2	swap	1.62929
2	swap	3.0298
2	swap	2.83285
2	swap	2.09532
2	swap	2.44954
2	swap	2.80256
2	swap	7.32173
2	swap	5.12896
2	swap	7.00008
2	swap	3.5577
2	swap	6.58174
2	swap	4.58277
2	swap	4.34097
2	swap	1.55739
2	swap	1.77126
2	swap	2.94474
2	swap	4.14704
2	swap	3.40297
2	swap	3.64286
2	swap	3.15527
2	swap	1.83726
2	swap	2.72129
2	swap	2.20865
2	swap	3.5991
2	swap	3.29512
2	swap	1.59189
2	swap	1.66172
2	swap	2.09354
2	swap	4.25084
2	swap	3.88473
2	swap	2.88649
2	swap	1.79965
2	swap	2.35598
2	swap	1.66219
2	swap	2.15601
2	swap	2.40376
2	swap	1.77524
2	swap	2.66092
2	swap	3.06181
2	swap	3.10747
2	swap	1.04529
2	swap	2.75907
2	swap	1.16508
2	swap	2.68872
2	swap	1.65655
2	swap	1.8508
2	swap	2.29352
2	swap	2.68819
2	swap	1.40558
2	swap	2.4941
2	swap	1.43782
2	swap	1.82671
2	swap	1.99267
2	swap	1.86438
2	swap	2.82161
2	swap	2.37409
2	swap	1.62997
2	swap	1.84781
2	swap	2.65524
2	swap	1.75219
2	swap	3.29688
2	swap	1.91746
2	swap	2.3978
2	swap	2.21905
2	swap	2.35267
2	swap	1.81566
2	swap	2.8616
2	swap	2.6047
2	swap	2.29936
2	swap	1.85154
2	swap	3.93473
2	swap	2.00052
2	swap	2.30659
2	swap	1.79117
2	swap	1.38724
2	swap	2.73791
2	swap	4.28043
2	swap	1.92474
2	swap	1.85869
2	swap	2.16266
2	swap	5.51755
2	swap	2.02093
2	swap	3.62428
2	swap	2.32157
2	swap	2.90743
2	swap	1.82778
2	swap	1.99467
2	swap	2.02564
2	swap	1.64882
1	swap	4.09391
1	swap	4.16935
1	swap	2.95578
1	swap	2.64631
1	swap	3.18884
1	swap	2.95926
1	swap	2.10125
1	swap	3.11797
1	swap	1.852
1	swap	2.14716
1	swap	3.03264
1	swap	1.92331
1	swap	1.33364
1	swap	4.60779
1	swap	4.29223
1	swap	4.13003
1	swap	4.29852
1	swap	3.75846
1	swap	3.07274
1	swap	2.20857
1	swap	2.48648
1	swap	2.21653
1	swap	1.9112
1	swap	5.04571
1	swap	2.50424
1	swap	1.88233
1	swap	4.54045
1	swap	2.45508
1	swap	1.80197
1	swap	4.42048
1	swap	2.01825
1	swap	2.31245
1	swap	2.69578
1	swap	3.16888
1	swap	1.98237
1	swap	4.69292
1	swap	5.82242
1	swap	4.79459
1	swap	3.95772
1	swap	3.25503
1	swap	3.62929
1	swap	3.18749
1	swap	3.78294
1	swap	2.86301
1	swap	2.64068
1	swap	4.83386
1	swap	1.48424
1	swap	1.78045
1	swap	3.09626
1	swap	2.49004
1	swap	3.32889
1	swap	3.9334
1	swap	3.11662
1	swap	1.46543
1	swap	1.822
1	swap	1.55218
1	swap	1.70849
1	swap	4.58092
1	swap	2.98285
1	swap	4.6808
1	swap	3.03613
1	swap	3.3068
1	swap	3.20318
1	swap	1.03316
1	swap	2.18643
1	swap	1.00499
1	swap	3.3494
1	swap	2.18254
1	swap	2.12075
1	swap	1.53141
1	swap	2.36017
1	swap	2.69814
1	swap	2.41127
1	swap	4.70899
1	swap	2.68462
1	swap	2.1704
1	swap	2.13206
1	swap	2.50176
1	swap	2.31765
1	swap	4.43384
1	swap	1.98266
1	swap	2.14905
1	swap	2.4611
1	swap	4.18883
1	swap	1.62657
1	swap	1.9724
1	swap	2.61602
