# Supplementary material for: The relative binding position of Nck and Grb2 adaptors impacts actin-based motility of Vaccinia virus
Source: eLife journal article supplement (doi:10.7554/elife.74655), 2022-07-07
Supplement: supp [file Fig4D_source data.xlsx]

## Sheet: Sheet1
replicate	condition	virus speed
1	hybrid N-G	0.162
1	hybrid N-G	0.142
1	hybrid N-G	0.179
1	hybrid N-G	0.167
1	hybrid N-G	0.15
1	hybrid N-G	0.091
1	hybrid N-G	0.202
1	hybrid N-G	0.156
1	hybrid N-G	0.175
1	hybrid N-G	0.127
1	hybrid N-G	0.177
1	hybrid N-G	0.188
1	hybrid N-G	0.18
1	hybrid N-G	0.173
1	hybrid N-G	0.152
1	hybrid N-G	0.133
1	hybrid N-G	0.132
1	hybrid N-G	0.137
1	hybrid N-G	0.114
1	hybrid N-G	0.185
1	hybrid N-G	0.132
1	hybrid N-G	0.133
1	hybrid N-G	0.146
2	hybrid N-G	0.246
2	hybrid N-G	0.276
2	hybrid N-G	0.2
2	hybrid N-G	0.221
2	hybrid N-G	0.242
2	hybrid N-G	0.261
2	hybrid N-G	0.173
2	hybrid N-G	0.205
2	hybrid N-G	0.236
2	hybrid N-G	0.191
2	hybrid N-G	0.101
2	hybrid N-G	0.137
2	hybrid N-G	0.189
2	hybrid N-G	0.102
2	hybrid N-G	0.139
2	hybrid N-G	0.169
2	hybrid N-G	0.141
2	hybrid N-G	0.178
2	hybrid N-G	0.189
2	hybrid N-G	0.128
2	hybrid N-G	0.09
2	hybrid N-G	0.136
2	hybrid N-G	0.138
2	hybrid N-G	0.165
2	hybrid N-G	0.111
2	hybrid N-G	0.108
3	hybrid N-G	0.24
3	hybrid N-G	0.191
3	hybrid N-G	0.14
3	hybrid N-G	0.219
3	hybrid N-G	0.215
3	hybrid N-G	0.219
3	hybrid N-G	0.233
3	hybrid N-G	0.156
3	hybrid N-G	0.166
3	hybrid N-G	0.128
3	hybrid N-G	0.15
3	hybrid N-G	0.172
3	hybrid N-G	0.169
3	hybrid N-G	0.183
3	hybrid N-G	0.151
3	hybrid N-G	0.142
3	hybrid N-G	0.151
3	hybrid N-G	0.147
3	hybrid N-G	0.238
3	hybrid N-G	0.217
3	hybrid N-G	0.245
3	hybrid N-G	0.223
3	hybrid N-G	0.188
3	hybrid N-G	0.242
3	hybrid N-G	0.162
3	hybrid N-G	0.227
3	hybrid N-G	0.129
3	hybrid N-G	0.184
1	hybrid G-N	0.128
1	hybrid G-N	0.058
1	hybrid G-N	0.052
1	hybrid G-N	0.125
1	hybrid G-N	0.099
1	hybrid G-N	0.094
1	hybrid G-N	0.085
1	hybrid G-N	0.069
1	hybrid G-N	0.076
1	hybrid G-N	0.071
1	hybrid G-N	0.086
1	hybrid G-N	0.041
1	hybrid G-N	0.112
1	hybrid G-N	0.112
1	hybrid G-N	0.062
1	hybrid G-N	0.139
1	hybrid G-N	0.099
1	hybrid G-N	0.142
1	hybrid G-N	0.171
1	hybrid G-N	0.186
1	hybrid G-N	0.139
1	hybrid G-N	0.159
1	hybrid G-N	0.212
1	hybrid G-N	0.043
1	hybrid G-N	0.067
2	hybrid G-N	0.083
2	hybrid G-N	0.149
2	hybrid G-N	0.159
2	hybrid G-N	0.129
2	hybrid G-N	0.215
2	hybrid G-N	0.1
2	hybrid G-N	0.121
2	hybrid G-N	0.105
2	hybrid G-N	0.104
2	hybrid G-N	0.11
2	hybrid G-N	0.124
2	hybrid G-N	0.162
2	hybrid G-N	0.082
2	hybrid G-N	0.14
2	hybrid G-N	0.076
2	hybrid G-N	0.151
2	hybrid G-N	0.055
2	hybrid G-N	0.125
2	hybrid G-N	0.143
2	hybrid G-N	0.115
2	hybrid G-N	0.102
2	hybrid G-N	0.08
2	hybrid G-N	0.159
2	hybrid G-N	0.153
2	hybrid G-N	0.047
2	hybrid G-N	0.045
3	hybrid G-N	0.097
3	hybrid G-N	0.052
3	hybrid G-N	0.161
3	hybrid G-N	0.171
3	hybrid G-N	0.114
3	hybrid G-N	0.188
3	hybrid G-N	0.232
3	hybrid G-N	0.171
3	hybrid G-N	0.153
3	hybrid G-N	0.171
3	hybrid G-N	0.097
3	hybrid G-N	0.097
3	hybrid G-N	0.093
3	hybrid G-N	0.145
3	hybrid G-N	0.203
3	hybrid G-N	0.153
3	hybrid G-N	0.166
3	hybrid G-N	0.15
3	hybrid G-N	0.076
3	hybrid G-N	0.097
3	hybrid G-N	0.193
3	hybrid G-N	0.125
3	hybrid G-N	0.081
3	hybrid G-N	0.194
3	hybrid G-N	0.164
