# Supplementary material for: The relative binding position of Nck and Grb2 adaptors impacts actin-based motility of Vaccinia virus
Source: eLife journal article supplement (doi:10.7554/elife.74655), 2022-07-07
Supplement: supp [file Fig4E_source data.xlsx]

## Sheet: Sheet1
replicate	condition	plaque size
1	hybrid N-G	1.4205
1	hybrid N-G	1.23751
1	hybrid N-G	1.4547
1	hybrid N-G	1.20536
1	hybrid N-G	1.40161
1	hybrid N-G	1.06295
1	hybrid N-G	1.5379
1	hybrid N-G	1.33296
1	hybrid N-G	1.01165
1	hybrid N-G	1.44423
1	hybrid N-G	1.55091
1	hybrid N-G	1.4376
1	hybrid N-G	1.26635
1	hybrid N-G	1.0507
1	hybrid N-G	1.5749
1	hybrid N-G	1.18188
1	hybrid N-G	1.5282
1	hybrid N-G	1.16733
1	hybrid N-G	1.0091
1	hybrid N-G	1.34955
1	hybrid N-G	1.36333
1	hybrid N-G	1.14181
1	hybrid N-G	1.40161
1	hybrid N-G	1.39523
2	hybrid N-G	1.52462
2	hybrid N-G	0.608931
2	hybrid N-G	1.27962
2	hybrid N-G	1.49834
2	hybrid N-G	1.53356
2	hybrid N-G	0.939683
2	hybrid N-G	0.913141
2	hybrid N-G	1.3618
2	hybrid N-G	1.5527
2	hybrid N-G	1.45266
2	hybrid N-G	0.894511
2	hybrid N-G	1.15023
2	hybrid N-G	1.35185
2	hybrid N-G	1.33858
2	hybrid N-G	1.10914
2	hybrid N-G	1.6974
2	hybrid N-G	1.42637
2	hybrid N-G	1.12905
2	hybrid N-G	1.41871
2	hybrid N-G	1.57337
2	hybrid N-G	1.43454
2	hybrid N-G	1.32939
2	hybrid N-G	1.55244
2	hybrid N-G	1.54428
3	hybrid N-G	1.61956
3	hybrid N-G	1.98273
3	hybrid N-G	1.72369
3	hybrid N-G	1.65657
3	hybrid N-G	1.02875
3	hybrid N-G	1.38554
3	hybrid N-G	1.34496
3	hybrid N-G	0.726838
3	hybrid N-G	1.40825
3	hybrid N-G	0.933813
3	hybrid N-G	1.59889
3	hybrid N-G	1.77014
3	hybrid N-G	1.23343
3	hybrid N-G	1.05657
3	hybrid N-G	0.970053
3	hybrid N-G	1.7168
3	hybrid N-G	1.7538
3	hybrid N-G	1.4746
3	hybrid N-G	1.44857
3	hybrid N-G	0.933813
3	hybrid N-G	2.02611
3	hybrid N-G	1.8171
3	hybrid N-G	1.63411
3	hybrid N-G	1.14921
1	hybrid G-N	0.766906
1	hybrid G-N	0.92335
1	hybrid G-N	0.975668
1	hybrid G-N	1.00323
1	hybrid G-N	0.874349
1	hybrid G-N	0.88124
1	hybrid G-N	0.54666
1	hybrid G-N	0.829433
1	hybrid G-N	1.10149
1	hybrid G-N	1.1635
1	hybrid G-N	1.01471
1	hybrid G-N	0.351935
1	hybrid G-N	0.447128
1	hybrid G-N	0.875115
1	hybrid G-N	0.83811
1	hybrid G-N	1.03488
1	hybrid G-N	0.849084
1	hybrid G-N	1.02671
1	hybrid G-N	0.780177
1	hybrid G-N	0.786812
1	hybrid G-N	0.733218
1	hybrid G-N	0.849084
1	hybrid G-N	0.918246
1	hybrid G-N	0.494597
2	hybrid G-N	1.02441
2	hybrid G-N	0.806974
2	hybrid G-N	0.554571
2	hybrid G-N	0.55304
2	hybrid G-N	0.851636
2	hybrid G-N	0.851636
2	hybrid G-N	1.08439
2	hybrid G-N	0.649254
2	hybrid G-N	0.791151
2	hybrid G-N	0.876902
2	hybrid G-N	0.638025
2	hybrid G-N	0.872818
2	hybrid G-N	0.885068
2	hybrid G-N	0.665843
2	hybrid G-N	0.628072
2	hybrid G-N	0.885068
2	hybrid G-N	0.72301
2	hybrid G-N	0.578561
2	hybrid G-N	0.992001
2	hybrid G-N	0.951168
2	hybrid G-N	0.838875
2	hybrid G-N	0.731687
2	hybrid G-N	0.647978
2	hybrid G-N	0.578561
3	hybrid G-N	1.10914
3	hybrid G-N	0.936621
3	hybrid G-N	0.760781
3	hybrid G-N	0.817182
3	hybrid G-N	1.00374
3	hybrid G-N	0.909313
3	hybrid G-N	0.933813
3	hybrid G-N	0.481326
3	hybrid G-N	1.19566
3	hybrid G-N	1.09204
3	hybrid G-N	1.0729
3	hybrid G-N	1.07597
3	hybrid G-N	1.13441
3	hybrid G-N	0.934324
3	hybrid G-N	0.618119
3	hybrid G-N	1.04304
3	hybrid G-N	1.33143
3	hybrid G-N	1.18188
3	hybrid G-N	1.24007
3	hybrid G-N	1.28243
3	hybrid G-N	0.806974
3	hybrid G-N	0.97184
3	hybrid G-N	0.882771
3	hybrid G-N	1.04075
