# Supplementary material for: The relative binding position of Nck and Grb2 adaptors impacts actin-based motility of Vaccinia virus
Source: eLife journal article supplement (doi:10.7554/elife.74655), 2022-07-07
Supplement: supp [file Fig5-suppl1A_source data.xlsx]

## Sheet: Sheet1
replicate	condition	RFP intensity			replicate	condition	RFP intensity
1	N-G	2446.88			1	GFP Nck	2446.88
1	N-G	2277.48			1	GFP Nck	2277.48
1	N-G	2893.96			1	GFP Nck	2893.96
1	N-G	2676.04			1	GFP Nck	2676.04
1	N-G	2188.52			1	GFP Nck	2188.52
1	N-G	1945.6			1	GFP Nck	1945.6
1	N-G	2262.4			1	GFP Nck	2262.4
1	N-G	2092.44			1	GFP Nck	2092.44
1	N-G	2139.84			1	GFP Nck	2139.84
1	N-G	2353.52			1	GFP Nck	2353.52
1	N-G	2072.8			1	GFP Nck	2072.8
1	N-G	2154.36			1	GFP Nck	2154.36
1	N-G	2028.8			1	GFP Nck	2028.8
1	N-G	2047.12			1	GFP Nck	2047.12
1	N-G	2115.44			1	GFP Nck	2115.44
1	N-G	2175.92			1	GFP Nck	2175.92
1	N-G	2418.72			1	GFP Nck	2418.72
1	N-G	2228.92			1	GFP Nck	2228.92
1	N-G	2047.12			1	GFP Nck	2047.12
1	N-G	2115.04			1	GFP Nck	2115.04
1	N-G	1986.88			1	GFP Nck	1986.88
1	N-G	2418.72			1	GFP Nck	2418.72
1	N-G	2175.92			1	GFP Nck	2175.92
1	N-G	2094.84			1	GFP Nck	2094.84
1	N-G	2401.24			1	GFP Nck	2401.24
1	N-G	2622.36			1	GFP Nck	2622.36
1	N-G	2790.92			1	GFP Nck	2790.92
1	N-G	2106.24			1	GFP Nck	2106.24
1	N-G	2018.6			1	GFP Nck	2018.6
1	N-G	2038.2			1	GFP Nck	2038.2
1	N-G	1785.8			1	GFP Nck	1785.8
1	N-G	1735			1	GFP Nck	1735
1	N-G	1950.28			1	GFP Nck	1950.28
1	N-G	1718.64			1	GFP Nck	1718.64
1	N-G	1811.32			1	GFP Nck	1811.32
1	N-G	1825.88			1	GFP Nck	1825.88
1	G-N	2250			2	GFP Nck	1769.32
1	G-N	2063.56			2	GFP Nck	1865.92
1	G-N	2387.44			2	GFP Nck	1890.28
1	G-N	2431.72			2	GFP Nck	1876.12
1	G-N	2119.36			2	GFP Nck	1705.92
1	G-N	2025.08			2	GFP Nck	1812.4
1	G-N	2394.88			2	GFP Nck	1716.44
1	G-N	2509.08			2	GFP Nck	1831.88
1	G-N	2392.92			2	GFP Nck	1601.64
1	G-N	1823.56			2	GFP Nck	1715.36
1	G-N	1990.84			2	GFP Nck	1761.4
1	G-N	2080.12			2	GFP Nck	2116.2
1	G-N	1610.84			2	GFP Nck	1852.68
1	G-N	2173.92			2	GFP Nck	2220.96
1	G-N	1921.36			2	GFP Nck	2376.24
1	G-N	1869.6			2	GFP Nck	2807
1	G-N	2040.16			2	GFP Nck	2301.24
1	G-N	1677.52			2	GFP Nck	2287.64
1	G-N	2662.92			2	GFP Nck	2433.36
1	G-N	2125.88			2	GFP Nck	2807
1	G-N	2440.64			2	GFP Nck	1966.48
1	G-N	2136.48			2	GFP Nck	2188.92
1	G-N	2662.92			2	GFP Nck	1791.76
1	G-N	2084.2			2	GFP Nck	2179.04
1	G-N	3527.52			2	GFP Nck	2050.8
1	G-N	2555.12			2	GFP Nck	1857.72
1	G-N	2272.28			2	GFP Nck	1891.72
1	G-N	2291.32			2	GFP Nck	2365.92
1	G-N	2684.64			2	GFP Nck	2328.72
1	G-N	2568.96			2	GFP Nck	2749.56
1	G-N	2056.6			2	GFP Nck	2351.8
1	G-N	2034.68			2	GFP Nck	2690.04
1	G-N	2546.84			2	GFP Nck	2590.56
1	G-N	1810.76			2	GFP Nck	2441.12
1	G-N	2073.76			3	GFP Nck	2301.2
1	G-N	1997.56			3	GFP Nck	2209.52
2	N-G	1769.32			3	GFP Nck	2114.04
2	N-G	1865.92			3	GFP Nck	2350.48
2	N-G	1890.28			3	GFP Nck	2051.48
2	N-G	1876.12			3	GFP Nck	1985.52
2	N-G	1705.92			3	GFP Nck	2187.04
2	N-G	1812.4			3	GFP Nck	1703.36
2	N-G	1716.44			3	GFP Nck	1789.24
2	N-G	1831.88			3	GFP Nck	1746.8
2	N-G	1601.64			3	GFP Nck	1805.24
2	N-G	1715.36			3	GFP Nck	1665.76
2	N-G	1761.4			3	GFP Nck	1646.12
2	N-G	2116.2			3	GFP Nck	1425.36
2	N-G	1852.68			3	GFP Nck	2030.56
2	N-G	2220.96			3	GFP Nck	2134.8
2	N-G	2376.24			3	GFP Nck	2201.48
2	N-G	2807			3	GFP Nck	2008.44
2	N-G	2301.24			3	GFP Nck	1948.76
2	N-G	2287.64			3	GFP Nck	2198.92
2	N-G	2433.36			3	GFP Nck	2020.12
2	N-G	2807			3	GFP Nck	1826.64
2	N-G	1966.48			3	GFP Nck	1658.92
2	N-G	2188.92			3	GFP Nck	1617.12
2	N-G	1791.76			3	GFP Nck	1606.36
2	N-G	2179.04			3	GFP Nck	1994
2	N-G	2050.8			3	GFP Nck	1745.92
2	N-G	1857.72			3	GFP Nck	1747.92
2	N-G	1891.72			3	GFP Nck	2389.76
2	N-G	2365.92			3	GFP Nck	3104.24
2	N-G	2328.72			3	GFP Nck	2494.24
2	N-G	2749.56			3	GFP Nck	2434.32
2	N-G	2351.8			3	GFP Nck	2340.68
2	N-G	2690.04			3	GFP Nck	2253.2
2	N-G	2590.56			3	GFP Nck	3104.24
2	N-G	2441.12			1	GFP Grb2	2147.28
2	G-N	2375.2			1	GFP Grb2	2147.2
2	G-N	1893.36			1	GFP Grb2	1768.28
2	G-N	1956.08			1	GFP Grb2	2346.12
2	G-N	1927.12			1	GFP Grb2	2062.68
2	G-N	2044.44			1	GFP Grb2	1975.84
2	G-N	1916.52			1	GFP Grb2	2159.28
2	G-N	2100.64			1	GFP Grb2	2153.44
2	G-N	1620.56			1	GFP Grb2	2242.92
2	G-N	1986.12			1	GFP Grb2	2353.96
2	G-N	2071.4			1	GFP Grb2	2532.4
2	G-N	2008.56			1	GFP Grb2	2054.04
2	G-N	1880.64			1	GFP Grb2	2401.96
2	G-N	2009.04			1	GFP Grb2	2285.84
2	G-N	1871.32			1	GFP Grb2	1801
2	G-N	2039.32			1	GFP Grb2	1824.36
2	G-N	2092.72			1	GFP Grb2	1759.72
2	G-N	1876.12			1	GFP Grb2	1712.8
2	G-N	2049.36			1	GFP Grb2	1830.24
2	G-N	1910.84			1	GFP Grb2	1600.04
2	G-N	2059.8			1	GFP Grb2	1441
2	G-N	2370.64			1	GFP Grb2	2256.52
2	G-N	2092.16			1	GFP Grb2	1422
2	G-N	2320.32			1	GFP Grb2	2343.8
2	G-N	2904.32			1	GFP Grb2	1630.08
2	G-N	1798.2			1	GFP Grb2	1617.72
2	G-N	2216.2			1	GFP Grb2	2059.48
2	G-N	2461.36			1	GFP Grb2	2435.72
2	G-N	2079.92			1	GFP Grb2	1933.2
2	G-N	2691.8			1	GFP Grb2	1695.16
2	G-N	2651.4			2	GFP Grb2	3219.88
2	G-N	2461.68			2	GFP Grb2	2275.08
2	G-N	2367.56			2	GFP Grb2	2538.56
2	G-N	2436.32			2	GFP Grb2	2766.92
2	G-N	2941.28			2	GFP Grb2	1970.68
2	G-N	2616.12			2	GFP Grb2	2279.2
3	N-G	2301.2			2	GFP Grb2	2556.68
3	N-G	2209.52			2	GFP Grb2	2691.76
3	N-G	2114.04			2	GFP Grb2	3026.44
3	N-G	2350.48			2	GFP Grb2	1833.56
3	N-G	2051.48			2	GFP Grb2	3370
3	N-G	1985.52			2	GFP Grb2	2216.28
3	N-G	2187.04			2	GFP Grb2	2598.36
3	N-G	1703.36			2	GFP Grb2	3117.88
3	N-G	1789.24			2	GFP Grb2	2309.44
3	N-G	1746.8			2	GFP Grb2	2433.88
3	N-G	1805.24			2	GFP Grb2	2452.88
3	N-G	1665.76			2	GFP Grb2	2319.24
3	N-G	1646.12			2	GFP Grb2	2283.96
3	N-G	1425.36			2	GFP Grb2	2383.12
3	N-G	2030.56			2	GFP Grb2	2066.96
3	N-G	2134.8			2	GFP Grb2	2249.36
3	N-G	2201.48			2	GFP Grb2	2062.24
3	N-G	2008.44			2	GFP Grb2	3229.52
3	N-G	1948.76			2	GFP Grb2	2410.84
3	N-G	2198.92			2	GFP Grb2	2777.84
3	N-G	2020.12			2	GFP Grb2	2410.84
3	N-G	1826.64			2	GFP Grb2	1993.84
3	N-G	1658.92			2	GFP Grb2	2359.68
3	N-G	1617.12			3	GFP Grb2	1552.28
3	N-G	1606.36			3	GFP Grb2	1757.08
3	N-G	1994			3	GFP Grb2	1929.64
3	N-G	1745.92			3	GFP Grb2	2133.04
3	N-G	1747.92			3	GFP Grb2	1820.12
3	N-G	2389.76			3	GFP Grb2	1832.96
3	N-G	3104.24			3	GFP Grb2	1924.88
3	N-G	2494.24			3	GFP Grb2	1657.88
3	N-G	2434.32			3	GFP Grb2	2557.48
3	N-G	2340.68			3	GFP Grb2	2708.76
3	N-G	2253.2			3	GFP Grb2	2360.56
3	N-G	3104.24			3	GFP Grb2	2480.32
3	G-N	2022.72			3	GFP Grb2	2553.76
3	G-N	2281.44			3	GFP Grb2	2373.68
3	G-N	2396.08			3	GFP Grb2	2744.52
3	G-N	1546.4			3	GFP Grb2	2533.12
3	G-N	1856.56			3	GFP Grb2	2307.96
3	G-N	1785.52			3	GFP Grb2	2509.36
3	G-N	1861.16			3	GFP Grb2	2954.64
3	G-N	1738.92			3	GFP Grb2	2405.64
3	G-N	2024.68			3	GFP Grb2	2452.76
3	G-N	2145.12			3	GFP Grb2	2597.72
3	G-N	2101.88			3	GFP Grb2	1947.4
3	G-N	2546.48			3	GFP Grb2	2353.32
3	G-N	2426.84			3	GFP Grb2	1967.24
3	G-N	1647.12			3	GFP Grb2	1481.8
3	G-N	1046.72			3	GFP Grb2	2430.2
3	G-N	1059.56			3	GFP Grb2	2305.76
3	G-N	1061.24			3	GFP Grb2	2332.32
3	G-N	1179.96			3	GFP Grb2	1703.36
3	G-N	1060.32			1	GFP NWASP	1620.28
3	G-N	1190.8			1	GFP NWASP	2168.12
3	G-N	1050.36			1	GFP NWASP	2748.32
3	G-N	2238.96			1	GFP NWASP	1620.28
3	G-N	2103.32			1	GFP NWASP	1963.04
3	G-N	1957.32			1	GFP NWASP	2096.16
3	G-N	2382.96			1	GFP NWASP	1932
3	G-N	2382.96			1	GFP NWASP	1666.64
3	G-N	2020.28			1	GFP NWASP	1890.76
3	G-N	1909.36			1	GFP NWASP	1755
3	G-N	1954.28			1	GFP NWASP	1705.84
3	G-N	1908.8			1	GFP NWASP	1578.36
3	G-N	2067.72			1	GFP NWASP	1581.44
3	G-N	2028.96			1	GFP NWASP	2055.16
3	G-N	2246.84			1	GFP NWASP	1517.72
3	G-N	1861.96			1	GFP NWASP	1961.32
3	G-N	1768.04			1	GFP NWASP	1751.56
					1	GFP NWASP	2065.16
					1	GFP NWASP	2474.48
					1	GFP NWASP	1712.4
					1	GFP NWASP	1643.44
					1	GFP NWASP	1640
					1	GFP NWASP	2092.28
					1	GFP NWASP	2092.28
					1	GFP NWASP	1890.72
					1	GFP NWASP	1991.28
					1	GFP NWASP	2341.64
					1	GFP NWASP	2718.76
					1	GFP NWASP	2933.4
					1	GFP NWASP	2690.36
					2	GFP NWASP	2184.2
					2	GFP NWASP	1928.32
					2	GFP NWASP	1974.64
					2	GFP NWASP	1926.32
					2	GFP NWASP	1743.08
					2	GFP NWASP	1537.48
					2	GFP NWASP	1926.88
					2	GFP NWASP	2067
					2	GFP NWASP	2181.12
					2	GFP NWASP	1594.6
					2	GFP NWASP	2062.36
					2	GFP NWASP	2279.16
					2	GFP NWASP	1948.96
					2	GFP NWASP	2061
					2	GFP NWASP	2850.56
					2	GFP NWASP	2133.36
					2	GFP NWASP	2624.4
					2	GFP NWASP	1655.44
					2	GFP NWASP	2459.8
					2	GFP NWASP	2328.12
					2	GFP NWASP	2126.04
					2	GFP NWASP	2404.2
					2	GFP NWASP	2306.12
					2	GFP NWASP	2175.44
					2	GFP NWASP	1705.56
					2	GFP NWASP	1765.32
					2	GFP NWASP	2104.52
					2	GFP NWASP	1506.28
					2	GFP NWASP	1355.12
					2	GFP NWASP	1659.64
					3	GFP NWASP	1466.24
					3	GFP NWASP	1600.96
					3	GFP NWASP	1608.88
					3	GFP NWASP	1542.04
					3	GFP NWASP	1483.64
					3	GFP NWASP	1613.72
					3	GFP NWASP	2608.08
					3	GFP NWASP	2230.44
					3	GFP NWASP	2253.36
					3	GFP NWASP	2381.8
					3	GFP NWASP	2487.28
					3	GFP NWASP	2487.6
					3	GFP NWASP	2171.96
					3	GFP NWASP	2524.4
					3	GFP NWASP	2666.96
					3	GFP NWASP	1977.84
					3	GFP NWASP	2243.84
					3	GFP NWASP	1980.52
					3	GFP NWASP	1944.44
					3	GFP NWASP	1754.28
					3	GFP NWASP	1894.36
					3	GFP NWASP	1936.48
					3	GFP NWASP	1733.68
					3	GFP NWASP	1692.16
					3	GFP NWASP	2173.48
					3	GFP NWASP	2118.72
					3	GFP NWASP	1876.68
					3	GFP NWASP	2094.56
					3	GFP NWASP	1967.16
					3	GFP NWASP	1816.88
