# Supplementary material for: The relative binding position of Nck and Grb2 adaptors impacts actin-based motility of Vaccinia virus
Source: eLife journal article supplement (doi:10.7554/elife.74655), 2022-07-07
Supplement: supp [file Fig5-suppl1B_source data.xlsx]

## Sheet: Sheet1
replicate	condition	tgGFP2:RFP ratio
1	N-G	1.30667
1	N-G	1.06239
1	N-G	1.27603
1	N-G	1.04525
1	N-G	0.9763
1	N-G	0.639669
1	N-G	1.0026
1	N-G	0.949528
1	N-G	0.682205
1	N-G	0.816925
1	N-G	0.734971
1	N-G	0.852259
1	N-G	0.84716
1	N-G	1.13695
1	N-G	0.83624
1	N-G	0.849027
1	N-G	0.910332
1	N-G	1.12557
1	N-G	1.05413
1	N-G	0.999426
1	N-G	0.968248
1	N-G	1.41865
1	N-G	0.930608
1	N-G	0.984466
1	N-G	0.901982
1	N-G	0.746217
1	N-G	0.793599
1	N-G	0.744101
1	N-G	1.06795
1	N-G	1.02229
1	N-G	1.12561
1	N-G	0.954535
1	N-G	1.02229
1	N-G	0.954535
1	N-G	0.992297
2	N-G	1.03559
2	N-G	1.13199
2	N-G	1.05331
2	N-G	1.34344
2	N-G	1.16529
2	N-G	1.17361
2	N-G	0.706742
2	N-G	0.920757
2	N-G	1.15856
2	N-G	1.02606
2	N-G	0.791321
2	N-G	1.22824
2	N-G	1.02304
2	N-G	0.702987
2	N-G	0.683707
2	N-G	0.652602
2	N-G	0.682232
2	N-G	1.32533
2	N-G	1.19593
2	N-G	1.01805
2	N-G	1.44137
2	N-G	1.0982
2	N-G	1.2435
2	N-G	1.05364
2	N-G	1.24843
2	N-G	1.01805
2	N-G	1.39387
3	N-G	1.04517
3	N-G	1.09223
3	N-G	0.982188
3	N-G	1.17628
3	N-G	1.93394
3	N-G	1.08411
3	N-G	1.44813
3	N-G	1.19384
3	N-G	1.63903
3	N-G	1.05959
3	N-G	0.990923
3	N-G	1.37999
3	N-G	1.10112
3	N-G	1.2994
3	N-G	1.01191
3	N-G	1.41172
3	N-G	1.3855
3	N-G	1.10505
3	N-G	1.00306
3	N-G	1.17057
3	N-G	0.941277
3	N-G	0.830567
3	N-G	1.25259
3	N-G	1.11025
3	N-G	1.23204
3	N-G	1.21511
3	N-G	1.00336
3	N-G	1.03489
3	N-G	1.31898
3	N-G	1.11307
3	N-G	0.838682
3	N-G	0.826726
3	N-G	0.873238
1	G-N	0.768393
1	G-N	0.804997
1	G-N	0.554743
1	G-N	0.651152
1	G-N	1.3347
1	G-N	0.760826
1	G-N	0.955983
1	G-N	0.966091
1	G-N	1.05011
1	G-N	0.856821
1	G-N	0.974758
1	G-N	1.11056
1	G-N	0.913639
1	G-N	1.14018
1	G-N	0.928372
1	G-N	0.814036
1	G-N	1.18248
1	G-N	0.814036
1	G-N	0.640434
1	G-N	1.02743
1	G-N	1.41778
1	G-N	0.791642
1	G-N	0.884782
1	G-N	0.835492
1	G-N	0.96636
1	G-N	0.939014
1	G-N	0.843301
1	G-N	0.976765
1	G-N	1.24145
1	G-N	1.12006
1	G-N	0.99202
1	G-N	0.478392
1	G-N	0.577228
1	G-N	0.525036
1	G-N	1.07747
2	G-N	0.710772
2	G-N	0.612231
2	G-N	0.672135
2	G-N	0.700822
2	G-N	0.755117
2	G-N	0.717648
2	G-N	0.545783
2	G-N	0.700822
2	G-N	0.731815
2	G-N	0.971174
2	G-N	0.782528
2	G-N	1.10834
2	G-N	0.949875
2	G-N	0.898765
2	G-N	1.10798
2	G-N	0.969461
2	G-N	0.719529
2	G-N	0.990221
2	G-N	0.908831
2	G-N	1.08798
2	G-N	1.06978
2	G-N	0.735337
2	G-N	0.77019
2	G-N	1.3413
2	G-N	0.921341
2	G-N	0.929321
2	G-N	0.932681
2	G-N	1.06978
2	G-N	1.02922
2	G-N	1.02264
2	G-N	1.64924
3	G-N	0.823597
3	G-N	2.01728
3	G-N	1.18645
3	G-N	0.904604
3	G-N	0.995992
3	G-N	0.899303
3	G-N	1.03115
3	G-N	0.96456
3	G-N	2.21451
3	G-N	0.823597
3	G-N	2.15693
3	G-N	1.12605
3	G-N	0.495865
3	G-N	0.756363
3	G-N	0.791462
3	G-N	0.788314
3	G-N	1.46664
3	G-N	0.808546
3	G-N	0.788314
3	G-N	0.889003
3	G-N	0.756363
3	G-N	1.83793
3	G-N	1.13697
3	G-N	0.780475
3	G-N	1.0451
3	G-N	0.706581
3	G-N	0.810557
3	G-N	0.806001
3	G-N	0.804368
3	G-N	0.900445
3	G-N	1.23701
3	G-N	1.04522
3	G-N	1.20821
