# Supplementary material for: The relative binding position of Nck and Grb2 adaptors impacts actin-based motility of Vaccinia virus
Source: eLife journal article supplement (doi:10.7554/elife.74655), 2022-07-07
Supplement: supp [file Fig5-suppl1C_source data.xlsx]

## Sheet: Sheet1
replicate	condition	GFP WIP/RFP
1	N-G	0.293515
1	N-G	0.257023
1	N-G	0.249923
1	N-G	0.105959
1	N-G	0.201876
1	N-G	0.156259
1	N-G	0.235044
1	N-G	0.203976
1	N-G	0.19689
1	N-G	0.22755
1	N-G	0.207193
1	N-G	0.352538
1	N-G	0.237719
1	N-G	0.182717
1	N-G	0.152818
1	N-G	0.20595
1	N-G	0.210068
1	N-G	0.30546
1	N-G	0.118116
1	N-G	0.217607
1	N-G	0.213605
1	N-G	0.162716
1	N-G	0.142316
1	N-G	0.374364
1	N-G	0.232637
1	N-G	0.254735
1	N-G	0.235353
1	N-G	0.302288
1	N-G	0.232131
2	N-G	0.0717324
2	N-G	0.0727279
2	N-G	0.112164
2	N-G	0.0952935
2	N-G	0.04193
2	N-G	0.0809081
2	N-G	0.092769
2	N-G	0.0685696
2	N-G	0.0620707
2	N-G	0.0822537
2	N-G	0.0574555
2	N-G	0.056444
2	N-G	0.780418
2	N-G	0.38679
2	N-G	0.50253
2	N-G	0.491536
2	N-G	0.48447
2	N-G	0.369013
2	N-G	1.05393
2	N-G	1.10637
2	N-G	1.07227
2	N-G	1.43178
2	N-G	1.24316
2	N-G	0.884175
2	N-G	0.579697
2	N-G	0.287818
2	N-G	0.500861
2	N-G	0.118822
2	N-G	0.232092
2	N-G	1.0829
3	N-G	0.233618
3	N-G	0.180715
3	N-G	0.203796
3	N-G	0.313984
3	N-G	0.215597
3	N-G	0.219106
3	N-G	0.199918
3	N-G	0.23656
3	N-G	0.383223
3	N-G	0.269385
3	N-G	0.273517
3	N-G	0.259308
3	N-G	0.219052
3	N-G	0.392094
3	N-G	0.350712
3	N-G	0.177323
3	N-G	0.11573
3	N-G	0.181549
3	N-G	0.0811657
3	N-G	0.0666123
3	N-G	0.0821964
3	N-G	0.776275
3	N-G	0.563706
3	N-G	0.484518
3	N-G	0.159217
3	N-G	0.1497
3	N-G	0.120377
3	N-G	0.268684
3	N-G	0.274619
3	N-G	0.368765
1	G-N	0.436687
1	G-N	0.280211
1	G-N	0.165017
1	G-N	0.0299642
1	G-N	0.0219523
1	G-N	0.02785
1	G-N	0.0529181
1	G-N	0.0615117
1	G-N	0.117026
1	G-N	0.126327
1	G-N	0.127441
1	G-N	0.25364
1	G-N	0.111059
1	G-N	0.0928607
1	G-N	0.066282
1	G-N	0.0830271
1	G-N	0.0385393
1	G-N	0.0710508
1	G-N	0.0677451
1	G-N	0.0820312
1	G-N	0.0552833
1	G-N	0.0748501
1	G-N	0.073762
1	G-N	0.0630787
1	G-N	0.082509
1	G-N	0.0793695
1	G-N	0.14475
1	G-N	0.107145
1	G-N	0.0810859
1	G-N	0.076931
2	G-N	0.0470503
2	G-N	0.11608
2	G-N	0.0433216
2	G-N	0.0951688
2	G-N	0.0673399
2	G-N	0.0428536
2	G-N	0.0741607
2	G-N	0.0321632
2	G-N	0.0558841
2	G-N	0.0392039
2	G-N	0.0396113
2	G-N	0.050786
2	G-N	0.169263
2	G-N	0.144996
2	G-N	0.191835
2	G-N	0.194228
2	G-N	0.168487
2	G-N	0.124852
2	G-N	0.136805
2	G-N	0.0973414
2	G-N	0.13572
2	G-N	0.0574028
2	G-N	0.0736983
2	G-N	0.0546692
2	G-N	0.106113
2	G-N	0.0901143
2	G-N	0.074366
2	G-N	0.0690654
2	G-N	0.0510324
2	G-N	0.0569216
2	G-N	0.157247
2	G-N	0.183631
2	G-N	0.120671
2	G-N	0.165111
2	G-N	0.268768
2	G-N	0.143235
3	G-N	0.0523155
3	G-N	0.0787157
3	G-N	0.121356
3	G-N	0.112303
3	G-N	0.0828502
3	G-N	0.198101
3	G-N	0.15405
3	G-N	0.161553
3	G-N	0.1376
3	G-N	0.142988
3	G-N	0.088815
3	G-N	0.0662055
3	G-N	0.435345
3	G-N	0.294174
3	G-N	0.102606
3	G-N	0.0610149
3	G-N	0.12251
3	G-N	0.151349
3	G-N	0.204111
3	G-N	0.237235
3	G-N	0.134469
3	G-N	0.231246
3	G-N	0.136549
3	G-N	0.188414
3	G-N	0.0515527
3	G-N	0.0576566
3	G-N	0.290708
3	G-N	0.25983
3	G-N	0.10894
3	G-N	0.18491
3	G-N	0.478751
3	G-N	0.487413
