# Supplementary material for: The relative binding position of Nck and Grb2 adaptors impacts actin-based motility of Vaccinia virus
Source: eLife journal article supplement (doi:10.7554/elife.74655), 2022-07-07
Supplement: supp [file Fig5A_source data.xlsx]

## Sheet: Sheet1
replicate	condition	GFP Grb2/RFP			replicate	condition	GFP N-WASP/RFP			replicate	condition	GFP Nck/RFPA3
1	N-G	0.100611			1	N-G	0.658158			1	N-G	0.252265
1	N-G	0.0735097			1	N-G	0.270262			1	N-G	0.23191
1	N-G	0.0909584			1	N-G	0.387597			1	N-G	0.259861
1	N-G	0.128774			1	N-G	0.658158			1	N-G	0.209387
1	N-G	0.0855198			1	N-G	0.339555			1	N-G	0.28806
1	N-G	0.0845615			1	N-G	0.242959			1	N-G	0.2455
1	N-G	0.168556			1	N-G	0.330269			1	N-G	0.15182
1	N-G	0.138309			1	N-G	0.39195			1	N-G	0.182167
1	N-G	0.158561			1	N-G	0.270516			1	N-G	0.126242
1	N-G	0.172645			1	N-G	0.308536			1	N-G	0.132882
1	N-G	0.150197			1	N-G	0.474394			1	N-G	0.194287
1	N-G	0.170376			1	N-G	0.370663			1	N-G	0.132882
1	N-G	0.146464			1	N-G	0.370397			1	N-G	0.120492
1	N-G	0.105099			1	N-G	0.355515			1	N-G	0.113834
1	N-G	0.15729			1	N-G	0.344227			1	N-G	0.0763892
1	N-G	0.121511			1	N-G	0.32884			1	N-G	0.110952
1	N-G	0.19269			1	N-G	0.311905			1	N-G	0.0733273
1	N-G	0.122396			1	N-G	0.295841			1	N-G	0.107457
1	N-G	0.17165			1	N-G	0.259513			1	N-G	0.155817
1	N-G	0.162096			1	N-G	0.201098			1	N-G	0.194044
1	N-G	0.140597			1	N-G	0.300565			1	N-G	0.170711
1	N-G	0.186801			1	N-G	0.351415			1	N-G	0.172315
1	N-G	0.202053			1	N-G	0.27329			1	N-G	0.194195
1	N-G	0.102244			1	N-G	0.27329			1	N-G	0.150578
1	N-G	0.0988909			1	N-G	0.208492			1	N-G	0.190682
1	N-G	0.181243			1	N-G	0.205576			1	N-G	0.184269
1	N-G	0.122555			1	N-G	0.429408			1	N-G	0.168256
1	N-G	0.078991			1	N-G	0.329062			1	N-G	0.23786
1	N-G	0.0781916			1	N-G	0.484489			1	N-G	0.218683
1	N-G	0.110102			1	N-G	0.45982			1	N-G	0.168717
2	N-G	0.113433			1	N-G	0.118117			2	N-G	0.0558813
2	N-G	0.070169			1	G-N	0.10116			2	N-G	0.0657671
2	N-G	0.116712			1	G-N	0.0806988			2	N-G	0.0685746
2	N-G	0.22675			1	G-N	0.12678			2	N-G	0.114728
2	N-G	0.225709			1	G-N	0.10116			2	N-G	0.0446526
2	N-G	0.189558			1	G-N	0.0699866			2	N-G	0.0430654
2	N-G	0.16099			1	G-N	0.125592			2	N-G	0.42323
2	N-G	0.292448			1	G-N	0.0889033			2	N-G	0.191639
2	N-G	0.15087			1	G-N	0.0998708			2	N-G	0.399382
2	N-G	0.281834			1	G-N	0.132072			2	N-G	0.430218
2	N-G	0.115573			1	G-N	0.157514			2	N-G	0.328311
2	N-G	0.219629			1	G-N	0.203365			2	N-G	0.131259
2	N-G	0.0990163			1	G-N	0.164712			2	N-G	0.0603405
2	N-G	0.0959498			1	G-N	0.283286			2	N-G	0.0684593
2	N-G	0.0964736			1	G-N	0.192456			2	N-G	0.0879269
2	N-G	0.0830772			1	G-N	0.23388			2	N-G	0.151173
2	N-G	0.105721			1	G-N	0.148952			2	N-G	0.110879
2	N-G	0.153964			1	G-N	0.125022			2	N-G	0.164055
2	N-G	0.28349			1	G-N	0.120252			2	N-G	0.0905075
2	N-G	0.230857			1	G-N	0.165528			2	N-G	0.0953525
2	N-G	0.172834			1	G-N	0.12534			2	N-G	0.054771
2	N-G	0.410392			1	G-N	0.312479			2	N-G	0.100997
2	N-G	0.281209			1	G-N	0.170682			2	N-G	0.0862163
2	N-G	0.111162			1	G-N	0.0919152			2	N-G	0.0998827
2	N-G	0.214946			1	G-N	0.199472			2	N-G	0.0610603
2	N-G	0.201495			1	G-N	0.187486			2	N-G	0.0614759
2	N-G	0.214946			1	G-N	0.174349			2	N-G	0.0396691
2	N-G	0.218172			1	G-N	0.149385			2	N-G	0.0270887
2	N-G	0.13573			1	G-N	0.124621			2	N-G	0.0369505
3	N-G	0.246657			1	G-N	0.192056			2	N-G	0.0308167
3	N-G	0.16919			2	N-G	0.863639			3	N-G	0.248119
3	N-G	0.174685			2	N-G	1.05209			3	N-G	0.200799
3	N-G	0.143251			2	N-G	0.856156			3	N-G	0.265775
3	N-G	0.184339			2	N-G	0.559658			3	N-G	0.195597
3	N-G	0.175563			2	N-G	0.844551			3	N-G	0.190649
3	N-G	0.231162			2	N-G	0.788069			3	N-G	0.191219
3	N-G	0.267185			2	N-G	0.350079			3	N-G	0.164211
3	N-G	0.154637			2	N-G	0.30208			3	N-G	0.113955
3	N-G	0.200136			2	N-G	0.26977			3	N-G	0.163084
3	N-G	0.203647			2	N-G	0.543033			3	N-G	0.21061
3	N-G	0.167624			2	N-G	0.397273			3	N-G	0.295994
3	N-G	0.117677			2	N-G	0.287931			3	N-G	0.104566
3	N-G	0.11186			2	N-G	0.710615			3	N-G	0.133132
3	N-G	0.116742			2	N-G	0.502688			3	N-G	0.17469
3	N-G	0.12211			2	N-G	0.585148			3	N-G	0.320216
3	N-G	0.0616302			2	N-G	0.473038			3	N-G	0.333473
3	N-G	0.111774			2	N-G	0.531032			3	N-G	0.311095
3	N-G	0.0728346			2	N-G	0.278403			3	N-G	0.257412
3	N-G	0.104122			2	N-G	0.346386			3	N-G	0.35371
3	N-G	0.0946036			2	N-G	0.362748			3	N-G	0.31186
3	N-G	0.111975			2	N-G	0.290117			3	N-G	0.275205
3	N-G	0.109849			2	N-G	0.417969			3	N-G	0.315564
3	N-G	0.0793092			2	N-G	0.347978			3	N-G	0.237752
3	N-G	0.157419			2	N-G	0.329956			3	N-G	0.27198
3	N-G	0.209016			2	N-G	0.469617			3	N-G	0.307687
3	N-G	0.160102			2	N-G	0.483108			3	N-G	0.254617
3	N-G	0.195857			2	N-G	0.276186			3	N-G	0.0855681
3	N-G	0.232524			2	N-G	0.512547			3	N-G	0.0657452
3	N-G	0.268974			2	N-G	0.513696			3	N-G	0.107814
1	G-N	0.056345			2	N-G	0.44441			3	N-G	0.0954068
1	G-N	0.045649			2	G-N	0.196143			1	G-N	0.189195
1	G-N	0.0394176			2	G-N	0.146248			1	G-N	0.164875
1	G-N	0.0408403			2	G-N	0.135775			1	G-N	0.113956
1	G-N	0.0576449			2	G-N	0.204975			1	G-N	0.198364
1	G-N	0.0394176			2	G-N	0.117283			1	G-N	0.189195
1	G-N	0.0620641			2	G-N	0.103882			1	G-N	0.100886
1	G-N	0.0265829			2	G-N	0.168093			1	G-N	0.115037
1	G-N	0.0317832			2	G-N	0.121179			1	G-N	0.104025
1	G-N	0.048202			2	G-N	0.206378			1	G-N	0.11803
1	G-N	0.0369231			2	G-N	0.105288			1	G-N	0.133181
1	G-N	0.0356586			2	G-N	0.130422			1	G-N	0.163732
1	G-N	0.0465476			2	G-N	0.127116			1	G-N	0.133082
1	G-N	0.0665341			2	G-N	0.169944			1	G-N	0.329578
1	G-N	0.0379702			2	G-N	0.198042			1	G-N	0.240977
1	G-N	0.0598713			2	G-N	0.176833			1	G-N	0.229764
1	G-N	0.0354919			2	G-N	0.118968			1	G-N	0.211622
1	G-N	0.0547584			2	G-N	0.148795			1	G-N	0.255411
1	G-N	0.0843501			2	G-N	0.0999276			1	G-N	0.208703
1	G-N	0.093109			2	G-N	0.219991			1	G-N	0.124609
1	G-N	0.0615335			2	G-N	0.190687			1	G-N	0.163193
1	G-N	0.123767			2	G-N	0.26476			1	G-N	0.108147
1	G-N	0.0559692			2	G-N	0.243954			1	G-N	0.146967
1	G-N	0.028282			2	G-N	0.237337			1	G-N	0.142913
1	G-N	0.0467333			2	G-N	0.162448			1	G-N	0.161698
1	G-N	0.046835			2	G-N	0.211931			1	G-N	0.0719248
1	G-N	0.0314175			2	G-N	0.199331			1	G-N	0.0399538
1	G-N	0.0189022			2	G-N	0.202879			1	G-N	0.0437483
1	G-N	0.0243451			2	G-N	0.167893			1	G-N	0.0603429
1	G-N	0.0439226			2	G-N	0.170622			1	G-N	0.044943
1	G-N	0.033328			2	G-N	0.220569			1	G-N	0.0369542
2	G-N	0.0215687			3	N-G	0.667722			2	G-N	0.145615
2	G-N	0.012124			3	N-G	0.353113			2	G-N	0.180834
2	G-N	0.0259901			3	N-G	0.479713			2	G-N	0.161479
2	G-N	0.0173493			3	N-G	0.498872			2	G-N	0.116449
2	G-N	0.00943199			3	N-G	0.567415			2	G-N	0.144924
2	G-N	0.073241			3	N-G	0.421312			2	G-N	0.110702
2	G-N	0.0381313			3	N-G	0.295206			2	G-N	0.281439
2	G-N	0.0572397			3	N-G	0.393088			2	G-N	0.198413
2	G-N	0.0652462			3	N-G	0.40851			2	G-N	0.0957757
2	G-N	0.0691556			3	N-G	0.345923			2	G-N	0.10969
2	G-N	0.0806906			3	N-G	0.22492			2	G-N	0.165107
2	G-N	0.0660839			3	N-G	0.25562			2	G-N	0.173002
2	G-N	0.0675506			3	N-G	0.990736			2	G-N	0.138666
2	G-N	0.0687023			3	N-G	0.754445			2	G-N	0.208449
2	G-N	0.0748945			3	N-G	0.577931			2	G-N	0.234181
2	G-N	0.0386126			3	N-G	0.883428			2	G-N	0.209428
2	G-N	0.0774097			3	N-G	0.583731			2	G-N	0.251212
2	G-N	0.152308			3	N-G	0.737503			2	G-N	0.288842
2	G-N	0.110776			3	N-G	0.208245			2	G-N	0.107259
2	G-N	0.213374			3	N-G	0.287047			2	G-N	0.140877
2	G-N	0.153092			3	N-G	0.228468			2	G-N	0.0939731
2	G-N	0.0670754			3	N-G	0.19993			2	G-N	0.0620801
2	G-N	0.0198304			3	N-G	0.257049			2	G-N	0.0873782
2	G-N	0.148344			3	N-G	0.2869			2	G-N	0.0541026
2	G-N	0.036505			3	N-G	0.314887			2	G-N	0.123241
2	G-N	0.141076			3	N-G	0.283851			2	G-N	0.0987289
2	G-N	0.137437			3	N-G	0.223821			2	G-N	0.0987289
2	G-N	0.0485598			3	N-G	0.223665			2	G-N	0.123241
2	G-N	0.0102299			3	N-G	0.259887			2	G-N	0.114212
3	G-N	0.117694			3	N-G	0.281031			2	G-N	0.0987289
3	G-N	0.0854171			3	G-N	0.324866			2	G-N	0.0865875
3	G-N	0.084492			3	G-N	0.438564			2	G-N	0.135727
3	G-N	0.0814629			3	G-N	0.319109			2	G-N	0.0764611
3	G-N	0.149443			3	G-N	0.263412			3	G-N	0.0851784
3	G-N	0.0877725			3	G-N	0.358907			3	G-N	0.0619346
3	G-N	0.0997586			3	G-N	0.46166			3	G-N	0.0798587
3	G-N	0.0601291			3	G-N	0.325491			3	G-N	0.129024
3	G-N	0.0687476			3	G-N	0.303362			3	G-N	0.152138
3	G-N	0.0377785			3	G-N	0.335495			3	G-N	0.084032
3	G-N	0.0174362			3	G-N	0.400265			3	G-N	0.076078
3	G-N	0.0371111			3	G-N	0.308137			3	G-N	0.0922174
3	G-N	0.0834105			3	G-N	0.315807			3	G-N	0.0608921
3	G-N	0.0734474			3	G-N	0.0912635			3	G-N	0.185759
3	G-N	0.117553			3	G-N	0.159578			3	G-N	0.207271
3	G-N	0.11193			3	G-N	0.112315			3	G-N	0.141778
3	G-N	0.0197342			3	G-N	0.147148			3	G-N	0.132266
3	G-N	0.096277			3	G-N	0.112624			3	G-N	0.118279
3	G-N	0.113553			3	G-N	0.100876			3	G-N	0.0699954
3	G-N	0.0947865			3	G-N	0.162129			3	G-N	0.143629
3	G-N	0.0654742			3	G-N	0.11486			3	G-N	0.133124
3	G-N	0.0546623			3	G-N	0.129125			3	G-N	0.130384
3	G-N	0.0811219			3	G-N	0.218643			3	G-N	0.138284
3	G-N	0.0794413			3	G-N	0.132817			3	G-N	0.125967
3	G-N	0.0346124			3	G-N	0.145042			3	G-N	0.221159
3	G-N	0.109862			3	G-N	0.280176			3	G-N	0.258458
3	G-N	0.0970713			3	G-N	0.207433			3	G-N	0.20992
3	G-N	0.0787733			3	G-N	0.303034			3	G-N	0.261011
3	G-N	0.0826126			3	G-N	0.209509			3	G-N	0.106825
3	G-N	0.0275135			3	G-N	0.200997			3	G-N	0.0832733
3	G-N	0.0423673			3	G-N	0.202325			3	G-N	0.0835939
3	G-N	0.0290476								3	G-N	0.187893
										3	G-N	0.160435
										3	G-N	0.244041
