# Supplementary material for: The relative binding position of Nck and Grb2 adaptors impacts actin-based motility of Vaccinia virus
Source: eLife journal article supplement (doi:10.7554/elife.74655), 2022-07-07
Supplement: supp [file Fig5B_source data.xlsx]

## Sheet: Sheet1
replicate	condition	GFP Nck/RFP			replicate	condition	GFP N-WASP/RFP
1	N-G	0.110922			1	N-G	0.463685
1	N-G	0.357199			1	N-G	0.298769
1	N-G	0.271316			1	N-G	0.288048
1	N-G	0.357199			1	N-G	0.134714
1	N-G	0.218618			1	N-G	0.317364
1	N-G	0.265748			1	N-G	0.19243
1	N-G	0.101878			1	N-G	0.122778
1	N-G	0.0958776			1	N-G	0.149503
1	N-G	0.129266			1	N-G	0.148131
1	N-G	0.0533991			1	N-G	0.1832
1	N-G	0.130857			1	N-G	0.139868
1	N-G	0.121169			1	N-G	0.283186
1	N-G	0.0897268			1	N-G	0.219286
1	N-G	0.152203			1	N-G	0.148939
1	N-G	0.0707192			1	N-G	0.193371
1	N-G	0.153556			1	N-G	0.280739
1	N-G	0.084897			1	N-G	0.157901
1	N-G	0.199912			1	N-G	0.21719
1	N-G	0.177375			1	N-G	0.404607
1	N-G	0.086015			1	N-G	0.165195
1	N-G	0.132898			1	N-G	0.163958
1	N-G	0.0922367			1	N-G	0.220882
1	N-G	0.114477			1	N-G	0.186805
1	G-N	0.0568463			1	N-G	0.0788982
1	G-N	0.0953438			1	N-G	0.194769
1	G-N	0.0717045			1	N-G	0.216258
1	G-N	0.0603435			1	N-G	0.274021
1	G-N	0.0551101			1	G-N	0.0786517
1	G-N	0.145775			1	G-N	0.0882681
1	G-N	0.273902			1	G-N	0.0780202
1	G-N	0.225821			1	G-N	0.120969
1	G-N	0.16343			1	G-N	0.103973
1	G-N	0.112477			1	G-N	0.0860614
1	G-N	0.134245			1	G-N	0.0975942
1	G-N	0.249334			1	G-N	0.0795736
1	G-N	0.305052			1	G-N	0.0908692
1	G-N	0.171859			1	G-N	0.0805223
1	G-N	0.162022			1	G-N	0.0675486
1	G-N	0.145866			1	G-N	0.11007
1	G-N	0.149717			1	G-N	0.0701532
1	G-N	0.145415			1	G-N	0.0821865
1	G-N	0.239365			1	G-N	0.102237
1	G-N	0.143858			1	G-N	0.114182
1	G-N	0.120823			1	G-N	0.215124
1	G-N	0.119377			1	G-N	0.180535
1	G-N	0.112404			1	G-N	0.263021
1	G-N	0.151805			1	G-N	0.126113
1	G-N	0.172535			1	G-N	0.16986
1	G-N	0.0762206			1	G-N	0.166582
2	N-G	0.228046			1	G-N	0.208045
2	N-G	0.132474			1	G-N	0.094659
2	N-G	0.117725			1	G-N	0.0732714
2	N-G	0.164254			1	G-N	0.0967128
2	N-G	0.137739			1	G-N	0.124015
2	N-G	0.196373			2	N-G	0.22835
2	N-G	0.313827			2	N-G	0.170201
2	N-G	0.38289			2	N-G	0.21756
2	N-G	0.305846			2	N-G	0.122975
2	N-G	0.359166			2	N-G	0.177645
2	N-G	0.371548			2	N-G	0.233891
2	N-G	0.322653			2	N-G	0.29871
2	N-G	0.251335			2	N-G	0.345923
2	N-G	0.196458			2	N-G	0.139605
2	N-G	0.330302			2	N-G	0.18719
2	N-G	0.194742			2	N-G	0.179708
2	N-G	0.393952			2	N-G	0.190352
2	N-G	0.389341			2	N-G	0.190185
2	N-G	0.331566			2	N-G	0.295561
2	N-G	0.337125			2	N-G	0.369358
2	N-G	0.437953			2	N-G	0.227532
2	N-G	0.518955			2	N-G	0.25289
2	N-G	0.263697			2	N-G	0.265427
2	N-G	0.278367			2	N-G	0.332927
2	N-G	0.235249			2	N-G	0.214491
2	N-G	0.357012			2	N-G	0.297293
2	N-G	0.117984			2	N-G	0.294845
2	N-G	0.171149			2	N-G	0.40234
2	N-G	0.127408			2	N-G	0.136521
2	G-N	0.314257			2	N-G	0.132972
2	G-N	0.281353			2	N-G	0.147175
2	G-N	0.194302			2	N-G	0.284615
2	G-N	0.556978			2	N-G	0.41938
2	G-N	0.628739			2	G-N	0.140302
2	G-N	0.306304			2	G-N	0.22896
2	G-N	0.383438			2	G-N	0.113718
2	G-N	0.225138			2	G-N	0.202986
2	G-N	0.380618			2	G-N	0.230599
2	G-N	0.271203			2	G-N	0.152033
2	G-N	0.242263			2	G-N	0.149402
2	G-N	0.444933			2	G-N	0.282218
2	G-N	0.250641			2	G-N	0.178403
2	G-N	0.252676			2	G-N	0.558796
2	G-N	0.460762			2	G-N	0.147233
2	G-N	0.26904			2	G-N	0.168485
2	G-N	0.235328			2	G-N	0.178112
2	G-N	0.093154			2	G-N	0.128339
2	G-N	0.462538			2	G-N	0.183705
2	G-N	0.226524			2	G-N	0.11285
2	G-N	0.758917			2	G-N	0.0892965
2	G-N	0.412319			2	G-N	0.110389
2	G-N	0.279448			2	G-N	0.093376
2	G-N	0.505995			2	G-N	0.100537
2	G-N	0.218174			2	G-N	0.0767212
2	G-N	0.171555			2	G-N	0.102112
3	N-G	0.618348			2	G-N	0.0735195
3	N-G	1.02056			2	G-N	0.071967
3	N-G	0.146828			2	G-N	0.0617527
3	N-G	0.165595			2	G-N	0.0818272
3	N-G	0.109743			3	N-G	0.321101
3	N-G	0.325667			3	N-G	0.285449
3	N-G	0.502419			3	N-G	0.4364
3	N-G	0.31356			3	N-G	0.361127
3	N-G	0.168139			3	N-G	0.125027
3	N-G	0.193451			3	N-G	0.238255
3	N-G	0.201762			3	N-G	0.227447
3	N-G	0.0780095			3	N-G	0.260319
3	N-G	0.1809			3	N-G	0.190617
3	N-G	0.254675			3	N-G	0.113231
3	N-G	0.156586			3	N-G	0.0885045
3	N-G	0.118169			3	N-G	0.130109
3	N-G	0.112952			3	N-G	0.487146
3	N-G	0.0839355			3	N-G	0.276676
3	N-G	0.165269			3	N-G	0.143305
3	N-G	0.332348			3	N-G	0.329452
3	N-G	0.402235			3	N-G	0.287612
3	N-G	0.386585			3	N-G	0.270066
3	N-G	0.310191			3	N-G	0.335126
3	N-G	0.157613			3	N-G	0.322839
3	N-G	0.191466			3	N-G	0.326318
3	N-G	0.137636			3	N-G	0.288227
3	N-G	0.166295			3	G-N	0.0546941
3	N-G	0.0425347			3	G-N	0.0562199
3	G-N	0.0691985			3	G-N	0.117811
3	G-N	0.0709677			3	G-N	0.084158
3	G-N	0.131127			3	G-N	0.0698377
3	G-N	0.402441			3	G-N	0.162048
3	G-N	0.127508			3	G-N	0.111263
3	G-N	0.170029			3	G-N	0.0957538
3	G-N	0.19065			3	G-N	0.102234
3	G-N	0.170841			3	G-N	0.106939
3	G-N	0.134998			3	G-N	0.147436
3	G-N	0.15612			3	G-N	0.0686394
3	G-N	0.134998			3	G-N	0.0437048
3	G-N	0.0996338			3	G-N	0.033209
3	G-N	0.0945279			3	G-N	0.0304986
3	G-N	0.108202			3	G-N	0.0296566
3	G-N	0.319748			3	G-N	0.0326671
3	G-N	0.146638			3	G-N	0.0317694
3	G-N	0.0877986			3	G-N	0.167419
3	G-N	0.217508			3	G-N	0.147009
3	G-N	0.627397			3	G-N	0.188137
3	G-N	0.376385			3	G-N	0.146997
3	G-N	0.37988
3	G-N	0.315182
3	G-N	0.367359
3	G-N	0.478143
3	G-N	0.251326
3	G-N	0.35813
3	G-N	0.367359
3	G-N	0.372772
