# Supplementary material for: The relative binding position of Nck and Grb2 adaptors impacts actin-based motility of Vaccinia virus
Source: eLife journal article supplement (doi:10.7554/elife.74655), 2022-07-07
Supplement: supp [file Fig5C_source data.xlsx]

## Sheet: Sheet1
replicate	condition	GFP Nck:RFP		replicate	condition	GFP N-WASP/RFP
2	N-G	0.0558813		1	N-G	0.495833
2	N-G	0.0657671		1	N-G	0.353274
2	N-G	0.0685746		1	N-G	0.272237
2	N-G	0.114728		1	N-G	0.421234
2	N-G	0.0446526		1	N-G	0.261345
2	N-G	0.0430654		1	N-G	0.206203
2	N-G	0.42323		1	N-G	0.15999
2	N-G	0.191639		1	N-G	0.224409
2	N-G	0.399382		1	N-G	0.266202
2	N-G	0.430218		1	N-G	0.221623
2	N-G	0.328311		1	N-G	0.359086
2	N-G	0.131259		1	N-G	0.365483
2	N-G	0.0603405		1	N-G	0.210402
2	N-G	0.0684593		1	N-G	0.0750876
2	N-G	0.0879269		1	N-G	0.0442536
2	N-G	0.151173		1	N-G	0.0576581
2	N-G	0.110879		1	N-G	0.0606999
2	N-G	0.164055		1	N-G	0.067262
2	N-G	0.0905075		1	N-G	0.509512
2	N-G	0.0953525		1	N-G	0.454936
2	N-G	0.054771		1	N-G	0.600456
2	N-G	0.100997		1	N-G	0.645105
2	N-G	0.0862163		1	N-G	0.499401
2	N-G	0.0998827		1	N-G	0.568462
2	N-G	0.0610603		1	N-G	0.523492
2	N-G	0.0614759		1	N-G	0.257498
2	N-G	0.0308167		1	N-G	0.428
2	G-N	0.145615		1	N-G	0.558563
2	G-N	0.180834		1	N-G	0.56646
2	G-N	0.161479		1	N-G	0.545024
2	G-N	0.116449		1	G-N	0.0511299
2	G-N	0.144924		1	G-N	0.0498238
2	G-N	0.110702		1	G-N	0.0598537
2	G-N	0.281439		1	G-N	0.101605
2	G-N	0.198413		1	G-N	0.056553
2	G-N	0.0957757		1	G-N	0.0418497
2	G-N	0.10969		1	G-N	0.232023
2	G-N	0.165107		1	G-N	0.154596
2	G-N	0.173002		1	G-N	0.193618
2	G-N	0.208449		1	G-N	0.208573
2	G-N	0.234181		1	G-N	0.180047
2	G-N	0.209428		1	G-N	0.112229
2	G-N	0.251212		1	G-N	0.183619
2	G-N	0.288842		1	G-N	0.217812
2	G-N	0.107259		1	G-N	0.0992525
2	G-N	0.140877		1	G-N	0.160392
2	G-N	0.0620801		1	G-N	0.13397
2	G-N	0.0873782		1	G-N	0.08816
2	G-N	0.0541026		1	G-N	0.0840208
2	G-N	0.123241		1	G-N	0.0628637
2	G-N	0.0987289		1	G-N	0.112084
2	G-N	0.0987289		1	G-N	0.120268
2	G-N	0.123241		1	G-N	0.0529856
2	G-N	0.114212		1	G-N	0.0793396
2	G-N	0.0987289		1	G-N	0.099634
2	G-N	0.0865875		1	G-N	0.0780244
2	G-N	0.135727		1	G-N	0.119516
2	G-N	0.0764611		1	G-N	0.138242
2	N-X	0.105283		1	G-N	0.0912937
2	N-X	0.170288		1	G-N	0.101226
2	N-X	0.0951986		1	N-X	0.299506
2	N-X	0.105283		1	N-X	0.128361
2	N-X	0.160616		1	N-X	0.163125
2	N-X	0.0870338		1	N-X	0.264085
2	N-X	0.0990972		1	N-X	0.213241
2	N-X	0.0760058		1	N-X	0.189836
2	N-X	0.0780704		1	N-X	0.289351
2	N-X	0.105882		1	N-X	0.228166
2	N-X	0.0659663		1	N-X	0.157483
2	N-X	0.0836978		1	N-X	0.106131
2	N-X	0.0589874		1	N-X	0.238615
2	N-X	0.0658709		1	N-X	0.187638
2	N-X	0.0433507		1	N-X	0.192474
2	N-X	0.0701612		1	N-X	0.122704
2	N-X	0.119146		1	N-X	0.142228
2	N-X	0.109214		1	N-X	0.137271
2	N-X	0.0419895		1	N-X	0.172932
2	N-X	0.0357553		1	N-X	0.152464
2	N-X	0.111607		1	N-X	0.0943916
2	N-X	0.103934		1	N-X	0.0923633
2	N-X	0.0878419		1	N-X	0.152064
2	N-X	0.0819146		1	N-X	0.0935791
2	N-X	0.0830479		1	N-X	0.0899427
1	N-G	0.252265		1	N-X	0.0928323
1	N-G	0.23191		1	N-X	0.109629
1	N-G	0.259861		1	N-X	0.108605
1	N-G	0.209387		1	N-X	0.0869235
1	N-G	0.28806		1	N-X	0.0641082
1	N-G	0.2455		1	N-X	0.102419
1	N-G	0.15182		1	N-X	0.0556808
1	N-G	0.182167		2	N-G	0.246747
1	N-G	0.126242		2	N-G	0.350115
1	N-G	0.132882		2	N-G	0.385128
1	N-G	0.194287		2	N-G	0.246747
1	N-G	0.132882		2	N-G	0.312962
1	N-G	0.120492		2	N-G	0.311002
1	N-G	0.113834		2	N-G	0.0806747
1	N-G	0.0763892		2	N-G	0.107638
1	N-G	0.110952		2	N-G	0.101868
1	N-G	0.0733273		2	N-G	0.293587
1	N-G	0.107457		2	N-G	0.190884
1	N-G	0.155817		2	N-G	0.0685778
1	N-G	0.194044		2	N-G	0.098247
1	N-G	0.170711		2	N-G	0.161723
1	N-G	0.172315		2	N-G	0.305348
1	N-G	0.194195		2	N-G	0.226018
1	N-G	0.150578		2	N-G	0.174304
1	N-G	0.190682		2	N-G	0.285739
1	N-G	0.184269		2	N-G	0.224497
1	N-G	0.168256		2	N-G	0.400481
1	N-G	0.23786		2	N-G	0.341049
1	N-G	0.218683		2	N-G	0.277716
1	N-G	0.168717		2	N-G	0.205893
1	G-N	0.189195		2	N-G	0.279124
1	G-N	0.164875		2	N-G	0.454055
1	G-N	0.113956		2	N-G	0.384775
1	G-N	0.198364		2	N-G	0.175734
1	G-N	0.189195		2	N-G	0.199823
1	G-N	0.100886		2	N-G	0.139541
1	G-N	0.115037		2	N-G	0.156514
1	G-N	0.104025		2	G-N	0.233745
1	G-N	0.11803		2	G-N	0.34445
1	G-N	0.133181		2	G-N	0.194332
1	G-N	0.163732		2	G-N	0.342249
1	G-N	0.133082		2	G-N	0.261515
1	G-N	0.329578		2	G-N	0.27352
1	G-N	0.240977		2	G-N	0.154808
1	G-N	0.229764		2	G-N	0.0787096
1	G-N	0.211622		2	G-N	0.0626646
1	G-N	0.255411		2	G-N	0.105538
1	G-N	0.208703		2	G-N	0.154808
1	G-N	0.163193		2	G-N	0.0722042
1	G-N	0.108147		2	G-N	0.0874524
1	G-N	0.146967		2	G-N	0.0717172
1	G-N	0.142913		2	G-N	0.0698333
1	G-N	0.161698		2	G-N	0.0736783
1	G-N	0.0719248		2	G-N	0.0839836
1	G-N	0.0399538		2	G-N	0.0653937
1	G-N	0.0437483		2	G-N	0.113467
1	G-N	0.0603429		2	G-N	0.105822
1	G-N	0.044943		2	G-N	0.161417
1	G-N	0.0369542		2	G-N	0.0731442
1	N-X	0.0968068		2	G-N	0.10198
1	N-X	0.105283		2	G-N	0.106559
1	N-X	0.0944378		2	G-N	0.148921
1	N-X	0.104008		2	G-N	0.168015
1	N-X	0.129801		2	G-N	0.164434
1	N-X	0.302708		2	G-N	0.16555
1	N-X	0.129801		2	G-N	0.193063
1	N-X	0.265827		2	G-N	0.164914
1	N-X	0.188017		2	N-X	0.390768
1	N-X	0.210341		2	N-X	0.239073
1	N-X	0.124454		2	N-X	0.422068
1	N-X	0.0982602		2	N-X	0.389101
1	N-X	0.069462		2	N-X	0.170219
1	N-X	0.103783		2	N-X	0.352953
1	N-X	0.0543275		2	N-X	0.20822
1	N-X	0.134218		2	N-X	0.297441
1	N-X	0.120689		2	N-X	0.191676
1	N-X	0.140669		2	N-X	0.157699
1	N-X	0.189492		2	N-X	0.149908
1	N-X	0.223405		2	N-X	0.320458
1	N-X	0.239683		2	N-X	0.368269
1	N-X	0.264897		2	N-X	0.421713
1	N-X	0.232637		2	N-X	0.435983
1	N-X	0.205384		2	N-X	0.310978
1	N-X	0.165706		2	N-X	0.241893
3	N-G	0.0925766		2	N-X	0.299888
3	N-G	0.0661083		2	N-X	0.23242
3	N-G	0.0706087		2	N-X	0.23834
3	N-G	0.0593721		2	N-X	0.298658
3	N-G	0.0850881		2	N-X	0.379305
3	N-G	0.111867		2	N-X	0.169897
3	N-G	0.280648		2	N-X	0.197683
3	N-G	0.303356		2	N-X	0.216617
3	N-G	0.249837		2	N-X	0.413885
3	N-G	0.319914		2	N-X	0.143732
3	N-G	0.160183		2	N-X	0.231514
3	N-G	0.455214		2	N-X	0.33829
3	N-G	0.129933		2	N-X	0.178393
3	N-G	0.164147		3	N-G	0.339556
3	N-G	0.142166		3	N-G	0.358528
3	N-G	0.259579		3	N-G	0.291418
3	N-G	0.163395		3	N-G	0.297747
3	N-G	0.190757		3	N-G	0.282538
3	N-G	0.199542		3	N-G	0.232062
3	N-G	0.169157		3	N-G	0.259065
3	N-G	0.123253		3	N-G	0.224718
3	N-G	0.118718		3	N-G	0.21557
3	N-G	0.166203		3	N-G	0.408608
3	N-G	0.178828		3	N-G	0.278934
3	N-G	0.182821		3	N-G	0.278261
3	N-G	0.181755		3	N-G	0.423175
3	N-G	0.29891		3	N-G	0.30741
3	N-G	0.152688		3	N-G	0.24725
3	N-G	0.127282		3	N-G	0.244309
3	N-G	0.238627		3	N-G	0.208765
3	G-N	0.241263		3	N-G	0.216602
3	G-N	0.191242		3	N-G	0.301397
3	G-N	0.153392		3	N-G	0.34141
3	G-N	0.139577		3	N-G	0.254017
3	G-N	0.171139		3	N-G	0.313883
3	G-N	0.225801		3	N-G	0.262031
3	G-N	0.390851		3	N-G	0.204565
3	G-N	0.389991		3	N-G	0.337484
3	G-N	0.380481		3	N-G	0.201518
3	G-N	0.405912		3	N-G	0.242521
3	G-N	0.410659		3	N-G	0.19281
3	G-N	0.321264		3	N-G	0.168769
3	G-N	0.289026		3	N-G	0.30402
3	G-N	0.17486		3	G-N	0.192357
3	G-N	0.185704		3	G-N	0.140544
3	G-N	0.298661		3	G-N	0.150322
3	G-N	0.205357		3	G-N	0.138044
3	G-N	0.247689		3	G-N	0.14433
3	G-N	0.18386		3	G-N	0.101845
3	G-N	0.130636		3	G-N	0.0776686
3	G-N	0.135181		3	G-N	0.0376707
3	G-N	0.162084		3	G-N	0.0837075
3	G-N	0.18386		3	G-N	0.0743762
3	G-N	0.168587		3	G-N	0.0964349
3	G-N	0.334693		3	G-N	0.0719153
3	G-N	0.231161		3	G-N	0.161524
3	G-N	0.20559		3	G-N	0.109241
3	G-N	0.27978		3	G-N	0.235857
3	G-N	0.247253		3	G-N	0.193295
3	G-N	0.226775		3	G-N	0.151577
3	N-X	0.334693		3	G-N	0.141483
3	N-X	0.20559		3	G-N	0.13728
3	N-X	0.247253		3	G-N	0.154074
3	N-X	0.19464		3	G-N	0.11674
3	N-X	0.191212		3	G-N	0.138285
3	N-X	0.130961		3	G-N	0.128421
3	N-X	0.361538		3	G-N	0.085427
3	N-X	0.400434		3	G-N	0.152355
3	N-X	0.352957		3	G-N	0.0694141
3	N-X	0.404568		3	G-N	0.114116
3	N-X	0.35877		3	G-N	0.0895631
3	N-X	0.262325		3	G-N	0.0906475
3	N-X	0.131527		3	G-N	0.118616
3	N-X	0.108604		3	N-X	0.0930617
3	N-X	0.139956		3	N-X	0.0901893
3	N-X	0.164072		3	N-X	0.105564
3	N-X	0.173004		3	N-X	0.10083
3	N-X	0.140946		3	N-X	0.127738
3	N-X	0.233211		3	N-X	0.0771194
3	N-X	0.188616		3	N-X	0.369501
3	N-X	0.173974		3	N-X	0.34566
3	N-X	0.160535		3	N-X	0.23936
3	N-X	0.167318		3	N-X	0.248308
3	N-X	0.167261		3	N-X	0.364878
3	N-X	0.0731307		3	N-X	0.239793
3	N-X	0.0526696		3	N-X	0.286653
3	N-X	0.0790599		3	N-X	0.28953
3	N-X	0.0566534		3	N-X	0.237627
3	N-X	0.102771		3	N-X	0.228169
3	N-X	0.044723		3	N-X	0.255121
				3	N-X	0.209135
				3	N-X	0.175324
				3	N-X	0.191369
				3	N-X	0.0986995
				3	N-X	0.133496
				3	N-X	0.13912
				3	N-X	0.146358
				3	N-X	0.214852
				3	N-X	0.253568
				3	N-X	0.113219
				3	N-X	0.130856
				3	N-X	0.151861
				3	N-X	0.113219
