# Supplementary material for: The relative binding position of Nck and Grb2 adaptors impacts actin-based motility of Vaccinia virus
Source: eLife journal article supplement (doi:10.7554/elife.74655), 2022-07-07
Supplement: supp [file Fig6-suppl1C_source data.xlsx]

## Sheet: Sheet1
replicate	condition	pY132 ab intensity
1	all stars	30714.5
1	all stars	2559.5
1	all stars	10265.5
1	all stars	9626.5
1	all stars	12576.5
1	all stars	60064
1	all stars	16833.5
1	all stars	11537
1	all stars	13386.5
1	all stars	40403.5
1	all stars	31979
1	all stars	25534.5
1	all stars	2874.5
1	all stars	58210.5
1	all stars	46280
1	all stars	19345
1	all stars	49254
1	all stars	46195.4
1	all stars	34161
1	all stars	21661
1	all stars	31415
1	all stars	69103
1	all stars	16670
1	all stars	86259.5
1	all stars	51018.5
1	Grb2 siRNA	52943
1	Grb2 siRNA	49786
1	Grb2 siRNA	61992.5
1	Grb2 siRNA	45294.5
1	Grb2 siRNA	26236
1	Grb2 siRNA	59097.5
1	Grb2 siRNA	86354
1	Grb2 siRNA	60721
1	Grb2 siRNA	57202.5
1	Grb2 siRNA	5387
1	Grb2 siRNA	22602.5
1	Grb2 siRNA	42896.5
1	Grb2 siRNA	74269.5
1	Grb2 siRNA	41111
1	Grb2 siRNA	41990
1	Grb2 siRNA	59506.5
1	Grb2 siRNA	10051
1	Grb2 siRNA	23173.5
1	Grb2 siRNA	30807
1	Grb2 siRNA	34141.5
1	Grb2 siRNA	43898.5
1	Grb2 siRNA	23342
1	Grb2 siRNA	42828.5
1	Grb2 siRNA	30916.5
2	all stars	43057.5
2	all stars	51991
2	all stars	3530
2	all stars	26433.5
2	all stars	2167.5
2	all stars	3863
2	all stars	3383.5
2	all stars	1405
2	all stars	45822
2	all stars	84746
2	all stars	78586.5
2	all stars	107975
2	all stars	47527.5
2	all stars	72467.5
2	all stars	51112.5
2	all stars	43608
2	all stars	34665.5
2	all stars	30941.5
2	all stars	79956
2	all stars	71828
2	all stars	58423
2	all stars	42319
2	all stars	48199.5
2	all stars	18940
2	Grb2 siRNA	154545
2	Grb2 siRNA	79662.5
2	Grb2 siRNA	113211
2	Grb2 siRNA	57547.5
2	Grb2 siRNA	77955
2	Grb2 siRNA	77236
2	Grb2 siRNA	58877.5
2	Grb2 siRNA	69836.5
2	Grb2 siRNA	32692
2	Grb2 siRNA	60511.5
2	Grb2 siRNA	38537.5
2	Grb2 siRNA	88446.5
2	Grb2 siRNA	82849
2	Grb2 siRNA	93906.5
2	Grb2 siRNA	79951
2	Grb2 siRNA	73492
2	Grb2 siRNA	101382
2	Grb2 siRNA	64678
2	Grb2 siRNA	40356.5
2	Grb2 siRNA	56120
2	Grb2 siRNA	44713.5
2	Grb2 siRNA	40140
3	all stars	64035.5
3	all stars	36889
3	all stars	67405.5
3	all stars	72616
3	all stars	63534.5
3	all stars	48685
3	all stars	47311.5
3	all stars	45988.5
3	all stars	45690
3	all stars	49930
3	all stars	68552
3	all stars	41266.5
3	all stars	17862.5
3	all stars	19024
3	all stars	20099
3	all stars	20135
3	all stars	61870.5
3	all stars	33704.5
3	all stars	74623
3	all stars	33937.5
3	all stars	76454
3	all stars	62703
3	all stars	63311.5
3	all stars	93578.5
3	Grb2 siRNA	79195.5
3	Grb2 siRNA	131536
3	Grb2 siRNA	105034
3	Grb2 siRNA	98563
3	Grb2 siRNA	87520
3	Grb2 siRNA	67895.5
3	Grb2 siRNA	78449.5
3	Grb2 siRNA	48073
3	Grb2 siRNA	118270
3	Grb2 siRNA	106246
3	Grb2 siRNA	119882
3	Grb2 siRNA	86835.5
3	Grb2 siRNA	160340
3	Grb2 siRNA	149726
3	Grb2 siRNA	106700
3	Grb2 siRNA	192914
3	Grb2 siRNA	88395
3	Grb2 siRNA	78175
3	Grb2 siRNA	57332.5
3	Grb2 siRNA	47347
3	Grb2 siRNA	45557
3	Grb2 siRNA	53229.5
3	Grb2 siRNA	64982
3	Grb2 siRNA	86299.5
3	Grb2 siRNA	62701.5
