# Supplementary material for: The relative binding position of Nck and Grb2 adaptors impacts actin-based motility of Vaccinia virus
Source: eLife journal article supplement (doi:10.7554/elife.74655), 2022-07-07
Supplement: supp [file Fig6A_source data.xlsx]

## Sheet: Sheet1
replicate	condition	Src-GFP/RFP
1	N-G	0.765946
1	N-G	0.698996
1	N-G	0.631949
1	N-G	0.606073
1	N-G	0.441381
1	N-G	0.648401
1	N-G	0.506463
1	N-G	0.680904
1	N-G	0.278091
1	N-G	0.156844
1	N-G	0.513585
1	N-G	0.454713
1	N-G	0.0895809
1	N-G	0.0561573
1	N-G	0.0602043
1	N-G	0.0854725
1	N-G	0.0831474
1	N-G	0.0518315
1	N-G	0.0795602
1	N-G	0.0622435
1	N-G	0.114818
1	N-G	0.0925086
1	N-G	0.0910705
1	N-G	0.101091
1	N-G	0.122074
1	N-G	0.125632
1	N-G	0.159202
1	N-G	0.122074
1	N-G	0.168583
1	N-G	0.0992841
1	N-G	0.135534
1	N-G	0.305482
1	N-G	0.412192
1	G-N	0.377767
1	G-N	0.201132
1	G-N	0.225516
1	G-N	0.221637
1	G-N	0.275155
1	G-N	0.250477
1	G-N	0.041646
1	G-N	0.0436117
1	G-N	0.0736229
1	G-N	0.118915
1	G-N	0.284559
1	G-N	0.13661
1	G-N	0.315206
1	G-N	0.539632
1	G-N	0.604742
1	G-N	0.560278
1	G-N	0.478115
1	G-N	0.604742
1	G-N	0.118668
1	G-N	0.0556552
1	G-N	0.0321543
1	G-N	0.0550049
1	G-N	0.101813
1	G-N	0.123054
1	G-N	0.105282
1	G-N	0.108318
1	G-N	0.269534
1	G-N	0.117181
1	G-N	0.278987
2	N-G	0.365819
2	N-G	0.455866
2	N-G	0.25156
2	N-G	0.16426
2	N-G	0.0979519
2	N-G	0.102997
2	N-G	0.194946
2	N-G	0.150037
2	N-G	0.219626
2	N-G	0.318172
2	N-G	0.384771
2	N-G	0.575624
2	N-G	0.307592
2	N-G	0.351428
2	N-G	0.415398
2	N-G	0.643493
2	N-G	0.309089
2	N-G	0.368611
2	N-G	0.40508
2	N-G	0.301921
2	N-G	0.438625
2	N-G	0.256891
2	N-G	0.203918
2	N-G	0.448299
2	N-G	0.469655
2	G-N	0.393832
2	G-N	0.352516
2	G-N	0.29087
2	G-N	0.425188
2	G-N	0.389013
2	G-N	0.330658
2	G-N	0.450306
2	G-N	0.312985
2	G-N	0.379786
2	G-N	0.313
2	G-N	0.325139
2	G-N	0.275278
2	G-N	0.32274
2	G-N	0.233697
2	G-N	0.280392
2	G-N	0.303446
2	G-N	0.341639
2	G-N	0.323271
2	G-N	0.714386
2	G-N	0.496756
2	G-N	0.659595
2	G-N	0.582131
2	G-N	0.462539
2	G-N	0.448181
2	G-N	0.411632
2	G-N	0.59064
2	G-N	0.380395
2	G-N	0.583711
2	G-N	0.192052
2	G-N	0.278169
2	G-N	0.407319
3	N-G	1.02054
3	N-G	0.530852
3	N-G	0.940691
3	N-G	0.700375
3	N-G	0.725005
3	N-G	0.273312
3	N-G	0.248563
3	N-G	0.33632
3	N-G	0.330677
3	N-G	0.0782551
3	N-G	0.129786
3	N-G	0.11165
3	N-G	0.142451
3	N-G	0.1095
3	N-G	0.122389
3	N-G	0.405333
3	N-G	0.132528
3	N-G	0.441401
3	N-G	0.621175
3	N-G	0.503228
3	N-G	0.123599
3	N-G	0.0612744
3	N-G	0.146947
3	N-G	0.204984
3	N-G	0.0569476
3	N-G	0.25681
3	N-G	0.393397
3	N-G	0.259144
3	N-G	0.257141
3	N-G	0.255487
3	N-G	0.100666
3	N-G	0.530702
3	N-G	0.926243
3	N-G	0.172844
3	N-G	0.640498
3	G-N	0.323779
3	G-N	0.0998316
3	G-N	0.59041
3	G-N	0.761188
3	G-N	0.279319
3	G-N	0.0727469
3	G-N	0.100884
3	G-N	0.0720844
3	G-N	0.0962306
3	G-N	0.0477294
3	G-N	0.0477294
3	G-N	0.0910269
3	G-N	0.0401571
3	G-N	0.389695
3	G-N	0.207605
3	G-N	0.442493
3	G-N	0.334728
3	G-N	0.1599
3	G-N	0.406198
3	G-N	0.347755
3	G-N	0.202007
3	G-N	0.27255
3	G-N	0.230612
3	G-N	0.330937
3	G-N	0.178002
3	G-N	0.373211
3	G-N	0.239555
3	G-N	0.346675
3	G-N	0.293064
3	G-N	0.294073
3	G-N	0.162454
3	G-N	0.19396
3	G-N	0.328803
3	G-N	0.124028
3	G-N	0.113467
