# Supplementary material for: The relative binding position of Nck and Grb2 adaptors impacts actin-based motility of Vaccinia virus
Source: eLife journal article supplement (doi:10.7554/elife.74655), 2022-07-07
Supplement: supp [file Fig6B_source data.xlsx]

## Sheet: Sheet1
replicate	condition	pY418 ab intensity
1	N-G	34528.5
1	N-G	30263.5
1	N-G	35161
1	N-G	27370
1	N-G	26945.5
1	N-G	58911.5
1	N-G	64276
1	N-G	27464
1	N-G	57330
1	N-G	76479
1	N-G	30100.5
1	N-G	47648.5
1	N-G	38013.5
1	N-G	49840.5
1	N-G	23076
1	N-G	70996.5
1	N-G	98381
1	N-G	55618.5
1	N-G	70996.5
1	N-G	43279.5
1	N-G	39681
1	N-G	70787.5
1	N-G	49554.5
1	N-G	33843
1	G-N	34199
1	G-N	24861.5
1	G-N	35572.5
1	G-N	35350.5
1	G-N	55983.5
1	G-N	20791
1	G-N	29609.5
1	G-N	29056.5
1	G-N	14353.5
1	G-N	24657
1	G-N	31376.5
1	G-N	21981
1	G-N	36646
1	G-N	20355.5
1	G-N	32990
1	G-N	116226
1	G-N	71330.5
1	G-N	162201
1	G-N	62386
1	G-N	51229.5
1	G-N	34666
1	G-N	49562.5
1	G-N	35451.5
1	G-N	47550
1	G-N	49025
2	N-G	15449.5
2	N-G	19680.5
2	N-G	10317.5
2	N-G	19470.5
2	N-G	20845.5
2	N-G	26413.5
2	N-G	19755.5
2	N-G	42403.5
2	N-G	89033
2	N-G	17138
2	N-G	23373
2	N-G	30473.5
2	N-G	43687
2	N-G	26503
2	N-G	33606
2	N-G	29630.5
2	N-G	27745.5
2	N-G	39780
2	N-G	23914
2	N-G	67936.5
2	N-G	26848.5
2	N-G	28473
2	N-G	45894.5
2	N-G	27626
2	G-N	26400
2	G-N	58885.5
2	G-N	31772.5
2	G-N	48450
2	G-N	57937
2	G-N	81867
2	G-N	68376.5
2	G-N	68331.5
2	G-N	65257
2	G-N	101708
2	G-N	53626
2	G-N	54672.5
2	G-N	66669
2	G-N	55293.5
2	G-N	59244.5
2	G-N	57650.5
2	G-N	38935.5
2	G-N	40981
2	G-N	51977.5
2	G-N	66845
2	G-N	45150
2	G-N	10761.5
2	G-N	9967.5
3	N-G	42560.5
3	N-G	31491.5
3	N-G	27130
3	N-G	31917
3	N-G	33914
3	N-G	40408.5
3	N-G	43310
3	N-G	32464
3	N-G	55972
3	N-G	29736
3	N-G	25029
3	N-G	31271
3	N-G	14948.5
3	N-G	26988.5
3	N-G	32395.5
3	N-G	39057.5
3	N-G	45526.5
3	N-G	36535.5
3	N-G	40009
3	N-G	49252.5
3	N-G	92186.5
3	N-G	85219
3	N-G	52380
3	N-G	44115
3	N-G	50319
3	G-N	29353.5
3	G-N	48801
3	G-N	45044.5
3	G-N	25995.5
3	G-N	34734.5
3	G-N	42923.5
3	G-N	28998
3	G-N	29836
3	G-N	26074
3	G-N	33191
3	G-N	25100.5
3	G-N	39041
3	G-N	22588.5
3	G-N	26877.5
3	G-N	29065.5
3	G-N	11152
3	G-N	35054
3	G-N	71396
3	G-N	40378
3	G-N	57430
3	G-N	23686
3	G-N	32968
3	G-N	34696.5
3	G-N	40573
