# Supplementary material for: The relative binding position of Nck and Grb2 adaptors impacts actin-based motility of Vaccinia virus
Source: eLife journal article supplement (doi:10.7554/elife.74655), 2022-07-07
Supplement: supp [file Fig6C_source data.xlsx]

## Sheet: Sheet1
replicate	condition	GFP Nck SH2/RFP
1	N-G	0.142425
1	N-G	0.0930627
1	N-G	0.0497621
1	N-G	0.155924
1	N-G	0.0803529
1	N-G	0.0780193
1	N-G	0.153604
1	N-G	0.476614
1	N-G	0.711125
1	N-G	0.755657
1	N-G	0.853106
1	N-G	0.46646
1	N-G	0.802127
1	N-G	0.813479
1	N-G	1.26201
1	N-G	0.3211
1	N-G	0.346493
1	N-G	0.0572632
1	N-G	0.155906
1	N-G	0.375848
1	N-G	0.172807
1	N-G	0.252411
1	N-G	0.141159
1	N-G	0.229624
1	G-N	1.11968
1	G-N	1.06019
1	G-N	0.079189
1	G-N	0.0396219
1	G-N	0.0274732
1	G-N	0.0888344
1	G-N	0.0939555
1	G-N	0.0945459
1	G-N	0.162489
1	G-N	0.131625
1	G-N	0.117445
1	G-N	0.236125
1	G-N	0.493067
1	G-N	0.421901
1	G-N	0.343623
1	G-N	0.170776
1	G-N	0.0358343
1	G-N	0.0607077
1	G-N	0.0459143
2	N-G	0.110231
2	N-G	0.125776
2	N-G	0.107945
2	N-G	0.067343
2	N-G	0.0748433
2	N-G	0.107945
2	N-G	0.0562484
2	N-G	0.0329251
2	N-G	0.243143
2	N-G	0.243143
2	N-G	0.164794
2	N-G	0.110178
2	N-G	0.158121
2	N-G	0.122588
2	N-G	0.109677
2	N-G	0.114516
2	N-G	0.112542
2	N-G	0.0837956
2	N-G	0.145795
2	N-G	0.0664348
2	G-N	1.73966
2	G-N	1.93607
2	G-N	1.28583
2	G-N	1.36715
2	G-N	2.09796
2	G-N	0.156693
2	G-N	0.147282
2	G-N	0.122026
2	G-N	0.104031
2	G-N	0.0437446
2	G-N	0.0348307
2	G-N	0.261422
2	G-N	0.221204
2	G-N	0.266223
2	G-N	0.206908
2	G-N	0.109478
2	G-N	0.192244
2	G-N	0.328222
2	G-N	0.143749
2	G-N	0.127578
3	N-G	0.300517
3	N-G	0.426244
3	N-G	0.527474
3	N-G	0.353354
3	N-G	0.384597
3	N-G	1.06562
3	N-G	0.683264
3	N-G	0.47885
3	N-G	0.658867
3	N-G	0.889593
3	N-G	0.312281
3	N-G	0.226252
3	N-G	0.213033
3	N-G	0.103708
3	N-G	0.286414
3	N-G	0.259139
3	N-G	0.274093
3	N-G	0.102431
3	N-G	0.215503
3	N-G	0.492985
3	N-G	0.308786
3	N-G	0.311271
3	N-G	0.474237
3	N-G	0.225284
3	N-G	0.20095
3	G-N	0.114899
3	G-N	0.140647
3	G-N	0.124389
3	G-N	0.11778
3	G-N	0.0720803
3	G-N	0.0926841
3	G-N	0.102644
3	G-N	0.157261
3	G-N	0.218974
3	G-N	0.108111
3	G-N	0.158045
3	G-N	0.218974
3	G-N	0.175347
3	G-N	0.176716
3	G-N	0.163032
3	G-N	0.252677
3	G-N	0.166365
3	G-N	0.118637
3	G-N	0.500019
3	G-N	0.472788
3	G-N	0.584109
3	G-N	0.101589
3	G-N	0.289205
3	G-N	0.112192
3	G-N	0.137614
