# Supplementary material for: The relative binding position of Nck and Grb2 adaptors impacts actin-based motility of Vaccinia virus
Source: eLife journal article supplement (doi:10.7554/elife.74655), 2022-07-07
Supplement: supp [file Fig6D_source data.xlsx]

## Sheet: Sheet1
replicate	condition	pY132 ab intensity
1	N-X	3447.5
1	N-X	7367
1	N-X	24430
1	N-X	19515
1	N-X	11729
1	N-X	9297
1	N-X	11190.5
1	N-X	18570
1	N-X	10121
1	N-X	6762
1	N-X	19414
1	N-X	17257
1	N-X	21766.5
1	N-X	20979.5
1	N-X	33093.5
1	N-X	16307
1	N-X	11737
1	N-X	26655
1	N-X	11271
1	N-X	35943
1	N-X	12738.5
1	N-X	-539
1	N-X	5242
1	N-X	5622
1	N-X	1041
1	N-X	21983
1	N-X	-2882
1	N-X	19942
1	N-X	5095
1	N-X	-1139
1	N-X	17768
2	N-X	7962.5
2	N-X	8097
2	N-X	1430.5
2	N-X	578.5
2	N-X	6350
2	N-X	-1120
2	N-X	13409.5
2	N-X	10115
2	N-X	16574
2	N-X	7090
2	N-X	-8
2	N-X	2693
2	N-X	21861
2	N-X	-1070
2	N-X	2605
2	N-X	22032
2	N-X	34423
2	N-X	10754
2	N-X	863
2	N-X	24240
2	N-X	17584
2	N-X	2429
2	N-X	4656
2	N-X	2477
2	N-X	-726
2	N-X	95
2	N-X	2214
2	N-X	8596
2	N-X	10333
2	N-X	-1579
2	N-X	217
3	N-X	11815.5
3	N-X	35737
3	N-X	12426
3	N-X	29193.5
3	N-X	13113.5
3	N-X	15017
3	N-X	18540
3	N-X	23869
3	N-X	15568
3	N-X	8888
3	N-X	24573
3	N-X	10716
3	N-X	15221
3	N-X	19002
3	N-X	52973
3	N-X	42394
3	N-X	27628
3	N-X	21919
3	N-X	14600
3	N-X	22670
3	N-X	51484
3	N-X	4494
3	N-X	5865
3	N-X	13617
3	N-X	59207
3	N-X	32199
3	N-X	-904
3	N-X	3631
3	N-X	-558
3	N-X	3298
1	N-G	22851.5
1	N-G	19744.5
1	N-G	33707
1	N-G	23903
1	N-G	14746
1	N-G	24602
1	N-G	32844.5
1	N-G	31605
1	N-G	27756
1	N-G	26094
1	N-G	24126
1	N-G	32166
1	N-G	28459
1	N-G	118110
1	N-G	22374
1	N-G	18252
1	N-G	35195
1	N-G	51174
1	N-G	41316
1	N-G	81346
1	N-G	49069
1	N-G	67811
1	N-G	46570
1	N-G	88801
1	N-G	51910
1	N-G	26518
1	N-G	32164
1	N-G	26116
1	N-G	11325
1	N-G	7764
2	N-G	29511
2	N-G	32410.5
2	N-G	30098.5
2	N-G	23515
2	N-G	33014
2	N-G	62133.5
2	N-G	68125
2	N-G	48624
2	N-G	58401
2	N-G	47750
2	N-G	34955
2	N-G	92893
2	N-G	74666
2	N-G	69801
2	N-G	84757
2	N-G	23453
2	N-G	29771
2	N-G	32016
2	N-G	43250
2	N-G	30305
2	N-G	53208
2	N-G	33544
2	N-G	38180
2	N-G	55943
2	N-G	41532
2	N-G	91231
2	N-G	35604
2	N-G	55121
2	N-G	38990
2	N-G	55114
2	N-G	36934
3	N-G	29740.5
3	N-G	15835.5
3	N-G	39293.5
3	N-G	42210.5
3	N-G	20784.5
3	N-G	30567
3	N-G	20912
3	N-G	38926
3	N-G	13545
3	N-G	14708
3	N-G	9829
3	N-G	31976
3	N-G	28890
3	N-G	15986
3	N-G	12472
3	N-G	57619
3	N-G	61978
3	N-G	38793
3	N-G	47432
3	N-G	29084
3	N-G	47017
3	N-G	45780
3	N-G	35398
3	N-G	20400
3	N-G	32700
3	N-G	34754
3	N-G	30674
3	N-G	44951
3	N-G	59902
3	N-G	45169
1	G-N	105001
1	G-N	134278
1	G-N	80482.5
1	G-N	66519.5
1	G-N	84955.5
1	G-N	141942
1	G-N	110113
1	G-N	133606
1	G-N	169245
1	G-N	42332
1	G-N	160112
1	G-N	132545
1	G-N	101005
1	G-N	109736
1	G-N	137476
1	G-N	83610
1	G-N	79997
1	G-N	74290
1	G-N	101762
1	G-N	109062
1	G-N	85514
1	G-N	87081
1	G-N	85686
1	G-N	76241
1	G-N	58409
1	G-N	85175
1	G-N	104879
2	G-N	83613.5
2	G-N	73828
2	G-N	79452
2	G-N	76647
2	G-N	103051
2	G-N	84297
2	G-N	135718
2	G-N	57724
2	G-N	36550
2	G-N	50536
2	G-N	94829
2	G-N	67490
2	G-N	52523
2	G-N	40517
2	G-N	105309
2	G-N	60174
2	G-N	50000
2	G-N	61465
2	G-N	51507
2	G-N	97106
2	G-N	43019
2	G-N	88482
2	G-N	82851
2	G-N	90863
2	G-N	117929
2	G-N	46835
2	G-N	55602
2	G-N	31457
2	G-N	71951
2	G-N	89167
3	G-N	81785.5
3	G-N	95746.5
3	G-N	74065.5
3	G-N	72783
3	G-N	76769.5
3	G-N	105591
3	G-N	95807.5
3	G-N	60148
3	G-N	98477
3	G-N	123664
3	G-N	87411
3	G-N	126900
3	G-N	81256
3	G-N	73428
3	G-N	92296
3	G-N	59077
3	G-N	68856
3	G-N	88109
3	G-N	116846
3	G-N	46114
3	G-N	141240
3	G-N	141782
3	G-N	122572
3	G-N	120273
3	G-N	101593
3	G-N	71072
3	G-N	126491
3	G-N	57784
3	G-N	55326
3	G-N	95786
