# Supplementary material for: The relative binding position of Nck and Grb2 adaptors impacts actin-based motility of Vaccinia virus
Source: eLife journal article supplement (doi:10.7554/elife.74655), 2022-07-07
Supplement: supp [file Fig7-suppl1A_source data.xlsx]

## Sheet: Sheet1
replicate	condition	actin tail number
1	N-G	18.0798
2	N-G	22.9614
3	N-G	28.8184
1	G-N	14.1553
2	G-N	19.6581
3	G-N	21.3213
1	G-N-G	14.1316
2	G-N-G	27.8369
3	G-N-G	16.4918
1	G-G-N	13.474
2	G-G-N	18.5379
3	G-G-N	16.5468
