# Supplementary material for: The relative binding position of Nck and Grb2 adaptors impacts actin-based motility of Vaccinia virus
Source: eLife journal article supplement (doi:10.7554/elife.74655), 2022-07-07
Supplement: supp [file Fig7-suppl1B_source data.xlsx]

## Sheet: Sheet1
replicate	condition	GFP Nck:RFP
2	N-G	0.0558813
2	N-G	0.0657671
2	N-G	0.0685746
2	N-G	0.114728
2	N-G	0.0446526
2	N-G	0.0430654
2	N-G	0.42323
2	N-G	0.191639
2	N-G	0.399382
2	N-G	0.430218
2	N-G	0.328311
2	N-G	0.131259
2	N-G	0.0603405
2	N-G	0.0684593
2	N-G	0.0879269
2	N-G	0.151173
2	N-G	0.110879
2	N-G	0.164055
2	N-G	0.0905075
2	N-G	0.0953525
2	N-G	0.054771
2	N-G	0.100997
2	N-G	0.0862163
2	N-G	0.0998827
2	N-G	0.0610603
2	N-G	0.0614759
2	N-G	0.0308167
2	G-N	0.145615
2	G-N	0.180834
2	G-N	0.161479
2	G-N	0.116449
2	G-N	0.144924
2	G-N	0.110702
2	G-N	0.281439
2	G-N	0.198413
2	G-N	0.0957757
2	G-N	0.10969
2	G-N	0.165107
2	G-N	0.173002
2	G-N	0.208449
2	G-N	0.234181
2	G-N	0.209428
2	G-N	0.251212
2	G-N	0.288842
2	G-N	0.107259
2	G-N	0.140877
2	G-N	0.0620801
2	G-N	0.0873782
2	G-N	0.0541026
2	G-N	0.123241
2	G-N	0.0987289
2	G-N	0.0987289
2	G-N	0.123241
2	G-N	0.114212
2	G-N	0.0987289
2	G-N	0.0865875
2	G-N	0.135727
2	G-N	0.0764611
2	G-N-G	0.245579
2	G-N-G	0.133594
2	G-N-G	0.171501
2	G-N-G	0.170087
2	G-N-G	0.228496
2	G-N-G	0.0489957
2	G-N-G	0.0332574
2	G-N-G	0.044397
2	G-N-G	0.0448455
2	G-N-G	0.033324
2	G-N-G	0.167348
2	G-N-G	0.138471
2	G-N-G	0.125216
2	G-N-G	0.101477
2	G-N-G	0.0597686
2	G-N-G	0.073435
2	G-N-G	0.0320065
2	G-N-G	0.039839
2	G-N-G	0.0326325
2	G-N-G	0.0338632
2	G-N-G	0.0830192
2	G-N-G	0.106234
2	G-N-G	0.0514913
2	G-N-G	0.130843
2	G-N-G	0.0750318
2	G-N-G	0.088401
2	G-N-G	0.0937618
2	G-N-G	0.0701978
2	G-N-G	0.088401
2	G-N-G	0.101172
2	G-G-N	0.0691817
2	G-G-N	0.0617205
2	G-G-N	0.060869
2	G-G-N	0.0508557
2	G-G-N	0.0425365
2	G-G-N	0.17396
2	G-G-N	0.191793
2	G-G-N	0.132171
2	G-G-N	0.161924
2	G-G-N	0.163758
2	G-G-N	0.0499973
2	G-G-N	0.0454836
2	G-G-N	0.0387884
2	G-G-N	0.0701256
2	G-G-N	0.0691759
2	G-G-N	0.0623946
2	G-G-N	0.130946
2	G-G-N	0.146936
2	G-G-N	0.0855212
2	G-G-N	0.140774
2	G-G-N	0.0520627
2	G-G-N	0.0511584
2	G-G-N	0.049637
2	G-G-N	0.0511584
1	N-G	0.252265
1	N-G	0.23191
1	N-G	0.259861
1	N-G	0.209387
1	N-G	0.28806
1	N-G	0.2455
1	N-G	0.15182
1	N-G	0.182167
1	N-G	0.126242
1	N-G	0.132882
1	N-G	0.194287
1	N-G	0.132882
1	N-G	0.120492
1	N-G	0.113834
1	N-G	0.0763892
1	N-G	0.110952
1	N-G	0.0733273
1	N-G	0.107457
1	N-G	0.155817
1	N-G	0.194044
1	N-G	0.170711
1	N-G	0.172315
1	N-G	0.194195
1	N-G	0.150578
1	N-G	0.190682
1	N-G	0.184269
1	N-G	0.168256
1	N-G	0.23786
1	N-G	0.218683
1	N-G	0.168717
1	G-N	0.189195
1	G-N	0.164875
1	G-N	0.113956
1	G-N	0.198364
1	G-N	0.189195
1	G-N	0.100886
1	G-N	0.115037
1	G-N	0.104025
1	G-N	0.11803
1	G-N	0.133181
1	G-N	0.163732
1	G-N	0.133082
1	G-N	0.329578
1	G-N	0.240977
1	G-N	0.229764
1	G-N	0.211622
1	G-N	0.255411
1	G-N	0.208703
1	G-N	0.163193
1	G-N	0.108147
1	G-N	0.146967
1	G-N	0.142913
1	G-N	0.161698
1	G-N	0.0719248
1	G-N	0.0399538
1	G-N	0.0437483
1	G-N	0.0603429
1	G-N	0.044943
1	G-N	0.0369542
1	G-N-G	0.0950599
1	G-N-G	0.105776
1	G-N-G	0.135989
1	G-N-G	0.234357
1	G-N-G	0.193389
1	G-N-G	0.176021
1	G-N-G	0.142562
1	G-N-G	0.11821
1	G-N-G	0.165116
1	G-N-G	0.0919378
1	G-N-G	0.151302
1	G-N-G	0.185719
1	G-N-G	0.213844
1	G-N-G	0.287289
1	G-N-G	0.176134
1	G-N-G	0.217481
1	G-N-G	0.147591
1	G-N-G	0.163254
1	G-N-G	0.0953942
1	G-N-G	0.110933
1	G-N-G	0.148787
1	G-N-G	0.117551
1	G-N-G	0.100851
1	G-N-G	0.0584844
1	G-N-G	0.09636
1	G-N-G	0.11629
1	G-N-G	0.0864669
1	G-G-N	0.109805
1	G-G-N	0.171448
1	G-G-N	0.143916
1	G-G-N	0.117242
1	G-G-N	0.148643
1	G-G-N	0.109998
1	G-G-N	0.0563475
1	G-G-N	0.0377274
1	G-G-N	0.0399264
1	G-G-N	0.0365982
1	G-G-N	0.0310766
1	G-G-N	0.0350678
1	G-G-N	0.24851
1	G-G-N	0.150908
1	G-G-N	0.0275205
1	G-G-N	0.0310357
1	G-G-N	0.0580287
1	G-G-N	0.0369403
1	G-G-N	0.0565071
1	G-G-N	0.0300015
1	G-G-N	0.0521129
1	G-G-N	0.0277527
1	G-G-N	0.0350855
1	G-G-N	0.0739019
1	G-G-N	0.0683827
1	G-G-N	0.0335238
3	N-G	0.0925766
3	N-G	0.0661083
3	N-G	0.0706087
3	N-G	0.0593721
3	N-G	0.0850881
3	N-G	0.111867
3	N-G	0.280648
3	N-G	0.303356
3	N-G	0.249837
3	N-G	0.319914
3	N-G	0.160183
3	N-G	0.455214
3	N-G	0.129933
3	N-G	0.164147
3	N-G	0.142166
3	N-G	0.259579
3	N-G	0.163395
3	N-G	0.190757
3	N-G	0.199542
3	N-G	0.169157
3	N-G	0.123253
3	N-G	0.118718
3	N-G	0.166203
3	N-G	0.178828
3	N-G	0.182821
3	N-G	0.181755
3	N-G	0.29891
3	N-G	0.152688
3	N-G	0.127282
3	N-G	0.238627
3	G-N	0.241263
3	G-N	0.191242
3	G-N	0.153392
3	G-N	0.139577
3	G-N	0.171139
3	G-N	0.225801
3	G-N	0.390851
3	G-N	0.389991
3	G-N	0.380481
3	G-N	0.405912
3	G-N	0.410659
3	G-N	0.321264
3	G-N	0.289026
3	G-N	0.17486
3	G-N	0.185704
3	G-N	0.298661
3	G-N	0.205357
3	G-N	0.247689
3	G-N	0.18386
3	G-N	0.130636
3	G-N	0.135181
3	G-N	0.162084
3	G-N	0.18386
3	G-N	0.168587
3	G-N	0.334693
3	G-N	0.231161
3	G-N	0.20559
3	G-N	0.27978
3	G-N	0.247253
3	G-N	0.226775
3	G-N-G	0.201203
3	G-N-G	0.227924
3	G-N-G	0.192708
3	G-N-G	0.156533
3	G-N-G	0.173394
3	G-N-G	0.152875
3	G-N-G	0.129265
3	G-N-G	0.129979
3	G-N-G	0.105109
3	G-N-G	0.11412
3	G-N-G	0.134264
3	G-N-G	0.178293
3	G-N-G	0.0948333
3	G-N-G	0.0635098
3	G-N-G	0.138881
3	G-N-G	0.091904
3	G-N-G	0.0683504
3	G-N-G	0.0723033
3	G-N-G	0.290301
3	G-N-G	0.138166
3	G-N-G	0.217603
3	G-N-G	0.338557
3	G-N-G	0.167608
3	G-N-G	0.139002
3	G-N-G	0.146925
3	G-N-G	0.118214
3	G-N-G	0.128693
3	G-N-G	0.124003
3	G-N-G	0.104338
3	G-N-G	0.0808369
3	G-G-N	0.259521
3	G-G-N	0.187961
3	G-G-N	0.219804
3	G-G-N	0.18918
3	G-G-N	0.190007
3	G-G-N	0.20656
3	G-G-N	0.292521
3	G-G-N	0.283522
3	G-G-N	0.231817
3	G-G-N	0.27126
3	G-G-N	0.25037
3	G-G-N	0.292521
3	G-G-N	0.242691
3	G-G-N	0.250423
3	G-G-N	0.386137
3	G-G-N	0.30392
3	G-G-N	0.21973
3	G-G-N	0.2887
3	G-G-N	0.144343
3	G-G-N	0.111316
3	G-G-N	0.108595
3	G-G-N	0.125624
3	G-G-N	0.111019
3	G-G-N	0.0812334
3	G-G-N	0.049846
3	G-G-N	0.165933
3	G-G-N	0.121149
3	G-G-N	0.156914
3	G-G-N	0.109837
3	G-G-N	0.101371
