# Supplementary material for: The relative binding position of Nck and Grb2 adaptors impacts actin-based motility of Vaccinia virus
Source: eLife journal article supplement (doi:10.7554/elife.74655), 2022-07-07
Supplement: supp [file Fig7-suppl1C_source data.xlsx]

## Sheet: Sheet1
replicate	condition	GFP Grb2/RFP
1	N-G	0.335208
1	N-G	0.26204
1	N-G	0.365222
1	N-G	0.427752
1	N-G	0.331618
1	N-G	0.396986
1	N-G	0.312755
1	N-G	0.419173
1	N-G	0.577227
1	N-G	0.469733
1	N-G	0.513161
1	N-G	0.403004
1	N-G	0.56302
1	N-G	0.611933
1	N-G	0.546732
1	N-G	0.246522
1	N-G	0.26083
1	N-G	0.25854
1	N-G	0.308786
1	N-G	0.419142
1	N-G	0.27697
1	N-G	0.404652
1	N-G	0.619343
1	N-G	0.716356
1	N-G	0.489341
1	N-G	0.396546
1	N-G	0.395604
1	N-G	0.433478
1	G-N	0.0635177
1	G-N	0.151567
1	G-N	0.230648
1	G-N	0.0864052
1	G-N	0.139913
1	G-N	0.134042
1	G-N	0.0622304
1	G-N	0.043959
1	G-N	0.0553686
1	G-N	0.0551678
1	G-N	0.0729132
1	G-N	0.0692958
1	G-N	0.110244
1	G-N	0.0730379
1	G-N	0.0594927
1	G-N	0.0517959
1	G-N	0.087956
1	G-N	0.132185
1	G-N	0.0887116
1	G-N	0.0684485
1	G-N	0.118606
1	G-N	0.124498
1	G-N	0.079558
1	G-N	0.065472
1	G-N	0.210811
1	G-N	0.271281
1	G-N	0.131258
1	G-N	0.113605
1	G-N	0.181656
1	G-N	0.172678
1	G-N-G	0.554811
1	G-N-G	0.553696
1	G-N-G	0.316445
1	G-N-G	0.291529
1	G-N-G	0.34581
1	G-N-G	0.405181
1	G-N-G	0.493412
1	G-N-G	0.452928
1	G-N-G	0.593436
1	G-N-G	0.384623
1	G-N-G	0.380361
1	G-N-G	0.447243
1	G-N-G	0.372433
1	G-N-G	0.257936
1	G-N-G	0.359661
1	G-N-G	0.307675
1	G-N-G	0.442336
1	G-N-G	0.282749
1	G-N-G	0.399763
1	G-N-G	0.685545
1	G-N-G	0.511461
1	G-N-G	0.60505
1	G-N-G	0.488171
1	G-N-G	0.317861
1	G-N-G	0.365426
1	G-N-G	0.49501
1	G-N-G	0.435177
1	G-N-G	0.467639
1	G-N-G	0.42219
1	G-N-G	0.53234
1	G-G-N	0.119629
1	G-G-N	0.16806
1	G-G-N	0.171101
1	G-G-N	0.0480092
1	G-G-N	0.0781585
1	G-G-N	0.0667635
1	G-G-N	0.147871
1	G-G-N	0.0789714
1	G-G-N	0.141046
1	G-G-N	0.0620007
1	G-G-N	0.0789714
1	G-G-N	0.127235
1	G-G-N	0.171022
1	G-G-N	0.123163
1	G-G-N	0.140865
1	G-G-N	0.0902725
1	G-G-N	0.0999763
1	G-G-N	0.0681909
1	G-G-N	0.0969565
1	G-G-N	0.0535956
1	G-G-N	0.112003
1	G-G-N	0.184372
1	G-G-N	0.0751742
1	G-G-N	0.137488
1	G-G-N	0.0516911
1	G-G-N	0.0733085
1	G-G-N	0.128218
1	G-G-N	0.0367534
1	G-G-N	0.0635761
1	G-G-N	0.0733085
2	N-G	0.372253
2	N-G	0.408149
2	N-G	0.371705
2	N-G	0.372253
2	N-G	0.453974
2	N-G	0.340268
2	N-G	0.246763
2	N-G	0.276388
2	N-G	0.317512
2	N-G	0.298904
2	N-G	0.184825
2	N-G	0.246763
2	N-G	0.445867
2	N-G	0.407683
2	N-G	0.357706
2	N-G	0.478162
2	N-G	0.377864
2	N-G	0.576989
2	N-G	0.403126
2	N-G	0.523079
2	N-G	0.579239
2	N-G	0.426104
2	N-G	0.469468
2	N-G	0.404923
2	N-G	0.2551
2	N-G	0.292078
2	N-G	0.240177
2	N-G	0.299558
2	N-G	0.194307
2	N-G	0.268134
2	G-N	0.06712
2	G-N	0.0497914
2	G-N	0.0693171
2	G-N	0.0207023
2	G-N	0.06712
2	G-N	0.0497914
2	G-N	0.0443369
2	G-N	0.0617606
2	G-N	0.0560697
2	G-N	0.0756872
2	G-N	0.0564443
2	G-N	0.09168
2	G-N	0.0596002
2	G-N	0.0450123
2	G-N	0.0752985
2	G-N	0.0885909
2	G-N	0.0559815
2	G-N	0.0309165
2	G-N	0.103237
2	G-N	0.0848248
2	G-N	0.0773051
2	G-N	0.0489929
2	G-N	0.10645
2	G-N	0.0855814
2	G-N	0.0928955
2	G-N	0.106434
2	G-N	0.0939811
2	G-N	0.0940399
2	G-N	0.117975
2	G-N	0.0787289
2	G-N-G	0.708104
2	G-N-G	1.10684
2	G-N-G	1.01162
2	G-N-G	0.929612
2	G-N-G	0.841784
2	G-N-G	0.830471
2	G-N-G	0.73723
2	G-N-G	0.685136
2	G-N-G	0.667862
2	G-N-G	0.614409
2	G-N-G	0.635101
2	G-N-G	0.746441
2	G-N-G	0.37077
2	G-N-G	0.411214
2	G-N-G	0.488148
2	G-N-G	0.379688
2	G-N-G	0.528001
2	G-N-G	0.435376
2	G-N-G	0.340745
2	G-N-G	0.289632
2	G-N-G	0.291535
2	G-N-G	0.460377
2	G-N-G	0.248554
2	G-N-G	0.348053
2	G-N-G	0.288342
2	G-N-G	0.290325
2	G-N-G	0.484056
2	G-N-G	0.320717
2	G-N-G	0.384778
2	G-N-G	0.444895
2	G-G-N	0.154239
2	G-G-N	0.129289
2	G-G-N	0.107668
2	G-G-N	0.0646091
2	G-G-N	0.103155
2	G-G-N	0.0535043
2	G-G-N	0.0548374
2	G-G-N	0.058742
2	G-G-N	0.0401606
2	G-G-N	0.0857476
2	G-G-N	0.0584277
2	G-G-N	0.0667694
2	G-G-N	0.107743
2	G-G-N	0.0757931
2	G-G-N	0.0365529
2	G-G-N	0.0384337
2	G-G-N	0.0344462
2	G-G-N	0.0268865
2	G-G-N	0.0213353
2	G-G-N	0.0566179
2	G-G-N	0.0738624
2	G-G-N	0.0449416
2	G-G-N	0.0651252
2	G-G-N	0.0586182
2	G-G-N	0.0469268
2	G-G-N	0.0489244
2	G-G-N	0.0469268
2	G-G-N	0.046934
2	G-G-N	0.0313988
2	G-G-N	0.0325984
3	N-G	0.368996
3	N-G	0.521247
3	N-G	0.423053
3	N-G	0.315409
3	N-G	0.415328
3	N-G	0.631132
3	N-G	0.768158
3	N-G	0.707189
3	N-G	0.554062
3	N-G	0.423654
3	N-G	0.497612
3	N-G	0.586646
3	N-G	0.439375
3	N-G	0.329176
3	N-G	0.327753
3	N-G	0.404701
3	N-G	0.293722
3	N-G	0.528278
3	N-G	0.448639
3	N-G	0.405902
3	N-G	0.521385
3	N-G	0.276828
3	N-G	0.356555
3	N-G	0.428709
3	N-G	0.566973
3	N-G	0.602227
3	N-G	0.506543
3	N-G	0.632931
3	N-G	0.715207
3	N-G	0.316803
3	G-N	0.0702144
3	G-N	0.0785504
3	G-N	0.0962775
3	G-N	0.144918
3	G-N	0.0775498
3	G-N	0.0589951
3	G-N	0.0538708
3	G-N	0.0624673
3	G-N	0.0709032
3	G-N	0.0755138
3	G-N	0.0773728
3	G-N	0.0570126
3	G-N	0.0536554
3	G-N	0.132833
3	G-N	0.108322
3	G-N	0.114955
3	G-N	0.0959171
3	G-N	0.0634802
3	G-N	0.0976154
3	G-N	0.0868543
3	G-N	0.0758999
3	G-N	0.0791741
3	G-N	0.0898815
3	G-N	0.0838153
3	G-N	0.115443
3	G-N	0.0844227
3	G-N	0.0493906
3	G-N	0.0729981
3	G-N	0.07254
3	G-N	0.124498
3	G-N-G	0.961857
3	G-N-G	0.937441
3	G-N-G	0.769244
3	G-N-G	0.908772
3	G-N-G	0.798193
3	G-N-G	0.775989
3	G-N-G	1.74531
3	G-N-G	0.882986
3	G-N-G	0.658575
3	G-N-G	0.820536
3	G-N-G	0.851327
3	G-N-G	0.519391
3	G-N-G	0.352622
3	G-N-G	0.486604
3	G-N-G	0.395313
3	G-N-G	0.541714
3	G-N-G	0.724358
3	G-N-G	0.359768
3	G-N-G	0.642629
3	G-N-G	0.911484
3	G-N-G	0.54049
3	G-N-G	0.698791
3	G-N-G	0.657958
3	G-N-G	0.798002
3	G-N-G	0.484448
3	G-N-G	0.405805
3	G-N-G	0.517672
3	G-N-G	0.359008
3	G-N-G	0.457366
3	G-N-G	0.699814
3	G-G-N	0.103859
3	G-G-N	0.0365076
3	G-G-N	0.0368163
3	G-G-N	0.10407
3	G-G-N	0.111911
3	G-G-N	0.0563875
3	G-G-N	0.102145
3	G-G-N	0.116748
3	G-G-N	0.0646704
3	G-G-N	0.198044
3	G-G-N	0.027735
3	G-G-N	0.0941856
3	G-G-N	0.11999
3	G-G-N	0.141305
3	G-G-N	0.0740393
3	G-G-N	0.157396
3	G-G-N	0.120913
3	G-G-N	0.0546536
3	G-G-N	0.0738144
3	G-G-N	0.0700372
3	G-G-N	0.0811732
3	G-G-N	0.0599589
3	G-G-N	0.0634304
3	G-G-N	0.0502173
3	G-G-N	0.159087
3	G-G-N	0.0811365
3	G-G-N	0.065785
3	G-G-N	0.181605
3	G-G-N	0.080273
3	G-G-N	0.173084
