# Supplementary material for: The relative binding position of Nck and Grb2 adaptors impacts actin-based motility of Vaccinia virus
Source: eLife journal article supplement (doi:10.7554/elife.74655), 2022-07-07
Supplement: supp [file Fig7-suppl2A_source data.xlsx]

## Sheet: Sheet1
replicate	condition	plaque size
1	orig	1.61012
1	orig	1.42662
1	orig	1.02799
1	orig	1.6285
1	orig	1.43938
1	orig	1.53662
1	orig	1.66116
1	orig	1.40876
1	orig	1.12292
1	orig	1.6017
2	orig	0.992001
2	orig	1.36103
2	orig	1.15151
2	orig	1.14844
2	orig	1.21812
2	orig	1.01471
2	orig	0.766906
2	orig	0.818203
3	orig	1.56852
3	orig	1.53356
3	orig	1.45623
3	orig	1.56852
3	orig	1.27886
3	orig	1.36384
3	orig	1.30132
3	orig	1.42611
3	orig	1.44066
3	orig	1.39651
1	backup	1.40289
1	backup	1.55755
1	backup	1.39523
1	backup	1.48558
1	backup	1.46363
1	backup	1.53356
1	backup	1.53356
1	backup	1.72726
1	backup	1.53356
1	backup	1.65453
2	backup	1.03488
2	backup	0.786302
2	backup	1.02748
2	backup	0.986642
2	backup	0.734239
2	backup	1.02441
3	backup	1.6142
3	backup	1.28728
3	backup	1.20306
3	backup	1.50497
3	backup	1.2957
3	backup	1.56852
3	backup	1.15712
3	backup	1.61956
3	backup	1.45623
3	backup	1.2342
