# Supplementary material for: The relative binding position of Nck and Grb2 adaptors impacts actin-based motility of Vaccinia virus
Source: eLife journal article supplement (doi:10.7554/elife.74655), 2022-07-07
Supplement: supp [file Fig7-suppl2B_source data.xlsx]

## Sheet: Sheet1
replicate	condition	plaque size
1	orig	1.40289
1	orig	1.58919
1	orig	1.06601
1	orig	1.03845
1	orig	1.02441
1	orig	1.40825
1	orig	1.23853
1	orig	1.46363
1	orig	1.21812
1	orig	1.28728
2	orig	1.49349
2	orig	1.45368
2	orig	1.38018
2	orig	1.38018
2	orig	1.38885
2	orig	1.39319
2	orig	1.42152
2	orig	1.3322
2	orig	1.37175
2	orig	1.44628
3	orig	1.01114
3	orig	0.78426
3	orig	0.939683
3	orig	0.951168
3	orig	1.23853
3	orig	1.01216
3	orig	1.21812
3	orig	1.32403
3	orig	1.18035
3	orig	1.07188
1	backup	1.48813
1	backup	1.21812
1	backup	1.30208
1	backup	1.54121
1	backup	1.37431
1	backup	1.23853
1	backup	1.50753
1	backup	1.77626
1	backup	1.45368
1	backup	1.50753
2	backup	1.40289
2	backup	1.40289
2	backup	1.55244
2	backup	1.1413
2	backup	1.36103
2	backup	1.39523
2	backup	1.38477
2	backup	1.44857
2	backup	1.13492
2	backup	1.56393
3	backup	1.32888
3	backup	1.56393
3	backup	1.29851
3	backup	1.11884
3	backup	1.02799
3	backup	1.02441
3	backup	0.992001
3	backup	0.992001
3	backup	1.42611
3	backup	1.28141
