# Supplementary material for: The relative binding position of Nck and Grb2 adaptors impacts actin-based motility of Vaccinia virus
Source: eLife journal article supplement (doi:10.7554/elife.74655), 2022-07-07
Supplement: supp [file Fig7B_source data.xlsx]

## Sheet: Sheet1
replicate	condition	actin tail length
1	N-G	4.03288
1	N-G	3.009
1	N-G	3.25788
1	N-G	6.56023
1	N-G	3.28573
1	N-G	4.75708
1	N-G	6.12877
1	N-G	6.87307
1	N-G	2.91159
1	N-G	1.8817
1	N-G	3.01145
1	N-G	4.82491
1	N-G	3.69271
1	N-G	3.36692
1	N-G	5.48678
1	N-G	2.77981
1	N-G	4.15313
1	N-G	4.13457
1	N-G	3.7283
1	N-G	4.61142
1	N-G	2.55847
1	N-G	3.62998
1	N-G	3.82571
1	N-G	2.22156
1	N-G	1.80285
1	N-G	3.85274
1	N-G	0.885156
1	N-G	1.41474
1	N-G	1.23899
1	N-G	6.36154
1	N-G	3.74371
1	N-G	2.26664
1	N-G	2.22809
1	N-G	5.04268
1	N-G	3.84265
1	N-G	3.43689
1	N-G	2.68607
1	N-G	4.16966
1	N-G	3.32928
1	N-G	5.92365
1	N-G	6.54208
1	N-G	4.96036
1	N-G	7.41142
1	N-G	3.60917
1	N-G	4.28298
1	N-G	3.31888
1	N-G	4.8503
1	N-G	4.04155
1	N-G	6.09634
1	N-G	3.59693
1	N-G	4.47046
1	N-G	3.85244
1	N-G	5.04145
1	N-G	3.06102
1	N-G	2.62813
1	N-G	3.5902
1	N-G	2.22146
1	N-G	2.27807
1	N-G	2.50308
1	N-G	1.32926
1	N-G	5.04594
1	N-G	6.2934
1	N-G	5.37183
1	N-G	7.99282
1	N-G	7.26413
1	N-G	3.21453
1	N-G	5.36316
2	N-G	5.88142
2	N-G	4.46097
2	N-G	5.18435
2	N-G	4.62815
2	N-G	5.38203
2	N-G	3.3456
2	N-G	4.04552
2	N-G	3.55572
2	N-G	3.47412
2	N-G	4.00411
2	N-G	4.93466
2	N-G	6.69242
2	N-G	4.92507
2	N-G	4.66405
2	N-G	5.36173
2	N-G	2.69963
2	N-G	3.23381
2	N-G	4.20413
2	N-G	4.28635
2	N-G	3.22534
2	N-G	4.67303
2	N-G	4.90334
2	N-G	4.77431
2	N-G	2.80143
2	N-G	7.70763
2	N-G	6.36398
2	N-G	3.49666
2	N-G	3.84581
2	N-G	3.45831
2	N-G	3.67659
2	N-G	2.49574
2	N-G	3.79032
2	N-G	3.48871
2	N-G	2.0196
2	N-G	5.63907
2	N-G	3.23238
2	N-G	3.10498
2	N-G	2.97738
2	N-G	3.81398
2	N-G	3.42659
2	N-G	2.94474
2	N-G	3.32081
2	N-G	2.98656
2	N-G	3.4119
2	N-G	2.59957
2	N-G	2.88742
2	N-G	3.49544
2	N-G	1.82713
2	N-G	2.27674
2	N-G	3.98116
2	N-G	5.75096
2	N-G	5.23984
2	N-G	2.50471
2	N-G	3.07601
2	N-G	3.662
2	N-G	3.95668
2	N-G	2.76083
2	N-G	2.1932
2	N-G	3.63069
2	N-G	5.82359
2	N-G	4.63162
2	N-G	5.92753
2	N-G	3.87427
3	N-G	4.60571
3	N-G	3.72535
3	N-G	3.60019
3	N-G	3.24737
3	N-G	2.44851
3	N-G	2.86222
3	N-G	3.08958
3	N-G	5.99342
3	N-G	5.14825
3	N-G	3.22228
3	N-G	3.41608
3	N-G	3.24727
3	N-G	3.30735
3	N-G	4.03206
3	N-G	1.95962
3	N-G	2.18107
3	N-G	3.15404
3	N-G	2.90261
3	N-G	3.18454
3	N-G	2.02868
3	N-G	5.12244
3	N-G	3.74993
3	N-G	2.8661
3	N-G	3.06979
3	N-G	2.26868
3	N-G	5.59796
3	N-G	3.58163
3	N-G	3.06887
3	N-G	1.47533
3	N-G	3.8503
3	N-G	3.62488
3	N-G	3.14803
3	N-G	4.55879
3	N-G	3.18209
3	N-G	5.17711
3	N-G	3.52808
3	N-G	2.42678
3	N-G	2.18137
3	N-G	3.15119
3	N-G	4.7173
3	N-G	1.79469
3	N-G	3.98973
3	N-G	3.81806
3	N-G	2.38415
3	N-G	3.38589
3	N-G	4.53472
3	N-G	4.10836
3	N-G	3.92272
3	N-G	4.32439
3	N-G	3.65752
3	N-G	4.10825
3	N-G	2.18759
3	N-G	2.27684
3	N-G	4.10428
3	N-G	3.9016
3	N-G	4.1259
3	N-G	1.68677
3	N-G	4.84969
3	N-G	3.59224
3	N-G	5.68987
3	N-G	2.6008
3	N-G	6.41356
3	N-G	2.72289
3	N-G	2.3509
3	N-G	3.61529
3	N-G	2.95525
3	N-G	2.58845
1	G-N	2.92516
1	G-N	1.63904
1	G-N	1.34487
1	G-N	1.62272
1	G-N	1.73145
1	G-N	4.08989
1	G-N	3.13405
1	G-N	2.30377
1	G-N	1.938
1	G-N	2.1524
1	G-N	3.33571
1	G-N	4.74932
1	G-N	2.80051
1	G-N	3.18128
1	G-N	3.07367
1	G-N	3.03226
1	G-N	2.15424
1	G-N	2.142
1	G-N	1.428
1	G-N	1.60681
1	G-N	1.632
1	G-N	1.99237
1	G-N	1.81733
1	G-N	2.47901
1	G-N	2.5499
1	G-N	1.13699
1	G-N	2.36813
1	G-N	1.65607
1	G-N	2.38466
1	G-N	1.4839
1	G-N	1.31305
1	G-N	1.836
1	G-N	1.96768
1	G-N	1.44095
1	G-N	2.11742
1	G-N	4.27727
1	G-N	4.1869
1	G-N	3.66364
1	G-N	3.61814
1	G-N	2.49859
1	G-N	1.64975
1	G-N	2.34743
1	G-N	0.976038
1	G-N	1.19901
1	G-N	4.29828
1	G-N	3.64099
1	G-N	3.88957
1	G-N	1.86793
1	G-N	2.25583
1	G-N	1.92443
1	G-N	2.19575
1	G-N	3.58693
1	G-N	3.11773
1	G-N	2.28837
1	G-N	1.19136
1	G-N	1.51439
1	G-N	1.92525
1	G-N	1.03102
1	G-N	1.22818
1	G-N	3.25166
1	G-N	2.18249
1	G-N	1.52306
1	G-N	2.25634
1	G-N	1.89496
1	G-N	0.914226
1	G-N	2.18902
2	G-N	3.20423
2	G-N	1.78408
2	G-N	2.24012
2	G-N	1.88618
2	G-N	1.83029
2	G-N	1.76327
2	G-N	1.37935
2	G-N	2.20718
2	G-N	1.61721
2	G-N	1.94279
2	G-N	1.46084
2	G-N	1.53847
2	G-N	2.77807
2	G-N	3.32846
2	G-N	2.82163
2	G-N	2.71269
2	G-N	2.13068
2	G-N	2.0247
2	G-N	1.57437
2	G-N	3.44332
2	G-N	2.18606
2	G-N	2.69035
2	G-N	2.88007
2	G-N	2.87477
2	G-N	1.93208
2	G-N	2.9986
2	G-N	2.60437
2	G-N	1.94647
2	G-N	2.26103
2	G-N	1.53275
2	G-N	1.91403
2	G-N	1.97809
2	G-N	2.81398
2	G-N	2.33733
2	G-N	1.224
2	G-N	3.1775
2	G-N	1.91168
2	G-N	1.04509
2	G-N	1.7493
2	G-N	1.23196
2	G-N	1.35762
2	G-N	1.44452
2	G-N	1.50736
2	G-N	1.52837
2	G-N	1.47808
2	G-N	2.07233
2	G-N	3.57724
2	G-N	2.13404
2	G-N	2.27195
2	G-N	1.30336
2	G-N	1.72594
2	G-N	2.19392
2	G-N	3.34601
2	G-N	2.1575
2	G-N	1.02326
2	G-N	2.54398
2	G-N	2.14894
2	G-N	1.48349
2	G-N	2.7334
2	G-N	1.85752
2	G-N	1.54357
2	G-N	2.05469
2	G-N	1.35007
3	G-N	2.43311
3	G-N	1.63516
3	G-N	1.00868
3	G-N	0.974814
3	G-N	1.19422
3	G-N	0.816
3	G-N	1.05284
3	G-N	1.29071
3	G-N	0.976038
3	G-N	0.738072
3	G-N	0.942072
3	G-N	1.71533
3	G-N	2.3309
3	G-N	0.984096
3	G-N	0.973284
3	G-N	1.38455
3	G-N	1.59467
3	G-N	1.37414
3	G-N	1.9582
3	G-N	0.714
3	G-N	1.01011
3	G-N	1.44595
3	G-N	0.992154
3	G-N	1.5607
3	G-N	1.13618
3	G-N	1.50256
3	G-N	2.19728
3	G-N	1.14607
3	G-N	2.53592
3	G-N	2.4073
3	G-N	0.918
3	G-N	1.34069
3	G-N	0.907086
3	G-N	1.47716
3	G-N	1.27347
3	G-N	1.80815
3	G-N	1.49828
3	G-N	1.59936
3	G-N	1.94871
3	G-N	1.73023
3	G-N	2.32448
3	G-N	2.22472
3	G-N	1.2443
3	G-N	0.940134
3	G-N	1.97207
3	G-N	1.78765
3	G-N	1.11425
3	G-N	1.68749
3	G-N	1.50746
3	G-N	1.78408
3	G-N	0.972774
3	G-N	0.833238
3	G-N	0.848538
3	G-N	2.68617
3	G-N	1.82345
3	G-N	2.20871
3	G-N	1.42331
3	G-N	1.70881
3	G-N	1.35803
3	G-N	1.27918
3	G-N	1.428
3	G-N	1.77745
3	G-N	1.75736
3	G-N	1.92219
3	G-N	1.48328
3	G-N	1.44106
3	G-N	0.654636
3	G-N	1.02
1	G-N-G	3.78083
1	G-N-G	2.59519
1	G-N-G	3.50635
1	G-N-G	1.93769
1	G-N-G	2.75114
1	G-N-G	2.24624
1	G-N-G	2.97871
1	G-N-G	2.66322
1	G-N-G	1.96248
1	G-N-G	2.04
1	G-N-G	2.75216
1	G-N-G	2.17097
1	G-N-G	2.5655
1	G-N-G	2.86426
1	G-N-G	2.75043
1	G-N-G	2.75165
1	G-N-G	2.02113
1	G-N-G	2.49329
1	G-N-G	4.12712
1	G-N-G	2.77879
1	G-N-G	2.88303
1	G-N-G	2.12078
1	G-N-G	1.64189
1	G-N-G	4.13824
1	G-N-G	2.91567
1	G-N-G	4.92762
1	G-N-G	3.33805
1	G-N-G	3.23391
1	G-N-G	1.88404
1	G-N-G	2.244
1	G-N-G	3.22748
1	G-N-G	3.14925
1	G-N-G	2.84845
1	G-N-G	2.3665
1	G-N-G	2.76277
1	G-N-G	2.76563
1	G-N-G	4.19546
1	G-N-G	3.7995
1	G-N-G	2.61763
1	G-N-G	2.25165
1	G-N-G	2.28409
1	G-N-G	3.57306
1	G-N-G	3.42526
1	G-N-G	3.49381
1	G-N-G	2.09916
1	G-N-G	2.10314
1	G-N-G	2.22156
1	G-N-G	2.6213
1	G-N-G	2.20198
1	G-N-G	1.90822
1	G-N-G	3.50809
1	G-N-G	3.12712
1	G-N-G	1.22461
1	G-N-G	0.996336
1	G-N-G	2.26889
1	G-N-G	2.1778
1	G-N-G	2.01991
1	G-N-G	1.58477
1	G-N-G	2.08692
1	G-N-G	3.73657
1	G-N-G	1.41515
1	G-N-G	3.16322
1	G-N-G	2.92597
1	G-N-G	3.92618
1	G-N-G	3.89487
1	G-N-G	4.25615
1	G-N-G	2.95076
1	G-N-G	1.17657
2	G-N-G	2.59774
2	G-N-G	4.07164
2	G-N-G	2.84488
2	G-N-G	2.45881
2	G-N-G	1.51235
2	G-N-G	2.15648
2	G-N-G	1.5046
2	G-N-G	1.739
2	G-N-G	4.00625
2	G-N-G	2.36008
2	G-N-G	2.17903
2	G-N-G	1.48104
2	G-N-G	3.69923
2	G-N-G	3.00431
2	G-N-G	2.48972
2	G-N-G	3.59356
2	G-N-G	1.83682
2	G-N-G	3.45698
2	G-N-G	2.53868
2	G-N-G	2.91577
2	G-N-G	1.86558
2	G-N-G	1.73431
2	G-N-G	3.32265
2	G-N-G	2.44657
2	G-N-G	3.13426
2	G-N-G	2.62946
2	G-N-G	1.06417
2	G-N-G	3.77798
2	G-N-G	2.53847
2	G-N-G	3.71657
2	G-N-G	2.21167
2	G-N-G	1.2497
2	G-N-G	4.98372
2	G-N-G	2.69851
2	G-N-G	1.08181
2	G-N-G	2.96647
2	G-N-G	2.50624
2	G-N-G	2.19473
2	G-N-G	2.52256
2	G-N-G	1.49461
2	G-N-G	3.08336
2	G-N-G	2.95831
2	G-N-G	1.55713
2	G-N-G	2.02735
2	G-N-G	2.05122
2	G-N-G	1.39128
2	G-N-G	2.13639
2	G-N-G	3.76145
2	G-N-G	2.23319
2	G-N-G	5.39549
2	G-N-G	3.98718
2	G-N-G	3.99259
2	G-N-G	4.8146
2	G-N-G	3.0804
2	G-N-G	2.38445
2	G-N-G	2.63833
2	G-N-G	4.63111
2	G-N-G	4.31776
2	G-N-G	4.09102
2	G-N-G	4.3297
2	G-N-G	2.18953
2	G-N-G	2.90017
2	G-N-G	3.10549
2	G-N-G	3.43934
2	G-N-G	2.97758
2	G-N-G	3.65344
2	G-N-G	4.73525
3	G-N-G	4.74433
3	G-N-G	2.17403
3	G-N-G	3.00778
3	G-N-G	1.4944
3	G-N-G	3.58469
3	G-N-G	1.938
3	G-N-G	3.7944
3	G-N-G	2.73584
3	G-N-G	3.11049
3	G-N-G	2.77471
3	G-N-G	1.36802
3	G-N-G	4.52676
3	G-N-G	2.51267
3	G-N-G	1.44177
3	G-N-G	1.48879
3	G-N-G	2.97952
3	G-N-G	2.84692
3	G-N-G	2.18923
3	G-N-G	4.02176
3	G-N-G	0.89454
3	G-N-G	0.90066
3	G-N-G	1.74267
3	G-N-G	1.57488
3	G-N-G	3.78604
3	G-N-G	3.33448
3	G-N-G	2.02715
3	G-N-G	2.71646
3	G-N-G	1.75899
3	G-N-G	3.25808
3	G-N-G	1.91148
3	G-N-G	1.04213
3	G-N-G	1.26276
3	G-N-G	4.41221
3	G-N-G	1.06233
3	G-N-G	2.47911
3	G-N-G	2.4835
3	G-N-G	2.81428
3	G-N-G	0.878016
3	G-N-G	2.52215
3	G-N-G	4.03889
3	G-N-G	4.06164
3	G-N-G	2.35579
3	G-N-G	2.46024
3	G-N-G	1.91383
3	G-N-G	2.95096
3	G-N-G	3.00727
3	G-N-G	3.79756
3	G-N-G	1.66811
3	G-N-G	4.97495
3	G-N-G	3.35264
3	G-N-G	2.49757
3	G-N-G	1.16831
3	G-N-G	4.12784
3	G-N-G	1.60415
3	G-N-G	0.731952
3	G-N-G	1.45564
3	G-N-G	1.46982
3	G-N-G	0.612
3	G-N-G	1.32314
3	G-N-G	1.00501
3	G-N-G	2.73799
3	G-N-G	1.34915
3	G-N-G	1.55652
3	G-N-G	1.58008
3	G-N-G	1.82509
3	G-N-G	2.88966
3	G-N-G	1.60222
3	G-N-G	2.56204
1	G-G-N	1.75236
1	G-G-N	2.25012
1	G-G-N	1.61395
1	G-G-N	1.67504
1	G-G-N	1.53326
1	G-G-N	1.01011
1	G-G-N	0.816
1	G-G-N	0.964308
1	G-G-N	0.762144
1	G-G-N	0.918
1	G-G-N	2.28296
1	G-G-N	1.52918
1	G-G-N	1.26296
1	G-G-N	2.68076
1	G-G-N	1.35007
1	G-G-N	2.73707
1	G-G-N	1.33426
1	G-G-N	1.9939
1	G-G-N	1.29815
1	G-G-N	1.45013
1	G-G-N	2.8662
1	G-G-N	2.49584
1	G-G-N	2.15679
1	G-G-N	0.993888
1	G-G-N	2.23339
1	G-G-N	2.79949
1	G-G-N	1.54785
1	G-G-N	3.12803
1	G-G-N	1.73278
1	G-G-N	2.11762
1	G-G-N	2.12211
1	G-G-N	1.78765
1	G-G-N	1.2901
1	G-G-N	1.40015
1	G-G-N	1.37231
1	G-G-N	1.46809
1	G-G-N	3.18413
1	G-G-N	3.57714
1	G-G-N	3.51502
1	G-G-N	2.25247
1	G-G-N	1.95452
1	G-G-N	1.63241
1	G-G-N	1.32926
1	G-G-N	1.37608
1	G-G-N	1.58008
1	G-G-N	1.49614
1	G-G-N	2.58254
1	G-G-N	1.47727
1	G-G-N	2.49869
1	G-G-N	1.326
1	G-G-N	1.78551
1	G-G-N	2.77746
1	G-G-N	2.1266
1	G-G-N	2.05091
1	G-G-N	2.4019
1	G-G-N	3.91843
1	G-G-N	1.96115
1	G-G-N	1.224
1	G-G-N	2.31244
1	G-G-N	1.3618
1	G-G-N	2.31673
1	G-G-N	2.64068
1	G-G-N	2.42138
1	G-G-N	1.56162
1	G-G-N	1.23757
1	G-G-N	1.96676
2	G-G-N	1.76837
2	G-G-N	1.63394
2	G-G-N	1.95738
2	G-G-N	1.12271
2	G-G-N	1.64801
2	G-G-N	1.224
2	G-G-N	1.75522
2	G-G-N	1.21084
2	G-G-N	1.20952
2	G-G-N	1.21421
2	G-G-N	0.942072
2	G-G-N	2.23992
2	G-G-N	2.21911
2	G-G-N	2.06417
2	G-G-N	1.37629
2	G-G-N	1.52908
2	G-G-N	1.54285
2	G-G-N	0.963696
2	G-G-N	1.65413
2	G-G-N	1.70952
2	G-G-N	0.762144
2	G-G-N	1.3364
2	G-G-N	0.922692
2	G-G-N	1.2034
2	G-G-N	2.34549
2	G-G-N	2.24135
2	G-G-N	2.53827
2	G-G-N	3.05521
2	G-G-N	2.46452
2	G-G-N	3.36784
2	G-G-N	1.19024
2	G-G-N	1.50022
2	G-G-N	1.21747
2	G-G-N	1.31988
2	G-G-N	0.976038
2	G-G-N	1.03652
2	G-G-N	2.35712
2	G-G-N	1.8001
2	G-G-N	1.2546
2	G-G-N	1.74328
2	G-G-N	1.70034
2	G-G-N	1.31804
2	G-G-N	1.27378
2	G-G-N	0.984708
2	G-G-N	1.68892
2	G-G-N	0.964308
2	G-G-N	0.979812
2	G-G-N	0.978996
2	G-G-N	1.64801
2	G-G-N	1.25613
2	G-G-N	1.17912
2	G-G-N	0.918
2	G-G-N	1.27622
2	G-G-N	0.914226
2	G-G-N	0.866286
2	G-G-N	1.22777
2	G-G-N	1.37129
2	G-G-N	1.27408
2	G-G-N	1.91158
2	G-G-N	2.01878
2	G-G-N	1.30142
2	G-G-N	1.70707
2	G-G-N	2.04581
2	G-G-N	2.37007
2	G-G-N	1.97084
2	G-G-N	2.31907
2	G-G-N	1.45044
2	G-G-N	2.21707
3	G-G-N	2.61824
3	G-G-N	2.53072
3	G-G-N	1.95391
3	G-G-N	1.37506
3	G-G-N	1.34813
3	G-G-N	3.6974
3	G-G-N	2.10824
3	G-G-N	1.91291
3	G-G-N	3.15986
3	G-G-N	1.91536
3	G-G-N	1.98747
3	G-G-N	1.89455
3	G-G-N	1.25654
3	G-G-N	2.4176
3	G-G-N	1.02
3	G-G-N	2.14078
3	G-G-N	1.50011
3	G-G-N	1.55591
3	G-G-N	1.535
3	G-G-N	1.86568
3	G-G-N	1.46462
3	G-G-N	1.10619
3	G-G-N	0.890154
3	G-G-N	0.763062
3	G-G-N	1.07528
3	G-G-N	0.714
3	G-G-N	1.8154
3	G-G-N	1.13475
3	G-G-N	2.1881
3	G-G-N	1.55734
3	G-G-N	3.91537
3	G-G-N	1.17504
3	G-G-N	1.93953
3	G-G-N	1.72288
3	G-G-N	2.7131
3	G-G-N	1.53326
3	G-G-N	1.72645
3	G-G-N	1.42749
3	G-G-N	1.75562
3	G-G-N	1.11486
3	G-G-N	0.756024
3	G-G-N	0.539274
3	G-G-N	0.857004
3	G-G-N	1.433
3	G-G-N	1.28602
3	G-G-N	1.15107
3	G-G-N	1.63455
3	G-G-N	1.25317
3	G-G-N	1.04407
3	G-G-N	2.20187
3	G-G-N	1.54173
3	G-G-N	1.30795
3	G-G-N	1.08661
3	G-G-N	0.934524
3	G-G-N	1.04978
3	G-G-N	1.71921
