# Supplementary material for: The relative binding position of Nck and Grb2 adaptors impacts actin-based motility of Vaccinia virus
Source: eLife journal article supplement (doi:10.7554/elife.74655), 2022-07-07
Supplement: supp [file Fig7C_source data.xlsx]

## Sheet: Sheet1
replicate	condition	virus speed
1	N-G	0.246
1	N-G	0.229
1	N-G	0.27
1	N-G	0.275
1	N-G	0.274
1	N-G	0.283
1	N-G	0.239
1	N-G	0.257
1	N-G	0.245
1	N-G	0.248
1	N-G	0.197
1	N-G	0.305
1	N-G	0.266
1	N-G	0.198
1	N-G	0.207
1	N-G	0.095
1	N-G	0.143
1	N-G	0.125
1	N-G	0.145
1	N-G	0.183
1	N-G	0.246
1	N-G	0.237
1	N-G	0.228
1	N-G	0.248
1	N-G	0.23
1	N-G	0.219
1	N-G	0.438
1	N-G	0.271
1	N-G	0.086
1	N-G	0.074
1	N-G	0.142
1	G-N	0.104
1	G-N	0.155
1	G-N	0.167
1	G-N	0.114
1	G-N	0.144
1	G-N	0.131
1	G-N	0.12
1	G-N	0.129
1	G-N	0.127
1	G-N	0.109
1	G-N	0.174
1	G-N	0.129
1	G-N	0.171
1	G-N	0.138
1	G-N	0.138
1	G-N	0.121
1	G-N	0.105
1	G-N	0.146
1	G-N	0.146
1	G-N	0.115
1	G-N	0.116
1	G-N	0.12
1	G-N	0.143
1	G-N	0.131
1	G-N	0.118
1	G-N-G	0.124
1	G-N-G	0.119
1	G-N-G	0.16
1	G-N-G	0.082
1	G-N-G	0.157
1	G-N-G	0.173
1	G-N-G	0.068
1	G-N-G	0.203
1	G-N-G	0.091
1	G-N-G	0.092
1	G-N-G	0.14
1	G-N-G	0.137
1	G-N-G	0.138
1	G-N-G	0.117
1	G-N-G	0.16
1	G-N-G	0.153
1	G-N-G	0.209
1	G-N-G	0.213
1	G-N-G	0.136
1	G-N-G	0.157
1	G-N-G	0.111
1	G-N-G	0.145
1	G-N-G	0.118
1	G-N-G	0.163
1	G-N-G	0.069
1	G-N-G	0.067
1	G-N-G	0.097
1	G-N-G	0.111
1	G-N-G	0.108
1	G-G-N	0.067
1	G-G-N	0.085
1	G-G-N	0.137
1	G-G-N	0.146
1	G-G-N	0.093
1	G-G-N	0.123
1	G-G-N	0.115
1	G-G-N	0.13
1	G-G-N	0.084
1	G-G-N	0.093
1	G-G-N	0.126
1	G-G-N	0.105
1	G-G-N	0.155
1	G-G-N	0.115
1	G-G-N	0.154
1	G-G-N	0.153
1	G-G-N	0.136
1	G-G-N	0.16
1	G-G-N	0.198
1	G-G-N	0.115
1	G-G-N	0.114
1	G-G-N	0.105
1	G-G-N	0.109
1	G-G-N	0.055
1	G-G-N	0.115
1	G-G-N	0.111
1	G-G-N	0.066
1	G-G-N	0.084
1	G-G-N	0.123
1	G-G-N	0.084
2	N-G	0.14
2	N-G	0.168
2	N-G	0.171
2	N-G	0.166
2	N-G	0.192
2	N-G	0.195
2	N-G	0.207
2	N-G	0.18
2	N-G	0.252
2	N-G	0.241
2	N-G	0.268
2	N-G	0.291
2	N-G	0.221
2	N-G	0.209
2	N-G	0.22
2	N-G	0.177
2	N-G	0.179
2	N-G	0.213
2	N-G	0.169
2	N-G	0.256
2	N-G	0.284
2	N-G	0.229
2	N-G	0.278
2	N-G	0.294
2	N-G	0.34
2	N-G	0.209
2	N-G	0.278
2	N-G	0.279
2	N-G	0.25
2	N-G	0.247
2	G-N	0.088
2	G-N	0.098
2	G-N	0.094
2	G-N	0.175
2	G-N	0.18
2	G-N	0.166
2	G-N	0.087
2	G-N	0.135
2	G-N	0.092
2	G-N	0.093
2	G-N	0.1
2	G-N	0.134
2	G-N	0.134
2	G-N	0.097
2	G-N	0.097
2	G-N	0.158
2	G-N	0.113
2	G-N	0.116
2	G-N	0.092
2	G-N	0.097
2	G-N	0.117
2	G-N	0.146
2	G-N	0.242
2	G-N	0.095
2	G-N	0.087
2	G-N	0.173
2	G-N	0.126
2	G-N	0.131
2	G-N	0.101
2	G-N	0.11
2	G-N-G	0.122
2	G-N-G	0.082
2	G-N-G	0.107
2	G-N-G	0.14
2	G-N-G	0.098
2	G-N-G	0.128
2	G-N-G	0.136
2	G-N-G	0.178
2	G-N-G	0.212
2	G-N-G	0.104
2	G-N-G	0.115
2	G-N-G	0.102
2	G-N-G	0.106
2	G-N-G	0.126
2	G-N-G	0.159
2	G-N-G	0.113
2	G-N-G	0.098
2	G-N-G	0.186
2	G-N-G	0.107
2	G-N-G	0.144
2	G-N-G	0.172
2	G-N-G	0.161
2	G-N-G	0.138
2	G-N-G	0.14
2	G-N-G	0.158
2	G-N-G	0.113
2	G-N-G	0.098
2	G-N-G	0.124
2	G-N-G	0.131
2	G-N-G	0.157
2	G-N-G	0.172
2	G-G-N	0.086
2	G-G-N	0.083
2	G-G-N	0.095
2	G-G-N	0.061
2	G-G-N	0.064
2	G-G-N	0.057
2	G-G-N	0.057
2	G-G-N	0.084
2	G-G-N	0.084
2	G-G-N	0.084
2	G-G-N	0.053
2	G-G-N	0.172
2	G-G-N	0.054
2	G-G-N	0.152
2	G-G-N	0.118
2	G-G-N	0.1
2	G-G-N	0.063
2	G-G-N	0.175
2	G-G-N	0.058
2	G-G-N	0.064
2	G-G-N	0.094
2	G-G-N	0.091
2	G-G-N	0.1
2	G-G-N	0.092
2	G-G-N	0.067
2	G-G-N	0.098
2	G-G-N	0.066
2	G-G-N	0.07
2	G-G-N	0.087
3	N-G	0.159
3	N-G	0.218
3	N-G	0.146
3	N-G	0.154
3	N-G	0.129
3	N-G	0.153
3	N-G	0.175
3	N-G	0.149
3	N-G	0.144
3	N-G	0.202
3	N-G	0.133
3	N-G	0.199
3	N-G	0.16
3	N-G	0.133
3	N-G	0.173
3	N-G	0.166
3	N-G	0.182
3	N-G	0.163
3	N-G	0.197
3	N-G	0.167
3	N-G	0.17
3	N-G	0.186
3	N-G	0.222
3	N-G	0.159
3	N-G	0.228
3	N-G	0.143
3	N-G	0.215
3	N-G	0.226
3	N-G	0.232
3	N-G	0.234
3	G-N	0.049
3	G-N	0.093
3	G-N	0.054
3	G-N	0.085
3	G-N	0.061
3	G-N	0.097
3	G-N	0.063
3	G-N	0.078
3	G-N	0.111
3	G-N	0.057
3	G-N	0.09
3	G-N	0.052
3	G-N	0.11
3	G-N	0.098
3	G-N	0.075
3	G-N	0.097
3	G-N	0.185
3	G-N	0.119
3	G-N	0.092
3	G-N	0.087
3	G-N	0.159
3	G-N	0.088
3	G-N	0.087
3	G-N	0.073
3	G-N	0.068
3	G-N	0.079
3	G-N	0.063
3	G-N	0.1
3	G-N	0.099
3	G-N	0.1
3	G-N-G	0.137
3	G-N-G	0.168
3	G-N-G	0.103
3	G-N-G	0.115
3	G-N-G	0.15
3	G-N-G	0.127
3	G-N-G	0.146
3	G-N-G	0.061
3	G-N-G	0.176
3	G-N-G	0.162
3	G-N-G	0.147
3	G-N-G	0.117
3	G-N-G	0.157
3	G-N-G	0.12
3	G-N-G	0.179
3	G-N-G	0.172
3	G-N-G	0.125
3	G-N-G	0.211
3	G-N-G	0.118
3	G-N-G	0.145
3	G-N-G	0.143
3	G-N-G	0.125
3	G-N-G	0.174
3	G-N-G	0.2
3	G-N-G	0.142
3	G-N-G	0.262
3	G-N-G	0.115
3	G-N-G	0.178
3	G-N-G	0.133
3	G-N-G	0.223
3	G-G-N	0.077
3	G-G-N	0.061
3	G-G-N	0.045
3	G-G-N	0.058
3	G-G-N	0.095
3	G-G-N	0.071
3	G-G-N	0.074
3	G-G-N	0.09
3	G-G-N	0.106
3	G-G-N	0.123
3	G-G-N	0.11
3	G-G-N	0.112
3	G-G-N	0.12
3	G-G-N	0.081
3	G-G-N	0.078
3	G-G-N	0.121
3	G-G-N	0.113
3	G-G-N	0.134
3	G-G-N	0.104
3	G-G-N	0.074
3	G-G-N	0.099
3	G-G-N	0.083
3	G-G-N	0.094
3	G-G-N	0.057
3	G-G-N	0.114
3	G-G-N	0.084
3	G-G-N	0.132
3	G-G-N	0.134
3	G-G-N	0.06
3	G-G-N	0.077
