# Supplementary material for: The relative binding position of Nck and Grb2 adaptors impacts actin-based motility of Vaccinia virus
Source: eLife journal article supplement (doi:10.7554/elife.74655), 2022-07-07
Supplement: supp [file Fig7D_source data.xlsx]

## Sheet: Sheet1
replicate	condition	plaque size
1	N-G	1.25053
1	N-G	1.42918
1	N-G	1.53126
1	N-G	1.53126
1	N-G	1.78647
1	N-G	1.40366
1	N-G	1.42918
1	N-G	0.816672
1	N-G	1.14844
1	N-G	1.07188
1	N-G	1.37813
1	N-G	0.944277
1	N-G	0.842193
1	N-G	1.30157
1	N-G	1.42918
1	N-G	1.30157
1	N-G	1.12292
1	N-G	1.02084
1	N-G	1.42918
1	N-G	1.99064
2	N-G	1.88855
2	N-G	1.27605
2	N-G	1.25053
2	N-G	1.22501
2	N-G	1.30157
2	N-G	1.30157
2	N-G	1.17397
2	N-G	1.83751
2	N-G	1.68439
2	N-G	1.32709
2	N-G	1.5823
2	N-G	1.0974
2	N-G	1.32709
2	N-G	1.4547
2	N-G	1.07188
2	N-G	1.4547
2	N-G	1.35261
2	N-G	1.83751
2	N-G	1.14844
2	N-G	1.22501
2	N-G	1.27605
3	N-G	1.5823
3	N-G	1.76095
3	N-G	1.25053
3	N-G	1.42918
3	N-G	1.48022
3	N-G	1.30157
3	N-G	1.48022
3	N-G	1.60782
3	N-G	1.4547
3	N-G	1.5823
3	N-G	1.07188
3	N-G	1.17397
3	N-G	0.969798
3	N-G	1.04636
3	N-G	1.37813
3	N-G	1.30157
3	N-G	1.48022
1	G-N	1.22501
1	G-N	1.19949
1	G-N	1.5823
1	G-N	0.663546
1	G-N	1.48022
1	G-N	1.35261
1	G-N	1.02084
1	G-N	0.842193
1	G-N	1.48022
1	G-N	0.76563
1	G-N	1.07188
1	G-N	1.32709
1	G-N	1.30157
1	G-N	1.0974
1	G-N	1.27605
1	G-N	1.17397
1	G-N	1.04636
1	G-N	1.04636
1	G-N	1.14844
1	G-N	1.04636
1	G-N	1.25053
1	G-N	1.0974
1	G-N	1.17397
1	G-N	0.842193
1	G-N	0.867714
1	G-N	0.893235
2	G-N	1.32709
2	G-N	0.893235
2	G-N	1.14844
2	G-N	1.07188
2	G-N	0.893235
2	G-N	1.12292
2	G-N	1.0974
2	G-N	1.0974
2	G-N	1.07188
2	G-N	0.689067
2	G-N	1.14844
3	G-N	0.867714
3	G-N	1.02084
3	G-N	0.689067
3	G-N	1.07188
3	G-N	1.02084
3	G-N	0.918756
3	G-N	1.25053
3	G-N	1.48022
3	G-N	0.918756
3	G-N	0.842193
3	G-N	0.918756
3	G-N	1.12292
3	G-N	0.842193
3	G-N	0.76563
3	G-N	1.14844
3	G-N	0.689067
3	G-N	0.740109
3	G-N	0.740109
3	G-N	1.14844
1	G-N-G	1.30157
1	G-N-G	1.32709
1	G-N-G	1.04636
1	G-N-G	0.867714
1	G-N-G	1.35261
1	G-N-G	1.04636
1	G-N-G	1.40366
1	G-N-G	1.50574
1	G-N-G	1.53126
1	G-N-G	1.22501
1	G-N-G	1.32709
1	G-N-G	0.944277
1	G-N-G	1.14844
1	G-N-G	1.32709
1	G-N-G	1.37813
1	G-N-G	1.12292
1	G-N-G	0.995319
2	G-N-G	1.19949
2	G-N-G	1.0974
2	G-N-G	1.14844
2	G-N-G	1.17397
2	G-N-G	1.55678
2	G-N-G	1.22501
2	G-N-G	1.42918
2	G-N-G	1.32709
2	G-N-G	1.48022
2	G-N-G	1.02084
2	G-N-G	0.842193
2	G-N-G	1.32709
2	G-N-G	1.35261
2	G-N-G	0.944277
2	G-N-G	1.22501
2	G-N-G	1.0974
2	G-N-G	1.40366
2	G-N-G	0.944277
2	G-N-G	1.50574
3	G-N-G	1.35261
3	G-N-G	1.30157
3	G-N-G	0.791151
3	G-N-G	1.48022
3	G-N-G	1.02084
3	G-N-G	1.17397
3	G-N-G	1.07188
3	G-N-G	0.918756
3	G-N-G	0.791151
3	G-N-G	0.969798
3	G-N-G	1.35261
3	G-N-G	1.19949
1	G-G-N	1.07188
1	G-G-N	0.918756
1	G-G-N	0.867714
1	G-G-N	0.842193
1	G-G-N	1.37813
1	G-G-N	1.35261
1	G-G-N	0.842193
1	G-G-N	1.0974
1	G-G-N	1.35261
1	G-G-N	1.25053
1	G-G-N	1.14844
1	G-G-N	1.17397
1	G-G-N	1.25053
1	G-G-N	1.30157
1	G-G-N	1.0974
1	G-G-N	0.918756
1	G-G-N	0.995319
1	G-G-N	1.17397
1	G-G-N	1.22501
1	G-G-N	1.19949
2	G-G-N	1.32709
2	G-G-N	0.816672
2	G-G-N	0.944277
2	G-G-N	1.12292
2	G-G-N	1.17397
2	G-G-N	1.07188
2	G-G-N	1.37813
2	G-G-N	1.4547
2	G-G-N	1.19949
2	G-G-N	1.19949
2	G-G-N	0.816672
2	G-G-N	1.22501
2	G-G-N	1.19949
2	G-G-N	0.944277
2	G-G-N	1.07188
2	G-G-N	1.32709
2	G-G-N	1.32709
2	G-G-N	0.893235
2	G-G-N	0.893235
2	G-G-N	0.842193
2	G-G-N	0.76563
3	G-G-N	0.918756
3	G-G-N	1.14844
3	G-G-N	0.867714
3	G-G-N	0.918756
3	G-G-N	1.25053
3	G-G-N	1.14844
3	G-G-N	1.04636
3	G-G-N	0.918756
3	G-G-N	0.689067
3	G-G-N	1.12292
3	G-G-N	1.07188
3	G-G-N	0.842193
3	G-G-N	0.842193
3	G-G-N	0.918756
3	G-G-N	1.02084
3	G-G-N	0.969798
3	G-G-N	0.791151
3	G-G-N	1.04636
