# Supplementary material for: The relative binding position of Nck and Grb2 adaptors impacts actin-based motility of Vaccinia virus
Source: eLife journal article supplement (doi:10.7554/elife.74655), 2022-07-07
Supplement: supp [file Fig7E_source data.xlsx]

## Sheet: Sheet1
replicate	condition	GFP N-WASP/RFP
1	N-G	0.495833
1	N-G	0.353274
1	N-G	0.272237
1	N-G	0.421234
1	N-G	0.261345
1	N-G	0.206203
1	N-G	0.15999
1	N-G	0.224409
1	N-G	0.266202
1	N-G	0.221623
1	N-G	0.359086
1	N-G	0.365483
1	N-G	0.210402
1	N-G	0.0750876
1	N-G	0.0442536
1	N-G	0.0576581
1	N-G	0.0606999
1	N-G	0.067262
1	N-G	0.509512
1	N-G	0.454936
1	N-G	0.600456
1	N-G	0.645105
1	N-G	0.499401
1	N-G	0.568462
1	N-G	0.523492
1	N-G	0.257498
1	N-G	0.428
1	N-G	0.558563
1	N-G	0.56646
1	N-G	0.545024
1	G-N	0.0511299
1	G-N	0.0498238
1	G-N	0.0598537
1	G-N	0.101605
1	G-N	0.056553
1	G-N	0.0418497
1	G-N	0.232023
1	G-N	0.154596
1	G-N	0.193618
1	G-N	0.208573
1	G-N	0.180047
1	G-N	0.112229
1	G-N	0.183619
1	G-N	0.217812
1	G-N	0.0992525
1	G-N	0.160392
1	G-N	0.13397
1	G-N	0.08816
1	G-N	0.0840208
1	G-N	0.0628637
1	G-N	0.112084
1	G-N	0.120268
1	G-N	0.0529856
1	G-N	0.0793396
1	G-N	0.099634
1	G-N	0.0780244
1	G-N	0.119516
1	G-N	0.138242
1	G-N	0.0912937
1	G-N	0.101226
1	G-N-G	0.226724
1	G-N-G	0.302197
1	G-N-G	0.149978
1	G-N-G	0.21938
1	G-N-G	0.300263
1	G-N-G	0.357909
1	G-N-G	0.246476
1	G-N-G	0.260397
1	G-N-G	0.218264
1	G-N-G	0.244162
1	G-N-G	0.19508
1	G-N-G	0.122911
1	G-N-G	0.151686
1	G-N-G	0.123062
1	G-N-G	0.122405
1	G-N-G	0.153787
1	G-N-G	0.258963
1	G-N-G	0.224906
1	G-N-G	0.230582
1	G-N-G	0.228878
1	G-N-G	0.292209
1	G-N-G	0.413476
1	G-N-G	0.396472
1	G-N-G	0.358532
1	G-N-G	0.332977
1	G-N-G	0.396472
1	G-N-G	0.11466
1	G-N-G	0.265221
1	G-N-G	0.173387
1	G-N-G	0.311283
1	G-N-G	0.154432
1	G-G-N	0.0714554
1	G-G-N	0.0831403
1	G-G-N	0.0851067
1	G-G-N	0.0706
1	G-G-N	0.0573883
1	G-G-N	0.0689067
1	G-G-N	0.0789985
1	G-G-N	0.136893
1	G-G-N	0.0624403
1	G-G-N	0.0701858
1	G-G-N	0.0303662
1	G-G-N	0.0839404
1	G-G-N	0.102434
1	G-G-N	0.159619
1	G-G-N	0.181879
1	G-G-N	0.126616
1	G-G-N	0.148188
1	G-G-N	0.102703
1	G-G-N	0.121362
1	G-G-N	0.123038
1	G-G-N	0.133202
1	G-G-N	0.198374
1	G-G-N	0.118747
1	G-G-N	0.160622
1	G-G-N	0.195126
1	G-G-N	0.28606
1	G-G-N	0.119895
1	G-G-N	0.232585
1	G-G-N	0.115295
1	G-G-N	0.112334
1	G-G-N	0.0851941
1	G-G-N	0.0758725
2	N-G	0.246747
2	N-G	0.350115
2	N-G	0.385128
2	N-G	0.246747
2	N-G	0.312962
2	N-G	0.311002
2	N-G	0.0806747
2	N-G	0.107638
2	N-G	0.101868
2	N-G	0.293587
2	N-G	0.190884
2	N-G	0.0685778
2	N-G	0.098247
2	N-G	0.161723
2	N-G	0.305348
2	N-G	0.226018
2	N-G	0.174304
2	N-G	0.285739
2	N-G	0.224497
2	N-G	0.400481
2	N-G	0.341049
2	N-G	0.277716
2	N-G	0.205893
2	N-G	0.279124
2	N-G	0.454055
2	N-G	0.384775
2	N-G	0.175734
2	N-G	0.199823
2	N-G	0.139541
2	N-G	0.156514
2	G-N	0.233745
2	G-N	0.34445
2	G-N	0.194332
2	G-N	0.342249
2	G-N	0.261515
2	G-N	0.27352
2	G-N	0.154808
2	G-N	0.0787096
2	G-N	0.0626646
2	G-N	0.105538
2	G-N	0.154808
2	G-N	0.0722042
2	G-N	0.0874524
2	G-N	0.0717172
2	G-N	0.0698333
2	G-N	0.0736783
2	G-N	0.0839836
2	G-N	0.0653937
2	G-N	0.113467
2	G-N	0.105822
2	G-N	0.161417
2	G-N	0.0731442
2	G-N	0.10198
2	G-N	0.106559
2	G-N	0.148921
2	G-N	0.168015
2	G-N	0.164434
2	G-N	0.16555
2	G-N	0.193063
2	G-N	0.164914
2	G-N-G	0.730329
2	G-N-G	0.825927
2	G-N-G	0.588179
2	G-N-G	0.981696
2	G-N-G	0.600403
2	G-N-G	0.51406
2	G-N-G	0.269917
2	G-N-G	0.396762
2	G-N-G	0.361797
2	G-N-G	0.525834
2	G-N-G	0.347816
2	G-N-G	0.687301
2	G-N-G	0.561126
2	G-N-G	0.580373
2	G-N-G	0.517124
2	G-N-G	0.631428
2	G-N-G	0.456845
2	G-N-G	0.424033
2	G-N-G	0.236143
2	G-N-G	0.223075
2	G-N-G	0.236241
2	G-N-G	0.257824
2	G-N-G	0.13884
2	G-N-G	0.235899
2	G-N-G	0.24055
2	G-N-G	0.266572
2	G-N-G	0.227503
2	G-N-G	0.230132
2	G-N-G	0.247366
2	G-N-G	0.182598
2	G-G-N	0.148879
2	G-G-N	0.128623
2	G-G-N	0.111652
2	G-G-N	0.136669
2	G-G-N	0.157639
2	G-G-N	0.0784122
2	G-G-N	0.121951
2	G-G-N	0.082408
2	G-G-N	0.0637114
2	G-G-N	0.0772431
2	G-G-N	0.0829713
2	G-G-N	0.135602
2	G-G-N	0.107809
2	G-G-N	0.207283
2	G-G-N	0.178495
2	G-G-N	0.220956
2	G-G-N	0.167567
2	G-G-N	0.145589
2	G-G-N	0.126224
2	G-G-N	0.0714822
2	G-G-N	0.0893211
2	G-G-N	0.128702
2	G-G-N	0.0652271
2	G-G-N	0.0683732
2	G-G-N	0.0921104
2	G-G-N	0.0539167
2	G-G-N	0.113484
2	G-G-N	0.0710132
2	G-G-N	0.0980397
2	G-G-N	0.096203
3	N-G	0.339556
3	N-G	0.358528
3	N-G	0.291418
3	N-G	0.297747
3	N-G	0.282538
3	N-G	0.232062
3	N-G	0.259065
3	N-G	0.224718
3	N-G	0.21557
3	N-G	0.408608
3	N-G	0.278934
3	N-G	0.278261
3	N-G	0.423175
3	N-G	0.30741
3	N-G	0.24725
3	N-G	0.244309
3	N-G	0.208765
3	N-G	0.216602
3	N-G	0.301397
3	N-G	0.34141
3	N-G	0.254017
3	N-G	0.313883
3	N-G	0.262031
3	N-G	0.204565
3	N-G	0.337484
3	N-G	0.201518
3	N-G	0.242521
3	N-G	0.19281
3	N-G	0.168769
3	N-G	0.30402
3	G-N	0.192357
3	G-N	0.140544
3	G-N	0.150322
3	G-N	0.138044
3	G-N	0.14433
3	G-N	0.101845
3	G-N	0.0776686
3	G-N	0.0376707
3	G-N	0.0837075
3	G-N	0.0743762
3	G-N	0.0964349
3	G-N	0.0719153
3	G-N	0.161524
3	G-N	0.109241
3	G-N	0.235857
3	G-N	0.193295
3	G-N	0.151577
3	G-N	0.141483
3	G-N	0.13728
3	G-N	0.154074
3	G-N	0.11674
3	G-N	0.138285
3	G-N	0.128421
3	G-N	0.085427
3	G-N	0.152355
3	G-N	0.0694141
3	G-N	0.114116
3	G-N	0.0895631
3	G-N	0.0906475
3	G-N	0.118616
3	G-N-G	0.426771
3	G-N-G	0.43079
3	G-N-G	0.375916
3	G-N-G	0.46964
3	G-N-G	0.297721
3	G-N-G	0.353511
3	G-N-G	0.40636
3	G-N-G	0.25515
3	G-N-G	0.160756
3	G-N-G	0.128034
3	G-N-G	0.181587
3	G-N-G	0.406579
3	G-N-G	0.221194
3	G-N-G	0.151731
3	G-N-G	0.201599
3	G-N-G	0.160851
3	G-N-G	0.294546
3	G-N-G	0.225532
3	G-N-G	0.287614
3	G-N-G	0.233763
3	G-N-G	0.283968
3	G-N-G	0.363016
3	G-N-G	0.239376
3	G-N-G	0.291904
3	G-N-G	0.219694
3	G-N-G	0.395958
3	G-N-G	0.377668
3	G-N-G	0.400836
3	G-N-G	0.338625
3	G-N-G	0.153092
3	G-G-N	0.27196
3	G-G-N	0.205951
3	G-G-N	0.228995
3	G-G-N	0.414213
3	G-G-N	0.232443
3	G-G-N	0.165737
3	G-G-N	0.161717
3	G-G-N	0.199543
3	G-G-N	0.139467
3	G-G-N	0.114917
3	G-G-N	0.154737
3	G-G-N	0.160932
3	G-G-N	0.131623
3	G-G-N	0.0974651
3	G-G-N	0.0889645
3	G-G-N	0.08106
3	G-G-N	0.0702848
3	G-G-N	0.0901259
3	G-G-N	0.0524086
3	G-G-N	0.046743
3	G-G-N	0.0500083
3	G-G-N	0.0524086
3	G-G-N	0.0283389
3	G-G-N	0.0369964
3	G-G-N	0.310305
3	G-G-N	0.253758
3	G-G-N	0.229052
3	G-G-N	0.238967
3	G-G-N	0.29025
3	G-G-N	0.120765
