# Supplementary figures and images for: The relative binding position of Nck and Grb2 adaptors impacts actin-based motility of Vaccinia virus
Source: eLife journal article supplement (doi:10.7554/elife.74655), 2022-07-07

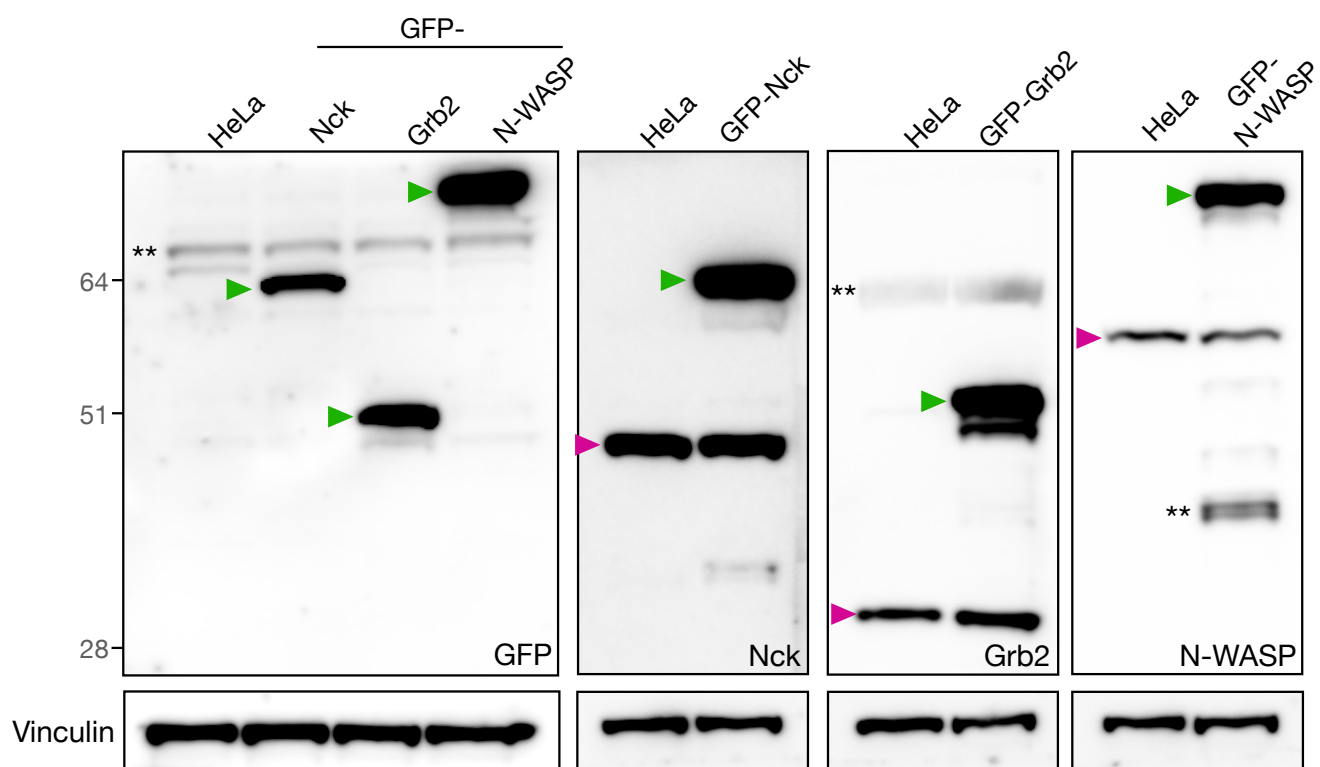

Figure 4 - suppl 1

Supplement: supp [file elife-74655-supp-v1.zip]

**A**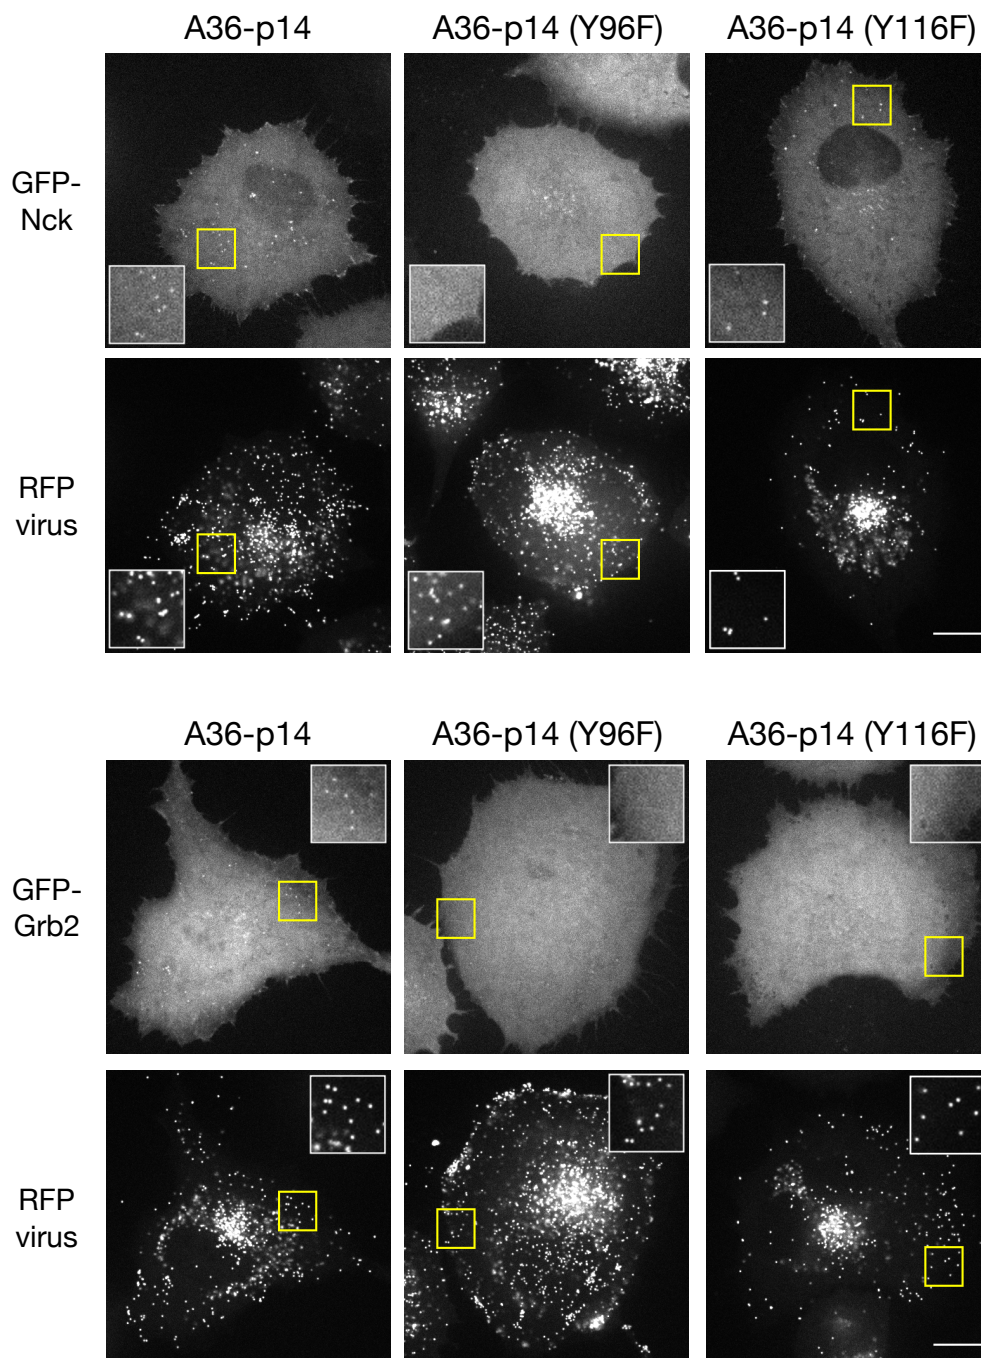**B**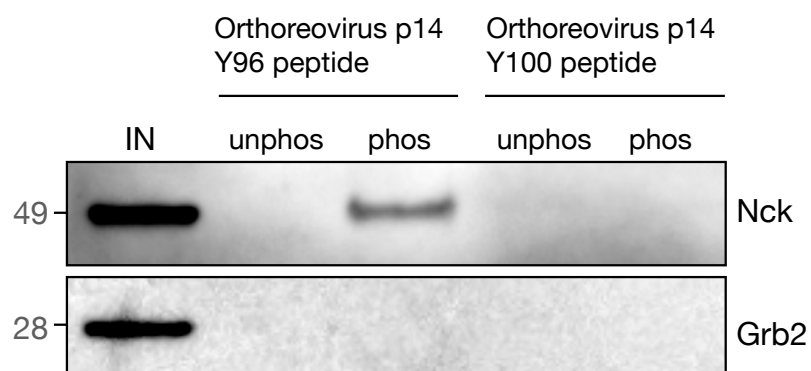**Figure 3 - suppl 1**

Supplement: supp [file elife-74655-supp-v1.zip]

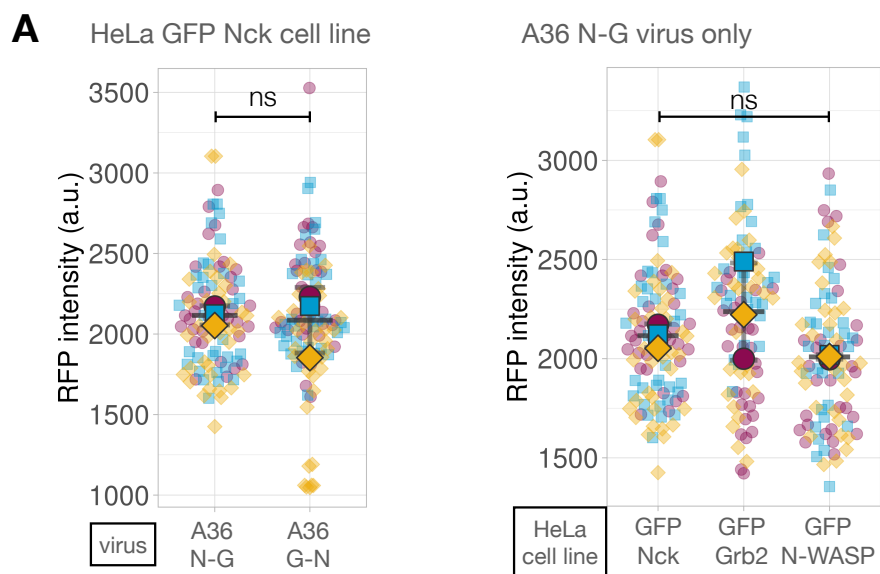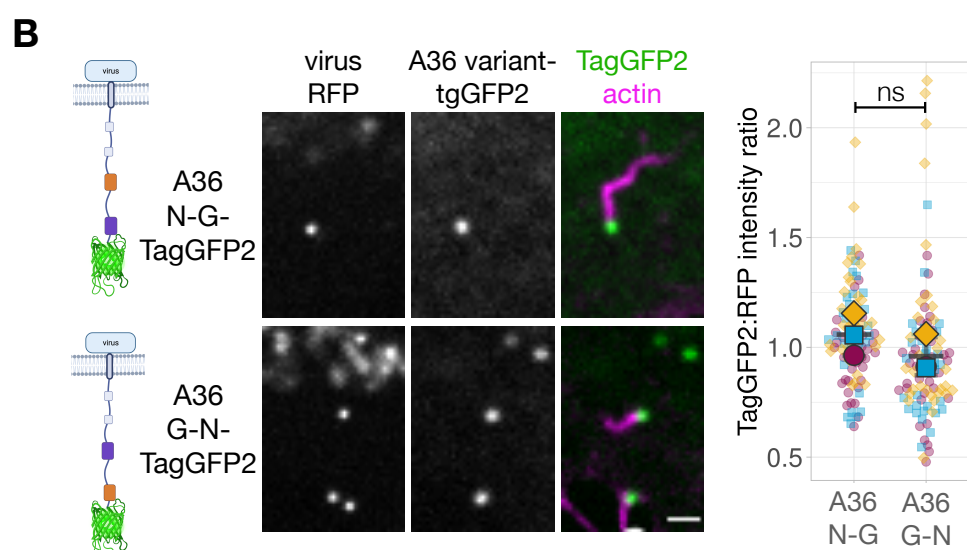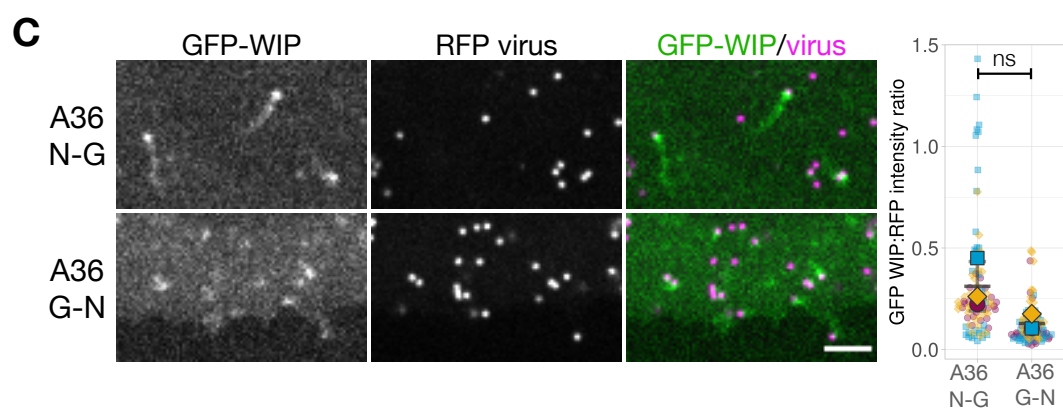

Figure 5 - suppl 1

Supplement: supp [file elife-74655-supp-v1.zip]

**A**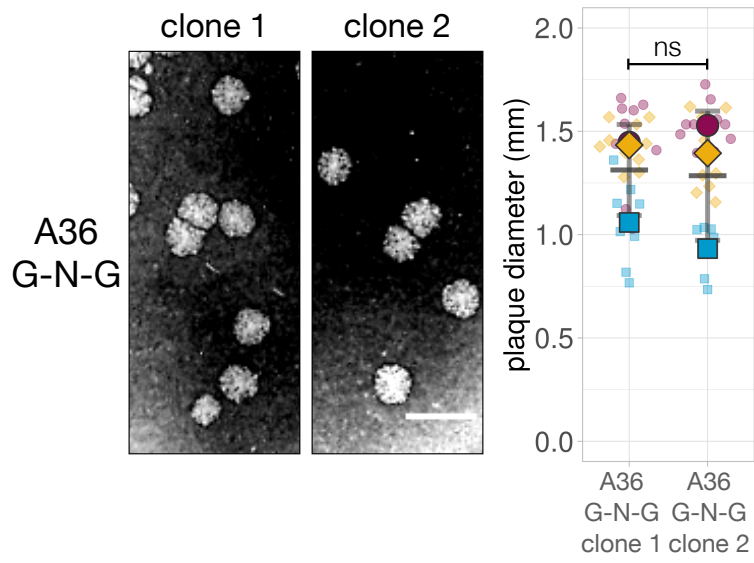**B**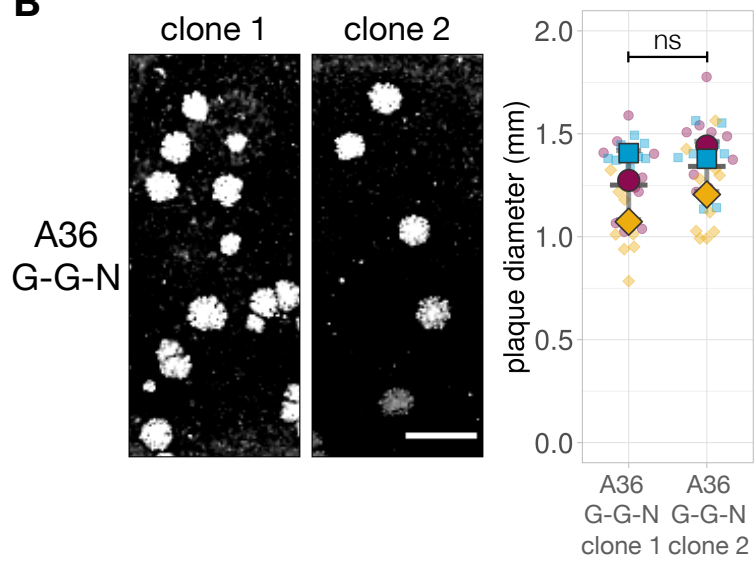**Figure 7 - suppl 2**

Supplement: supp [file elife-74655-supp-v1.zip]

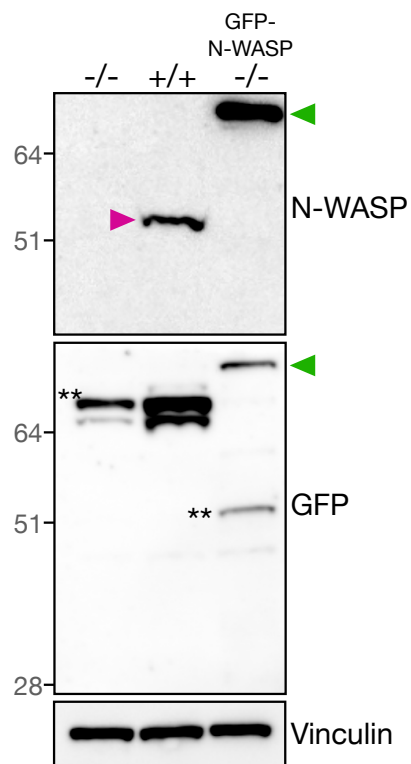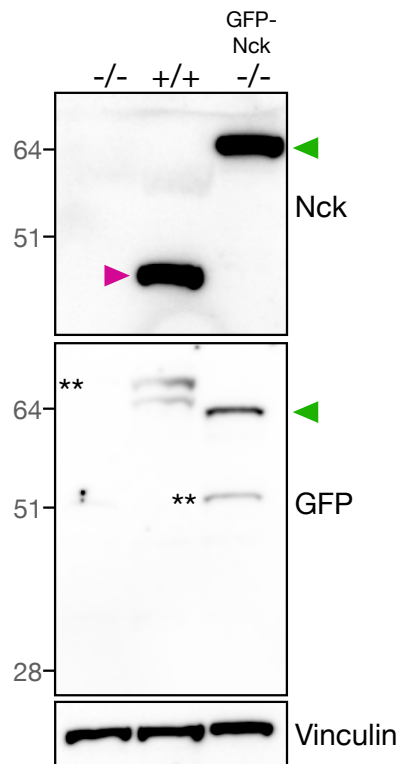

Figure 5 - suppl 2

Supplement: supp [file elife-74655-supp-v1.zip]

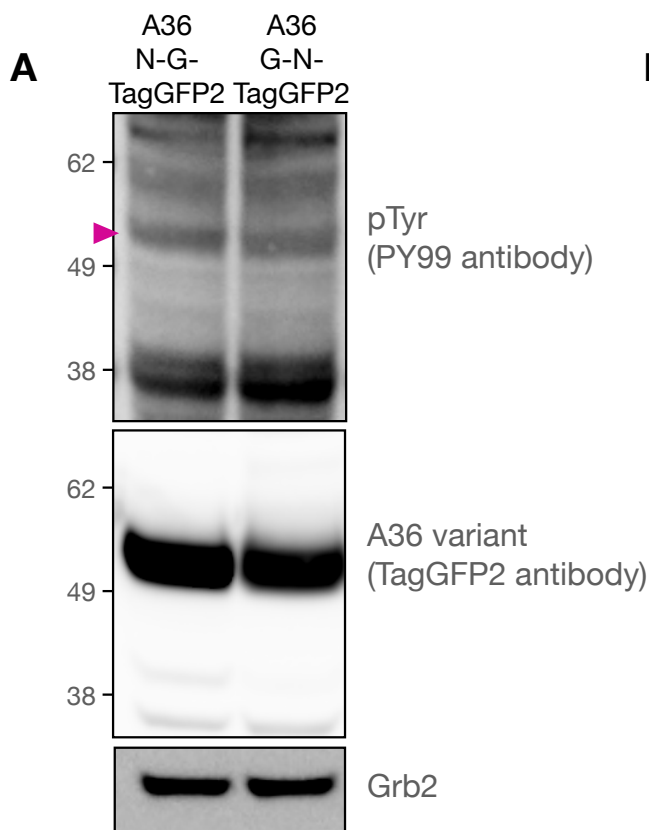

**B**

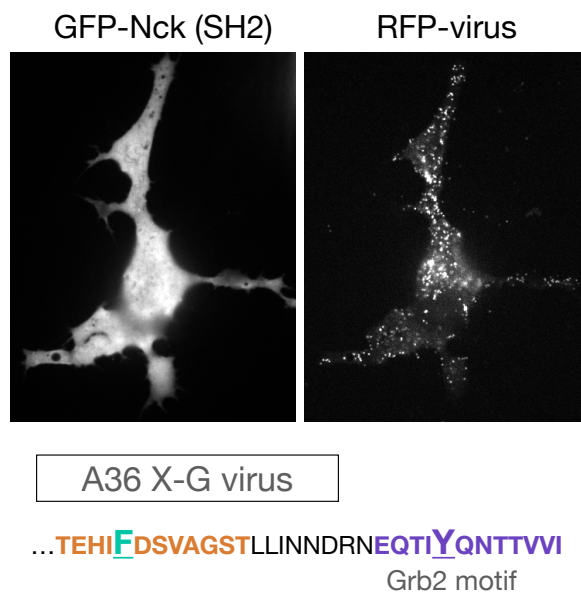

**C**

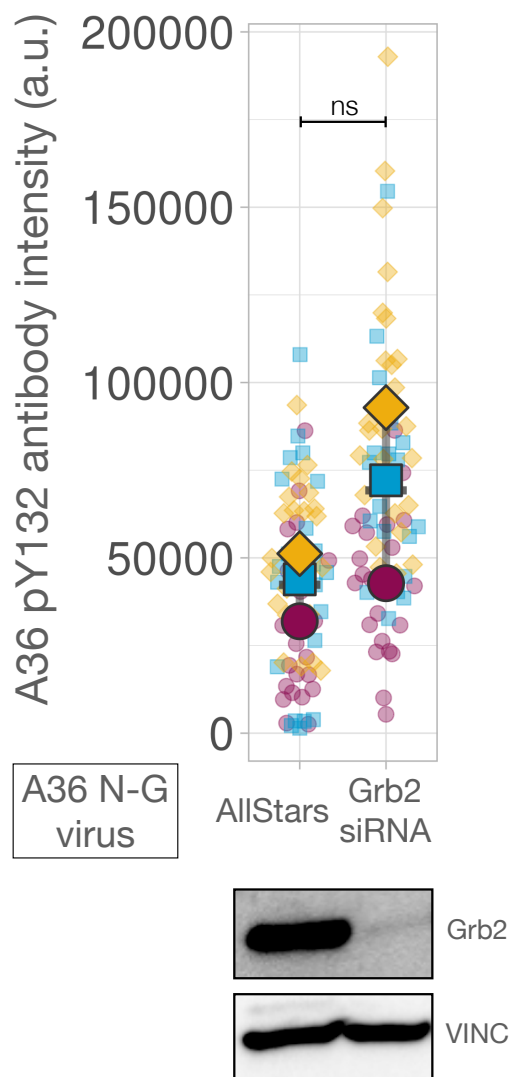

Figure 6 - suppl 1

Supplement: supp [file elife-74655-supp-v1.zip]

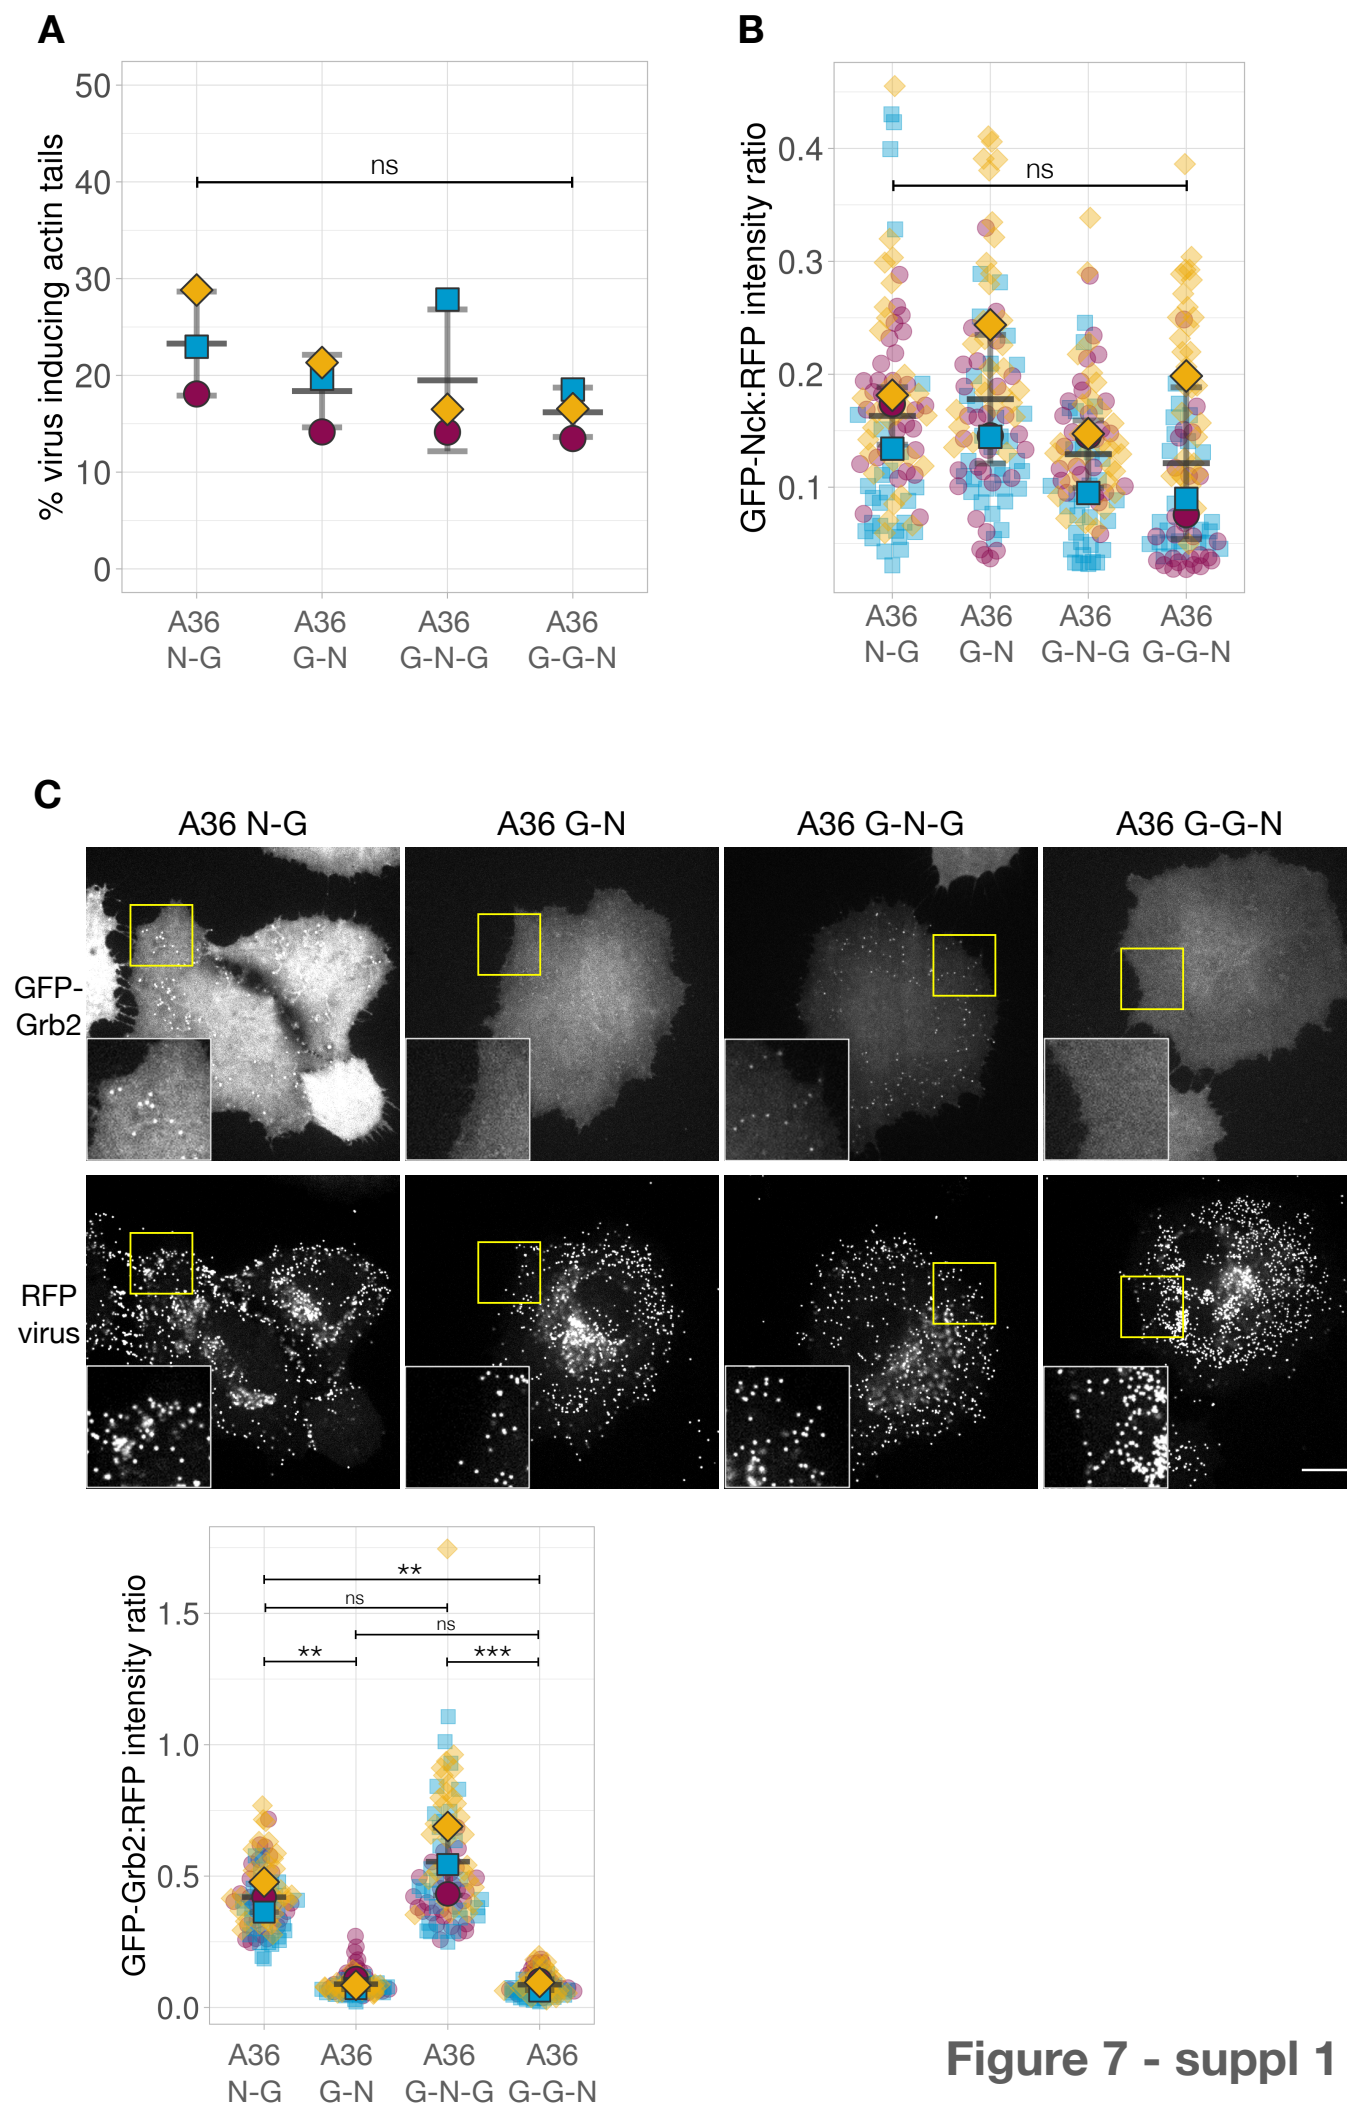

Figure 7 - suppl 1

Supplement: supp [file elife-74655-supp-v1.zip]
